# Supplementary material for: Synthesis of trifluoromethylated 2H-azirines through Togni reagent-mediated trifluoromethylation followed by PhIO-mediated azirination
Source: PubMed Central journal article supplement (PMC6009194; doi:10.3762/bjoc.14.123), 2018-06-15

# Supporting Information

for

## Synthesis of trifluoromethylated 2*H*-azirines through Togni reagent-mediated trifluoromethylation followed by PhIO-mediated azirination

Jiyun Sun<sup>1</sup>, Xiaohua Zhen<sup>1</sup>, Huaibin Ge<sup>1</sup>, Guangtao Zhang<sup>1</sup>, Xuechan An<sup>1</sup>, and Yunfei Du<sup>1,2,\*</sup>

Address: <sup>1</sup>Tianjin Key Laboratory for Modern Drug Delivery and High-Efficiency, School of Pharmaceutical Science and Technology, Tianjin University, Tianjin 300072, China and <sup>2</sup>Collaborative Innovation Center of Chemical Science and Engineering (Tianjin), Tianjin 300072, China

Email: Yunfei Du - duyunfeier@tju.edu.cn; Tel: +86-22-27406121.

\*Corresponding author

### Synthetic details and characterization data

#### Contents

|                                                                                                                      |     |
|----------------------------------------------------------------------------------------------------------------------|-----|
| General Information.....                                                                                             | S2  |
| Preparation of Togni reagent <b>1</b> and substrates <b>5</b> .....                                                  | S2  |
| Preparation of $\beta$ -trifluoromethylated 2 <i>H</i> -azirines <b>7</b> and <b>6a</b> .....                        | S6  |
| Procedure of control experiment.....                                                                                 | S6  |
| References.....                                                                                                      | S7  |
| Characterization data of products <b>7</b> and intermediate <b>6a</b> .....                                          | S8  |
| <sup>1</sup> H NMR, <sup>19</sup> F NMR and <sup>13</sup> C NMR spectra of <b>7</b> and intermediate <b>6a</b> ..... | S14 |

## General information

$^1\text{H}$ ,  $^{19}\text{F}$  and  $^{13}\text{C}$  NMR spectra were recorded using a 600 MHz spectrometer (564 MHz for  $^{19}\text{F}$  NMR and 150 MHz for  $^{13}\text{C}$  NMR) or a 400 MHz spectrometer (375 MHz for  $^{19}\text{F}$  NMR and 100 MHz for  $^{13}\text{C}$  NMR) at 25 °C. Chemical shifts values are given in ppm and referred to TMS (0.00 ppm) as internal standard. Data are reported as follows: chemical shift, multiplicity (s = singlet, d = doublet, t = triplet, q = quartet, br = broad, m = multiplet). The coupling constants  $J$ , are reported in hertz (Hz). High resolution mass spectrometry (HRMS) was obtained on a Q-TOF micro spectrometer. Melting points were determined with a Micromelting point apparatus. TLC plates were visualized by exposure to ultraviolet light. Reagents and solvents were purchased as reagent grade and were used without further purification. All reactions were performed in standard glassware, heated at 70 °C for 3 h before use. Flash column chromatography was performed using silica gel (200–300 mesh).

## Preparation of Togni reagent and substrates 5

### Preparation of Togni reagent

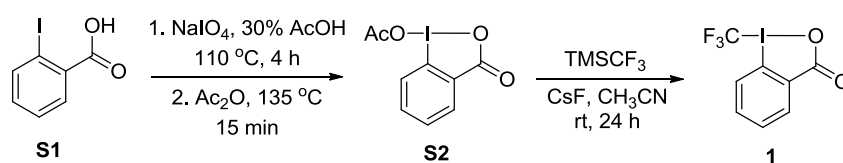

A 500 mL round-bottomed flask was charged with 2-iodobenzoic acid (20.0 g, 80.64 mmol, 1.0 equiv), finely ground NaIO<sub>4</sub> (18.11 g, 84.67 mmol, 1.05 equiv), and 30% aqueous acetic acid (120 mL). The flask was equipped with a reflux condenser and placed in an oil bath preheated to 110 °C. The reaction mixture was allowed to stir at this temperature for four hours at which point the flask was removed from the oil bath and allowed to cool to room temperature. Ice water (100 mL) was added, and the suspension was allowed to stir for 5 min. The fine white needle-like crystals were isolated by

Büchner filtration. The crystals were washed with ice water ( $2 \times 100$  mL) and dried in vacuo to afford **S1** in greater than quantitative yield (contains impurities).

In a 500 mL round-bottomed flask containing the crude 1-hydroxy-1,2-benziodoxol-3-(1*H*)-one (assumed 80.64 mmol, 100% yield for the previous step) was suspended in 56 mL Ac<sub>2</sub>O. The flask was connected to a reflux condenser and placed in an oil bath preheated to 135 °C. The reaction mixture was stirred for 15 min until most of the solid materials dissolved. The flask was removed from the oil bath and allowed to cool to room temperature, resulting in the formation of white crystals. The flask was then placed in a -20 °C freezer overnight to complete the crystallization. The liquids were decanted and the flask was covered with aluminum foil to protect the product from light. Volatiles were removed in vacuo to afford the product in greater than quantitative yield.

To a flame-dried 500 mL round-bottomed flask containing the unpurified 1-acetoxy-1,2-benziodoxol-3-(1*H*)-one (assumed 80.64 mmol, 100% yield for the previous step) under argon was added anhydrous CsF (0.302 g, 2.0 mmol, 0.025 equiv), CH<sub>3</sub>CN (170 mL), and TMSCF<sub>3</sub> (15.93 g, 16.6 mL, 112 mmol, 1.4 equiv) successively. The reaction mixture was stirred vigorously for 24 h. The white solid suspended in the reaction mixture was then isolated by Büchner filtration. This solid was dissolved in chloroform (300 mL) and any insoluble material was removed by filtration through a cotton plug. The colorless filtrate was then washed with water (200 mL) and sat. aq. Na<sub>2</sub>CO<sub>3</sub> (200 mL). The solution was dried over Na<sub>2</sub>SO<sub>4</sub>, filtered and concentrated in vacuo to afford pure **1** (11.07 g, 43%). A second batch of **1** was obtained by concentrating the brown reaction filtrate, dissolving in chloroform (200 mL), washing with water (100 mL) and NaHCO<sub>3</sub> (100 mL). The solution was dried over Na<sub>2</sub>SO<sub>4</sub> and concentrated in vacuo to afford a brownish-white solid. The solid was washed quickly in the flask with a small amount of methanol (~20 mL) to remove a large amount of the brown impurity. The resulting solid was then recrystallized from boiling methanol. Cooling to room temperature and placing in a -20 °C freezer resulted in crystal formation. The crystals were collected, washed with cold methanol, and dried in vacuo to provide a second batch of pure **1** (2.58 g, 10% yield). Total yield: 13.65 g (53%).

## Preparation of substrates 5a–o

### General procedure 1:

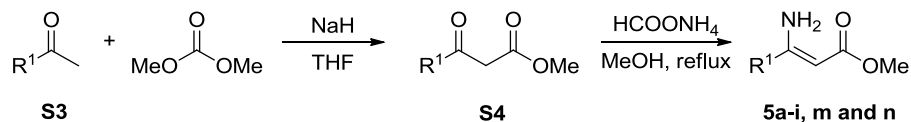

To a solution of ketone **S3** (1.0 equiv, 20 mmol) in THF (80 mL) was added methyl dicarbonate (3.0 equiv, 60 mmol) and NaH (2.0 equiv, 40 mmol, 60%). The reaction mixture was refluxed until TLC indicated the total consumption of the ketone. After cooling, the reaction mixture was poured into ice-water (100 mL), acidified with aqueous HCl (3 M) to pH 2~3 and extracted with EA (100 mL × 3). The combined organic layer was dried over Na<sub>2</sub>SO<sub>4</sub> and evaporated under reduced pressure.

The obtained β-keto ester **S4** (1.0 equiv, 15 mmol) was dissolved in absolute MeOH (60 mL), followed by the addition of ammonium formate (5.0 equiv, 75 mmol). The reaction mixture was stirred under reflux until TLC indicated the total consumption of the β-keto ester and filtered through a short pad of Celite. The filtrate was concentrated in vacuo. To the residue was added water (100 mL), then EA (100 mL × 3) was used to extract the mixture and the organic layer was combined, dried over Na<sub>2</sub>SO<sub>4</sub> and evaporated to dryness. The desired pure product was obtained by silica gel chromatography using a mixture of PE and EA as eluent.

Substrates **5j** and **5o** were prepared from the commercial 3-oxo-3-phenylpropanenitrile **S4-j** and methyl 3-oxobutanoate **S4-o**.

## General procedure 2:

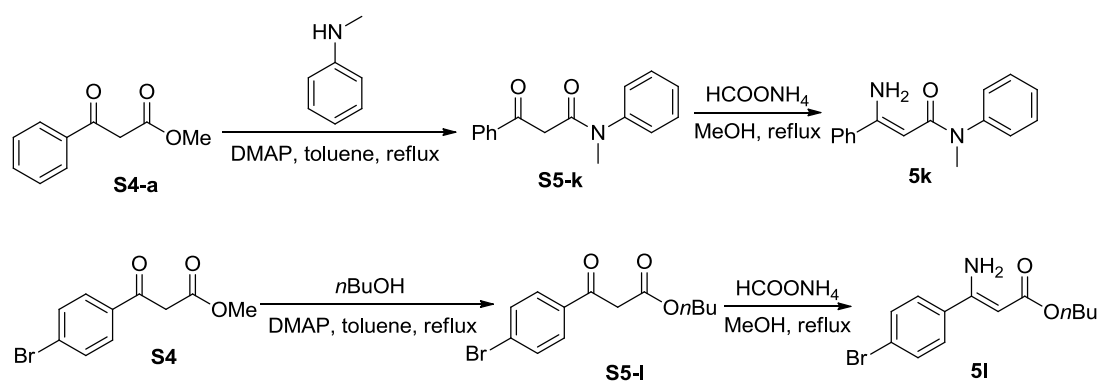

The obtained β-keto ester **S4** (1.0 equiv, 15 mmol) was dissolved in toluene. To this solution was added DMAP (4-dimethylaminopyridine, 0.1 equiv, 1.5 mmol) and *N*-methylaniline (1.1 equiv, 16.5 mmol, for **S5-k**) or *n*-butanol (1.1 equiv, 16.5 mmol, for **S5-I**) at room temperature. The reaction mixture was heated to reflux until **S4** was consumed completely. The reaction mixture was cooled to room temperature and the solvent was removed in vacuo. To the residue was added water (100 mL), then EA (100 mL × 3) was used to extract the mixture and the organic layer was combined, dried over Na<sub>2</sub>SO<sub>4</sub> and evaporated to dryness. The desired pure product, **S5-k** or **S5-I** were obtained by silica gel chromatography using a mixture of PE and EA as eluent.

The obtained **S5-k** or **S5-I** (1.0 equiv, 10 mmol) was dissolved in absolute MeOH (40 mL), followed by the addition of ammonium formate (50 mmol). The reaction mixture was stirred under reflux until TLC indicated the total consumption of the substrate and filtered through a short pad of Celite. The filtrate was concentrated in vacuo. To the residue was added water (100 mL), then EA (100 mL × 3) was used to extract the mixture and the organic layer was combined, dried over Na<sub>2</sub>SO<sub>4</sub> and evaporated to dryness. The desired pure product **5k** or **5I** was obtained by silica gel chromatography using a mixture of PE and EA as eluent.

Spectral properties of the substrates **5**<sup>[1-2]</sup> and Togni reagent<sup>[3-4]</sup> matched the previously reported values.

## Preparation of $\beta$ -trifluoromethylated 2*H*-azirines **7** and intermediate **6a**

### General procedure

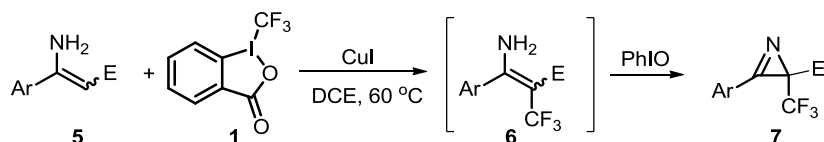

To the enamine substrate **5** (1.0 mmol) dissolved in DCE (10 mL) were added at room temperature Togni reagent **1** (1.2 mmol) and CuI (0.2 mmol). The reaction mixture was heated to 60 °C and progress of the reaction was monitored by TLC. Upon completion, PhIO (1.5 mmol) was added to the mixture and the reaction temperature was maintained at 60 °C. When TLC analysis indicated total consumption of the formed intermediate **6**, the reaction was cooled to room temperature and quenched with saturated aqueous NaHCO<sub>3</sub> (30 mL). Then DCM (20 mL  $\times$  3) was used to extract the mixture and the combined organic layer was washed with saturated aqueous NaCl (20 mL), dried over Na<sub>2</sub>SO<sub>4</sub> and evaporated to dryness. The desired product **7** was obtained by silica gel chromatography using a mixture of EtOAc/petroleum ether (PE) (10/90, v/v) as eluent.

### The procedure of control experiments

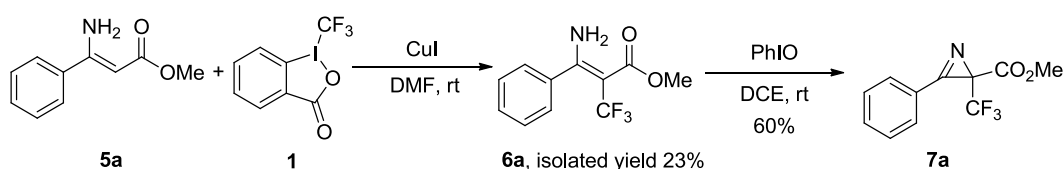

#### Procedure of step I:

The enamine substrate **5a** (1.0 mmol) was dissolved in DMF (10 mL), then Togni reagent **1** (1.2 mmol) and CuI (0.2 mmol) were added at room temperature. The progress of the reaction was monitored by TLC. Upon completion, the reaction was

quenched with saturated aqueous NaHCO<sub>3</sub> (30 mL) at room temperature. Then DCM (20 mL × 3) was used to extract the mixture and the combined organic layer was washed with saturated aqueous NaCl (20 mL), dried over Na<sub>2</sub>SO<sub>4</sub> and evaporated to dryness. The desired product **6a** was obtained by silica gel chromatography using a mixture of EtOAc/petroleum ether (PE) (10/90, v/v) as eluent.

#### Procedure of Step II:

The obtained **6a** (56 mg, 0.23 mmol) was dissolved in DCE (10 mL), then PhIO (1.2 equiv, 0.28 mmol) was added to the reaction mixture at room temperature. When the TLC analysis indicated intermediate **6a** was totally consumed, the reaction was quenched with saturated aqueous NaHCO<sub>3</sub> (10 mL) at room temperature. Then DCM (10 mL × 3) was used to extract the mixture and the organic layer was combined, washed with saturated aqueous NaCl (10 mL), dried over Na<sub>2</sub>SO<sub>4</sub> and evaporated to dryness. The desired product **7a** was obtained by silica gel chromatography using a mixture of EtOAc/petroleum ether (PE) (10/90, v/v) as eluent. Yield: 33.5 mg, 60%.

#### References

1. Sun, J.; Zhang-Negrerie, Daisy.; Du, Y. *Adv. Synth. Catal.* **2016**, *358*, 2035.
2. Yuan, Y.; Hou, W.; Zhang-Negrerie, D.; Zhao, Kang.; Du, Y. *Org. Lett.* **2014**, *16*, 5410.
3. Stanek, K.; Koller, R.; Togni, A. *J. Org. Chem.* **2008**, *73*, 7678.
4. Eisenberger, P.; Gischig, S.; Togni, A. *Chem. – Eur. J.* **2006**, *12*, 2579.

## Characterization data of products 7 and intermediate 6a

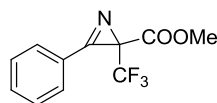

7a

### Methyl 3-phenyl-2-(trifluoromethyl)-2H-azirine-2-carboxylate (7a)

Following the general procedure, **7a** was purified by silica gel chromatography (EtOAc/PE = 10/90). Yield: 134 mg, 55%, yellow oil.  $^1\text{H}$  NMR (600 MHz,  $\text{CDCl}_3$ )  $\delta$  7.92 (d,  $J = 7.1$  Hz, 2H), 7.73 (t,  $J = 7.5$  Hz, 1H), 7.64 (t,  $J = 7.7$  Hz, 2H), 3.80 (s, 3H).  $^{19}\text{F}$  NMR (564 MHz,  $\text{CDCl}_3$ )  $\delta$  -65.70.  $^{13}\text{C}$  NMR (150 MHz,  $\text{CDCl}_3$ )  $\delta$  166.6, 155.5, 135.2, 131.1, 129.7, 122.78 (q,  $J = 275.3$  Hz), 119.6, 53.2, 38.0 (q,  $J = 38.9$  Hz). HRMS (ESI) calcd for  $\text{C}_{11}\text{H}_8\text{F}_3\text{NNaO}_2^+$  [ $\text{M} + \text{Na}^+$ ] 266.0399, found 266.0403.

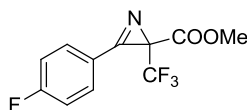

7b

### Methyl 3-(4-fluorophenyl)-2-(trifluoromethyl)-2H-azirine-2-carboxylate (7b)

Following the general procedure, **7b** was purified by silica gel chromatography (EtOAc/PE = 10/90). Yield: 128 mg, 45%, yellow oil.  $^1\text{H}$  NMR (600 MHz,  $\text{CDCl}_3$ )  $\delta$  8.37 – 7.69 (m, 2H), 7.34 (t,  $J = 8.5$  Hz, 2H), 3.81 (s, 3H).  $^{19}\text{F}$  NMR (564 MHz,  $\text{CDCl}_3$ )  $\delta$  -65.76, -99.80.  $^{13}\text{C}$  NMR (150 MHz,  $\text{CDCl}_3$ )  $\delta$  167.0 (d,  $J = 177.4$  Hz), 165.9, 154.5, 133.7 (d,  $J = 9.8$  Hz), 122.7 (q,  $J = 275.3$  Hz), 117.5 (d,  $J = 22.8$  Hz), 115.9 (d,  $J = 2.9$  Hz), 53.2, 38.1 (q,  $J = 38.9$  Hz). HRMS (ESI) calcd for  $\text{C}_{11}\text{H}_7\text{F}_4\text{NNaO}_2^+$  [ $\text{M} + \text{Na}^+$ ] 284.0305, found 284.0309.

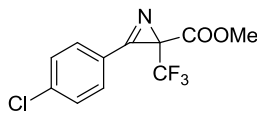

7c

### Methyl 3-(4-chlorophenyl)-2-(trifluoromethyl)-2H-azirine-2-carboxylate (7c)

Following the general procedure, **7c** was purified by silica gel chromatography (EtOAc/PE = 10/90). Yield: 130 mg, 47%, yellow solid, m.p. 67-68 °C.  $^1\text{H}$  NMR (600



MHz, CDCl<sub>3</sub>)  $\delta$  7.86 (d,  $J = 8.5$  Hz, 2H), 7.62 (d,  $J = 8.4$  Hz, 2H), 3.81 (s, 3H). <sup>19</sup>F NMR (564 MHz, CDCl<sub>3</sub>)  $\delta$  -65.74. <sup>13</sup>C NMR (150 MHz, CDCl<sub>3</sub>)  $\delta$  166.3, 154.9, 142.0, 132.2, 130.3, 122.6 (q,  $J = 275.4$  Hz), 53.2, 38.2 (q,  $J = 39.0$  Hz). HRMS (ESI) calcd for C<sub>11</sub>H<sub>7</sub><sup>35</sup>ClF<sub>3</sub>NNaO<sub>2</sub><sup>+</sup> [M + Na<sup>+</sup>] 300.0010, found 300.0018.

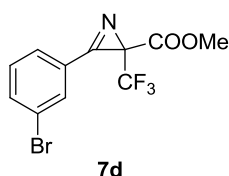

### Methyl 3-(3-bromophenyl)-2-(trifluoromethyl)-2H-azirine-2-carboxylate (**7d**)

Following the general procedure, **7d** was purified by silica gel chromatography (EtOAc/PE = 10/90). Yield: 209 mg, 65%, yellow oil. <sup>1</sup>H NMR (600 MHz, CDCl<sub>3</sub>)  $\delta$  8.04 (s, 1H), 7.85 (d,  $J = 7.1$  Hz, 2H), 7.52 (t,  $J = 7.8$  Hz, 2H), 3.82 (s, 3H). <sup>19</sup>F NMR (564 MHz, CDCl<sub>3</sub>)  $\delta$  -65.70. <sup>13</sup>C NMR (151 MHz, CDCl<sub>3</sub>)  $\delta$  166.19, 155.10, 138.10, 133.51, 131.23, 129.48, 123.71, 122.5 (q,  $J = 273.9$  Hz), 121.51, 53.32, 38.4 (q,  $J = 39.0$  Hz). HRMS (ESI) calcd for C<sub>11</sub>H<sub>7</sub><sup>79</sup>BrF<sub>3</sub>NNaO<sub>2</sub><sup>+</sup> [M + Na<sup>+</sup>] 343.9504, found 343.9511.

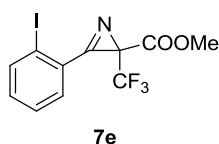

### Methyl 3-(2-iodophenyl)-2-(trifluoromethyl)-2H-azirine-2-carboxylate (**7e**)

Following the general procedure, **7e** was purified by silica gel chromatography (EtOAc/PE = 10/90). Yield: 192 mg, 52%, yellow solid, m.p. 65-66 °C. <sup>1</sup>H NMR (600 MHz, CDCl<sub>3</sub>)  $\delta$  8.10 (d,  $J = 8.0$  Hz, 1H), 7.77 (dd,  $J = 7.7, 1.5$  Hz, 1H), 7.60 (td,  $J = 7.6, 0.9$  Hz, 1H), 7.40 (td,  $J = 7.8, 1.6$  Hz, 1H), 3.82 (s, 3H). <sup>19</sup>F NMR (564 MHz, CDCl<sub>3</sub>)  $\delta$  -65.67. <sup>13</sup>C NMR (151 MHz, CDCl<sub>3</sub>)  $\delta$  166.5, 157.6, 141.3, 135.6, 134.7, 128.9, 124.0, 122.6 (q,  $J = 274.0$  Hz), 98.8, 53.25, 39.2 (q,  $J = 38.2$  Hz). HRMS (ESI) calcd for C<sub>11</sub>H<sub>7</sub>F<sub>3</sub><sup>127</sup>INNaO<sub>2</sub><sup>+</sup> [M + Na<sup>+</sup>] 391.9366, found 391.9374.

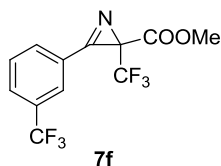

**Methyl 2-(trifluoromethyl)-3-(3-(trifluoromethyl)phenyl)-2H-azirine-2-carboxylate (7f)**

Following the general procedure, **7f** was purified by silica gel chromatography (EtOAc/PE = 10/90). Yield: 168 mg, 54%, yellow oil.  $^1\text{H}$  NMR (600 MHz,  $\text{CDCl}_3$ )  $\delta$  8.17 (s, 1H), 8.11 (d,  $J = 7.7$  Hz, 1H), 8.00 (d,  $J = 7.9$  Hz, 1H), 7.82 (t,  $J = 7.8$  Hz, 1H), 3.83 (s, 3H).  $^{19}\text{F}$  NMR (564 MHz,  $\text{CDCl}_3$ )  $\delta$  -63.17, -65.80.  $^{13}\text{C}$  NMR (150 MHz,  $\text{CDCl}_3$ )  $\delta$  166.2, 155.6, 134.1, 132.7 (q,  $J = 33.8$  Hz), 131.7 (q,  $J = 5.1$  Hz), 130.7, 127.6 (q,  $J = 3.7$  Hz), 123.1 (q,  $J = 272.8$  Hz), 122.6 (q,  $J = 275.4$  Hz), 120.8, 53.4, 38.6 (q,  $J = 39.2$  Hz). HRMS (ESI) calcd for  $\text{C}_{12}\text{H}_7\text{F}_6\text{NNaO}_2^+$  [ $\text{M} + \text{Na}^+$ ] 334.0273, found 334.0277.

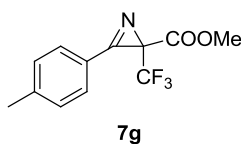

**Methyl 3-(*p*-tolyl)-2-(trifluoromethyl)-2H-azirine-2-carboxylate (7g)**

Following the general procedure, **7g** was purified by silica gel chromatography (EtOAc/PE = 10/90). Yield: 103 mg, 40%, yellow oil.  $^1\text{H}$  NMR (600 MHz,  $\text{CDCl}_3$ )  $\delta$  7.80 (d,  $J = 8.1$  Hz, 2H), 7.43 (d,  $J = 7.9$  Hz, 2H), 3.79 (s, 3H), 2.49 (s, 3H).  $^{19}\text{F}$  NMR (564 MHz,  $\text{CDCl}_3$ )  $\delta$  -65.71.  $^{13}\text{C}$  NMR (151 MHz,  $\text{CDCl}_3$ )  $\delta$  166.8, 154.9, 146.6, 131.1, 130.5, 122.8 (q,  $J = 273.6$  Hz), 116.7, 53.1, 37.8 (q,  $J = 38.9$  Hz), 22.1. HRMS (ESI) calcd for  $\text{C}_{12}\text{H}_{10}\text{F}_3\text{NNaO}_2^+$  [ $\text{M} + \text{Na}^+$ ] 280.0556, found 280.0556.

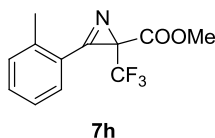

**Methyl 3-(*o*-tolyl)-2-(trifluoromethyl)-2H-azirine-2-carboxylate (7h)**

Following the general procedure, **7h** was purified by silica gel chromatography

(EtOAc/PE = 10/90). Yield: 172 mg, 67%, yellow solid, m.p. 53-54 °C. <sup>1</sup>H NMR (600 MHz, CDCl<sub>3</sub>) δ 7.72 – 7.56 (m, 2H), 7.51 – 7.36 (m, 2H), 3.80 (s, 3H), 2.75 (s, 3H). <sup>19</sup>F NMR (564 MHz, CDCl<sub>3</sub>) δ -65.66. <sup>13</sup>C NMR (150 MHz, CDCl<sub>3</sub>) δ 166.9, 154.4, 142.8, 134.8, 132.9, 131.4, 126.8, 122.9 (q, *J* = 273.5 Hz), 118.5, 53.2, 36.4 (q, *J* = 38.2 Hz), 20.1. HRMS (ESI) calcd for C<sub>12</sub>H<sub>10</sub>F<sub>3</sub>NNaO<sub>2</sub><sup>+</sup> [M + Na<sup>+</sup>] 280.0556, found 280.0558.

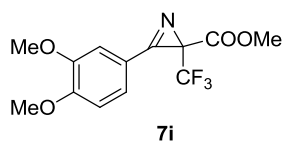

**Methyl 3-(3,4-dimethoxyphenyl)-2-(trifluoromethyl)-2H-azirine-2-carboxylate (7i)**

Following the general procedure, **7i** was purified by silica gel chromatography (EtOAc/PE = 10/90). Yield: 154 mg, 51%, yellow oil. <sup>1</sup>H NMR (600 MHz, CDCl<sub>3</sub>) δ 7.44 (td, *J* = 4.3, 1.8 Hz, 2H), 7.12 – 6.95 (m, 1H), 4.00 (s, 3H), 3.98 (s, 3H), 3.80 (s, 3H). <sup>19</sup>F NMR (564 MHz, CDCl<sub>3</sub>) δ -65.75. <sup>13</sup>C NMR (150 MHz, CDCl<sub>3</sub>) δ 166.9, 154.9, 154.2, 150.0, 126.5, 122.9 (q, *J* = 273.7 Hz), 111.9, 111.6, 111.4, 56.3, 56.2, 53.1, 38.1 (q, *J* = 38.2 Hz). HRMS (ESI) calcd for C<sub>13</sub>H<sub>12</sub>F<sub>3</sub>NNaO<sub>4</sub><sup>+</sup> [M + Na<sup>+</sup>] 326.0611, found 326.0605.

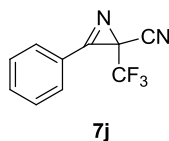

**3-Phenyl-2-(trifluoromethyl)-2H-azirine-2-carbonitrile (7j)**

Following the general procedure, **7j** was purified by silica gel chromatography (EtOAc/PE = 10/90). Yield: 103 mg, 49%, yellow oil. <sup>1</sup>H NMR (600 MHz, CDCl<sub>3</sub>) δ 7.97 (d, *J* = 7.5 Hz, 2H), 7.83 (t, *J* = 7.5 Hz, 1H), 7.71 (t, *J* = 7.5 Hz, 2H). <sup>19</sup>F NMR (564 MHz, CDCl<sub>3</sub>) δ -67.89. <sup>13</sup>C NMR (150 MHz, CDCl<sub>3</sub>) δ 156.3, 136.4, 131.5, 130.2, 121.1 (q, *J* = 274.4 Hz), 118.0, 114.2, 27.2 (q, *J* = 46.1 Hz). HRMS (ESI) calcd for C<sub>10</sub>H<sub>5</sub>F<sub>3</sub>N<sub>2</sub>Na<sup>+</sup> [M + Na<sup>+</sup>] 233.0297, found 233.0296.

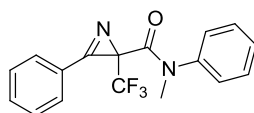

7k

***N*-Methyl-*N*,3-diphenyl-2-(trifluoromethyl)-2*H*-azirine-2-carboxamide (7k)**

Following the general procedure, **7k** was purified by silica gel chromatography (EtOAc/PE = 10/90). Yield: 181 mg, 57%, yellow solid, m.p. 55-56 °C. <sup>1</sup>H NMR (600 MHz, CDCl<sub>3</sub>) δ 7.76 (s, 2H), 7.62 (t, *J* = 7.3 Hz, 1H), 7.50 (t, *J* = 7.2 Hz, 2H), 7.31 (t, *J* = 7.2 Hz, 2H), 7.24 (t, *J* = 7.3 Hz, 1H), 7.17 (d, *J* = 7.4 Hz, 2H), 3.31 (s, 3H). <sup>19</sup>F NMR (564 MHz, CDCl<sub>3</sub>) δ -65.77. <sup>13</sup>C NMR (150 MHz, CDCl<sub>3</sub>) δ 164.8, 141.7, 134.4, 130.80, 129.5, 129.2, 128.1, 127.5, 123.3 (q, *J* = 275.6 Hz), 120.6, 40.0 (q, *J* = 38.1 Hz), 39.04. HRMS (ESI) calcd for C<sub>17</sub>H<sub>13</sub>F<sub>3</sub>N<sub>2</sub>NaO<sup>+</sup> [M + Na<sup>+</sup>] 341.0872, found 341.0876.

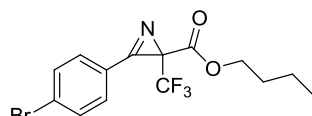

7l

***n*-Butyl 3-(4-bromophenyl)-2-(trifluoromethyl)-2*H*-azirine-2-carboxylate (7l)**

Following the general procedure, **7l** was purified by silica gel chromatography (EtOAc/PE = 10/90). Yield: 225 mg, 62%, yellow oil. <sup>1</sup>H NMR (400 MHz, DMSO) δ 8.16 – 7.91 (m, 4H), 4.19 (td, *J* = 6.4, 2.3 Hz, 2H), 1.54 (dt, *J* = 14.4, 6.5 Hz, 2H), 1.33 – 1.10 (m, 2H), 0.83 (t, *J* = 7.4 Hz, 3H). <sup>19</sup>F NMR (375 MHz, DMSO) δ -64.78. <sup>13</sup>C NMR (100MHz, DMSO) δ 165.6, 155.3, 134.0, 133.3, 130.9, 123.2 (q, *J* = 273.6 Hz) 118.0, 66.5, 37.8 (q, *J* = 37.6 Hz) 30.2, 18.8, 13.8. HRMS (ESI) calcd for C<sub>14</sub>H<sub>13</sub><sup>79</sup>BrF<sub>3</sub>NNaO<sub>2</sub><sup>+</sup> [M + Na<sup>+</sup>] 385.9974, found 385.9984.

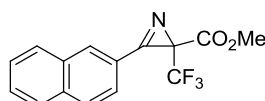

7m

**Methyl 3-(naphthalen-2-yl)-2-(trifluoromethyl)-2*H*-azirine-2-carboxylate (7m)**

Following the general procedure, **7m** was purified by silica gel chromatography

(EtOAc/PE = 10/90). Yield: 126 mg, 43%, yellow solid, m.p. 90-91 °C. <sup>1</sup>H NMR (600 MHz, CDCl<sub>3</sub>) δ 8.33 (s, 1H), 8.07 (d, *J* = 8.5 Hz, 1H), 8.00 (t, *J* = 8.5 Hz, 2H), 7.96 (d, *J* = 8.2 Hz, 1H), 7.71 (t, *J* = 7.6 Hz, 1H), 7.68 – 7.59 (m, 1H), 3.81 (s, 3H). <sup>19</sup>F NMR (564 MHz, CDCl<sub>3</sub>) δ -65.59. <sup>13</sup>C NMR (150 MHz, CDCl<sub>3</sub>) δ 166.9, 155.7, 136.5, 134.1, 132.8, 130.1, 130.0, 129.6, 128.4, 128.0, 125.0, 123.0 (q, *J* = 273.5 Hz), 116.9, 53.3, 38.3 (q, *J* = 38.5 Hz). HRMS (ESI) calcd for C<sub>15</sub>H<sub>10</sub>F<sub>3</sub>NNaO<sub>2</sub><sup>+</sup> [M + Na<sup>+</sup>] 316.0556, found 316.0550.

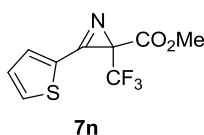

### **Methyl 3-(thiophen-2-yl)-2-(trifluoromethyl)-2H-azirine-2-carboxylate (7n)**

Following the general procedure, **7n** was purified by silica gel chromatography (EtOAc/PE = 10/90). Yield: 112 mg, 45%, yellow solid, m.p. 86-87 °C. <sup>1</sup>H NMR (600 MHz, CDCl<sub>3</sub>) δ 8.01 (d, *J* = 5.0 Hz, 1H), 7.77 (d, *J* = 3.8 Hz, 1H), 7.35 – 7.30 (m, 1H), 3.81 (s, 3H). <sup>19</sup>F NMR (564 MHz, CDCl<sub>3</sub>) δ -66.05. <sup>13</sup>C NMR (150 MHz, CDCl<sub>3</sub>) δ 166.5, 148.9, 137.8, 137.4, 129.2, 122.7 (q, *J* = 274.0 Hz), 121.3, 53.3, 38.7 (q, *J* = 38.6 Hz). HRMS (ESI) calcd for C<sub>9</sub>H<sub>6</sub>F<sub>3</sub>NNaO<sub>2</sub>S<sup>+</sup> [M + Na<sup>+</sup>] 271.9964, found 271.9956.

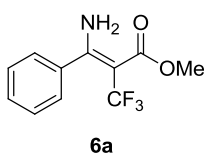

### **(E)-Methyl 3-amino-3-phenyl-2-(trifluoromethyl)acrylate (6a)**

Following the above procedure, **6a** was purified by silica gel chromatography (EtOAc/PE = 10/90). Yield: 56 mg, 23%, yellow oil. <sup>1</sup>H NMR (600 MHz, CDCl<sub>3</sub>) δ 9.31 (brs, 1H), 7.47 – 7.40 (m, 3H), 7.37 (d, *J* = 7.5 Hz, 2H), 5.02 (brs, 1H), 3.83 (s, 3H). <sup>19</sup>F NMR (564 MHz, CDCl<sub>3</sub>) δ -50.4. <sup>13</sup>C NMR (150 MHz, CDCl<sub>3</sub>) δ 168.4, 164.7, 137.3, 130.0, 128.4, 126.9 (d, *J* = 1.5 Hz), 125.1 (q, *J* = 267.6 Hz), 89.0 (q, *J* = 32.3 Hz), 51.5. HRMS (ESI) calcd for C<sub>10</sub>H<sub>11</sub>F<sub>3</sub>NNaO<sub>2</sub><sup>+</sup> [M + Na<sup>+</sup>] 268.0556, found 268.0562.

$^1\text{H}$  NMR,  $^{19}\text{F}$  NMR and  $^{13}\text{C}$  NMR spectra of **7** and intermediate **6a**

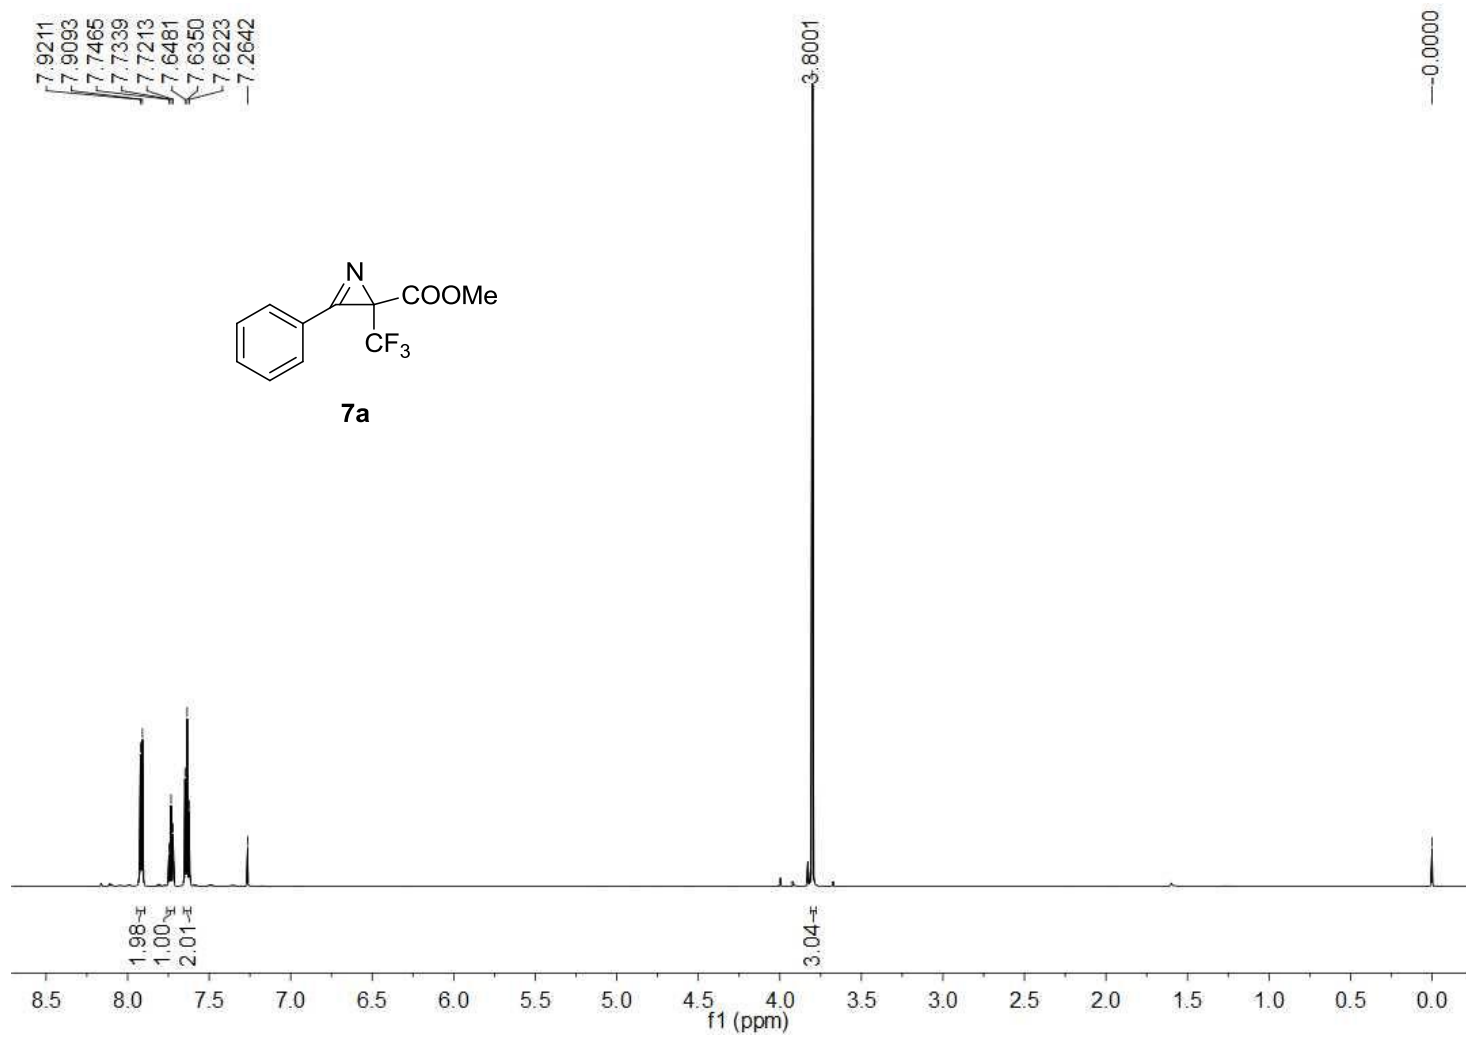

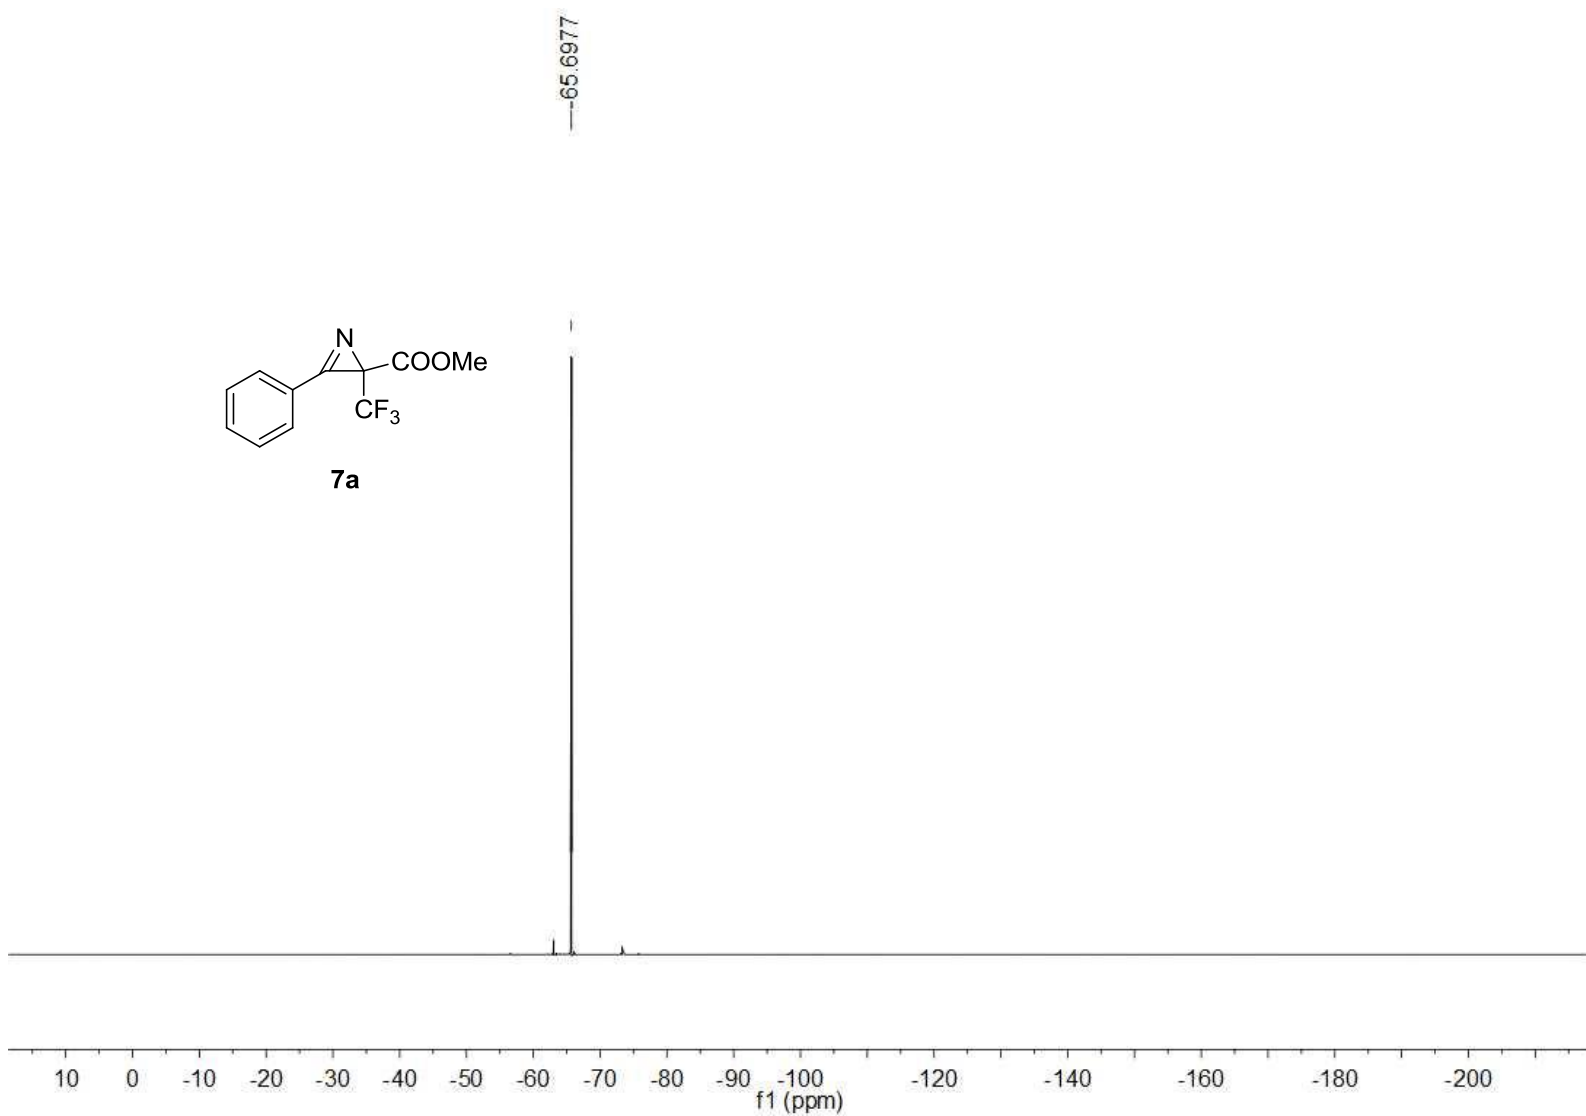

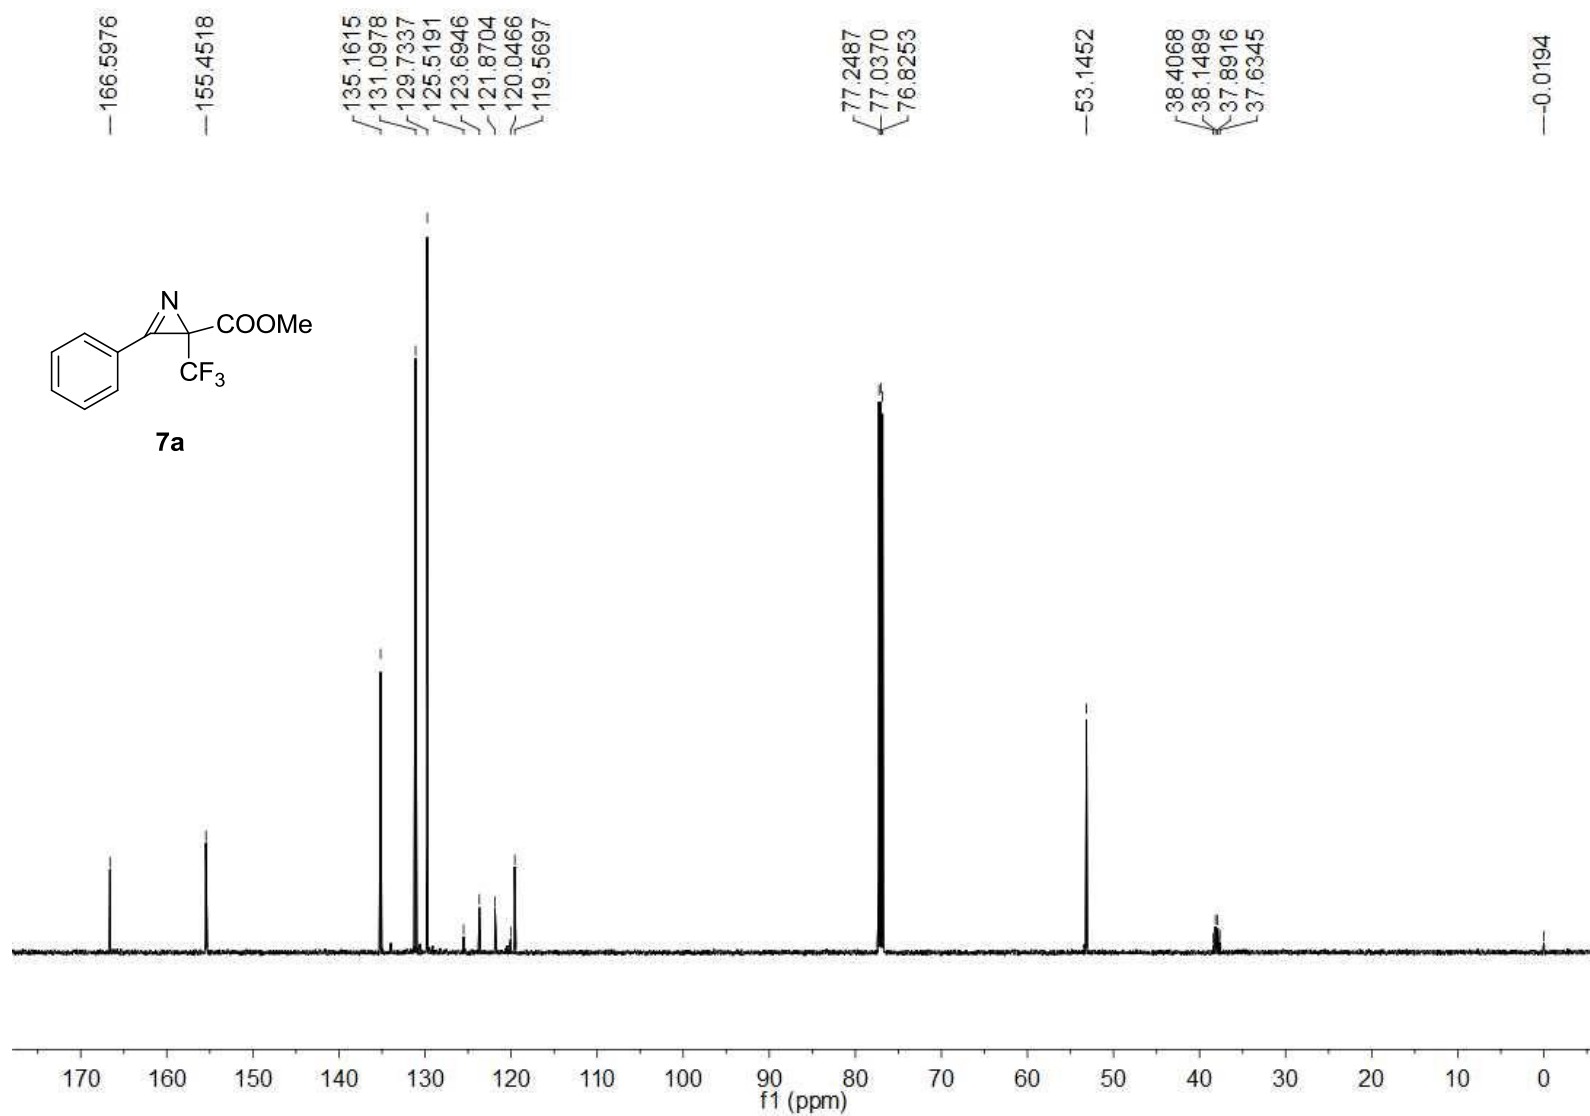



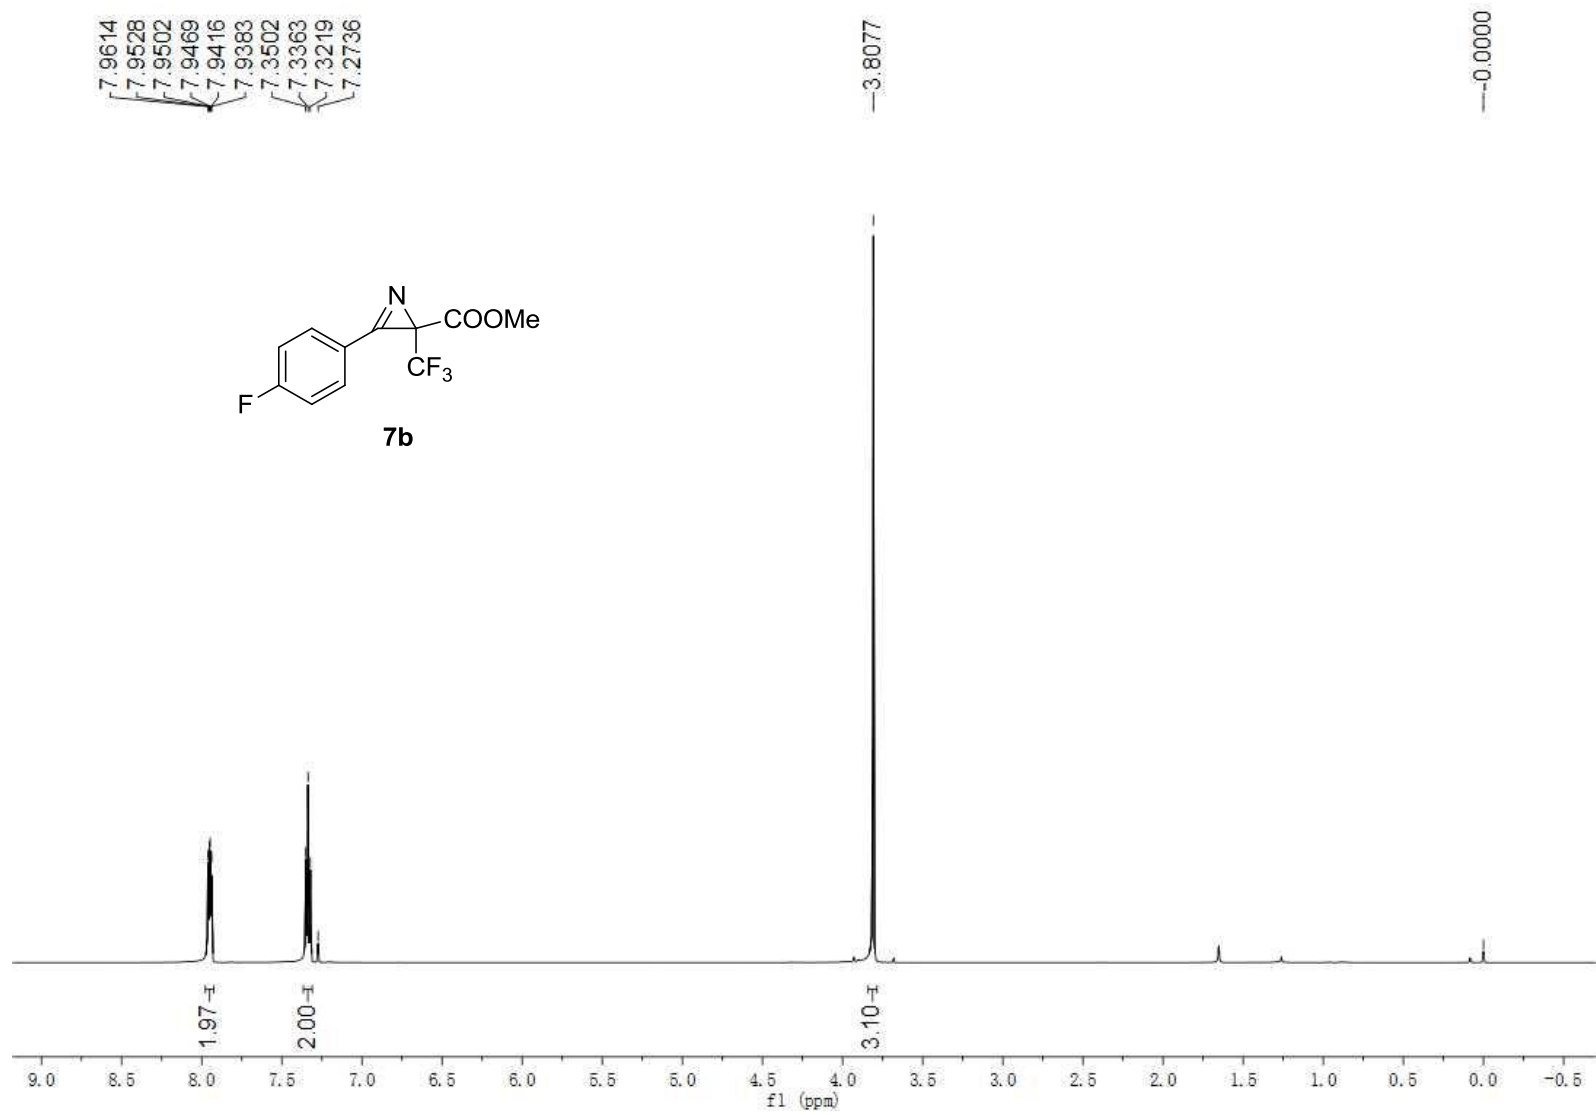

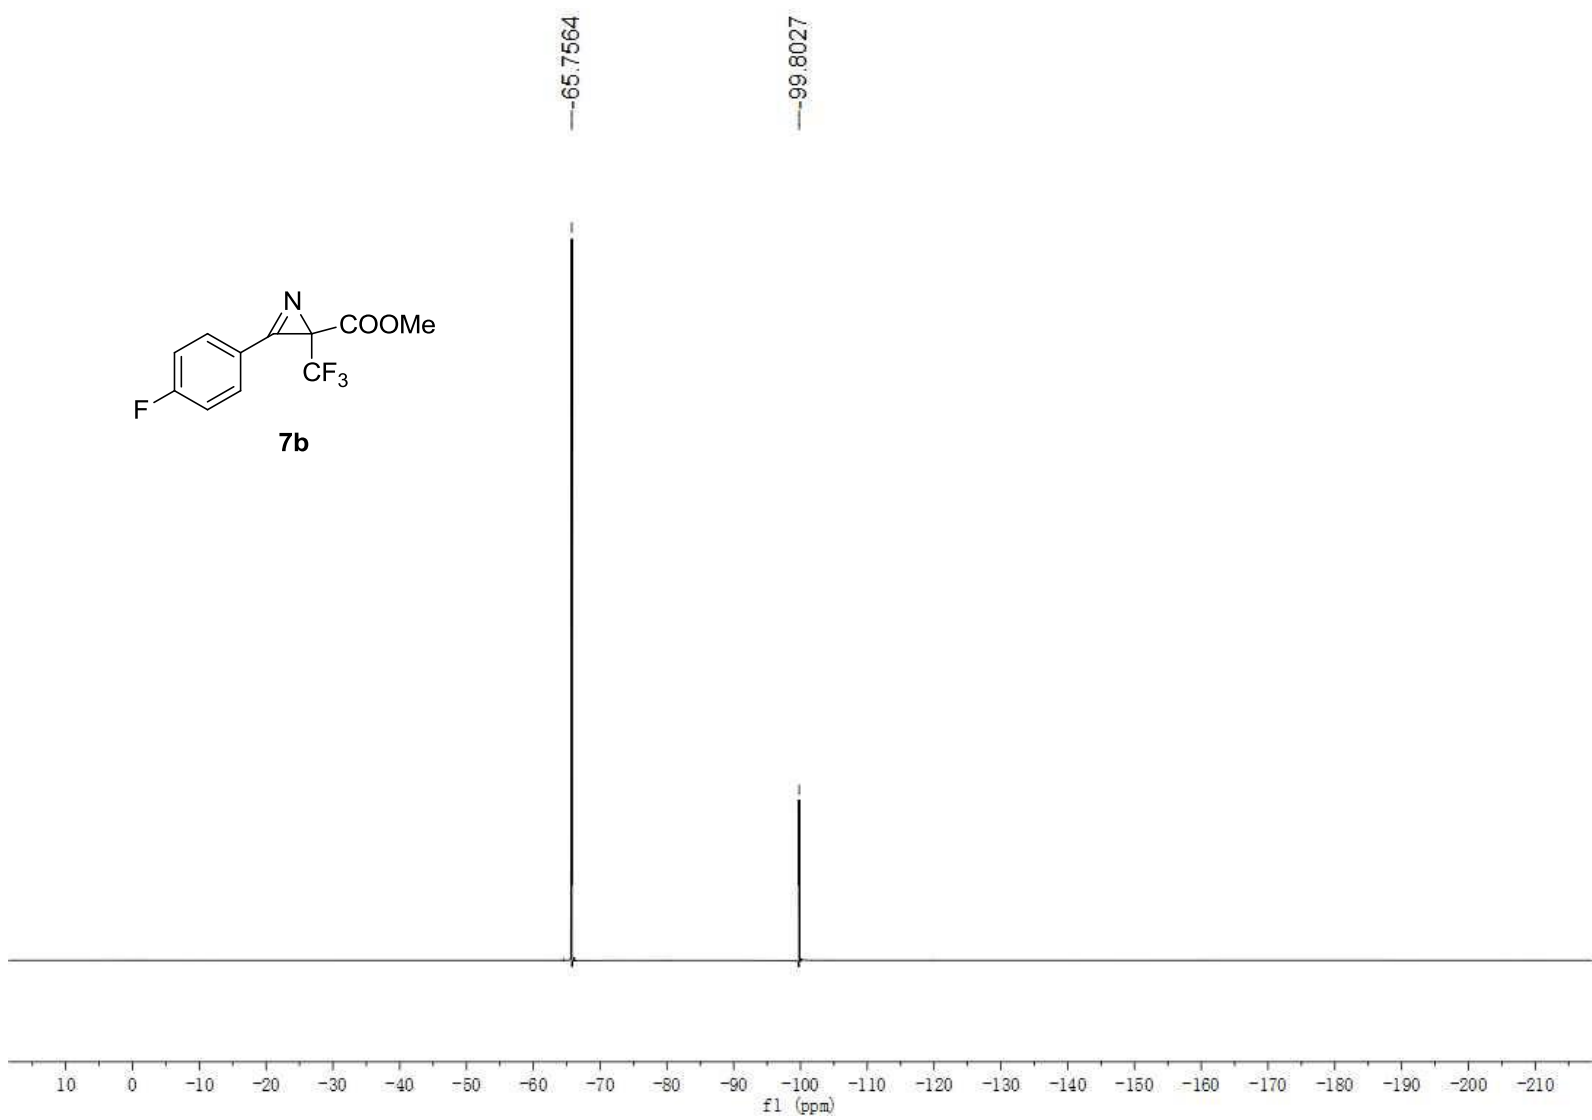

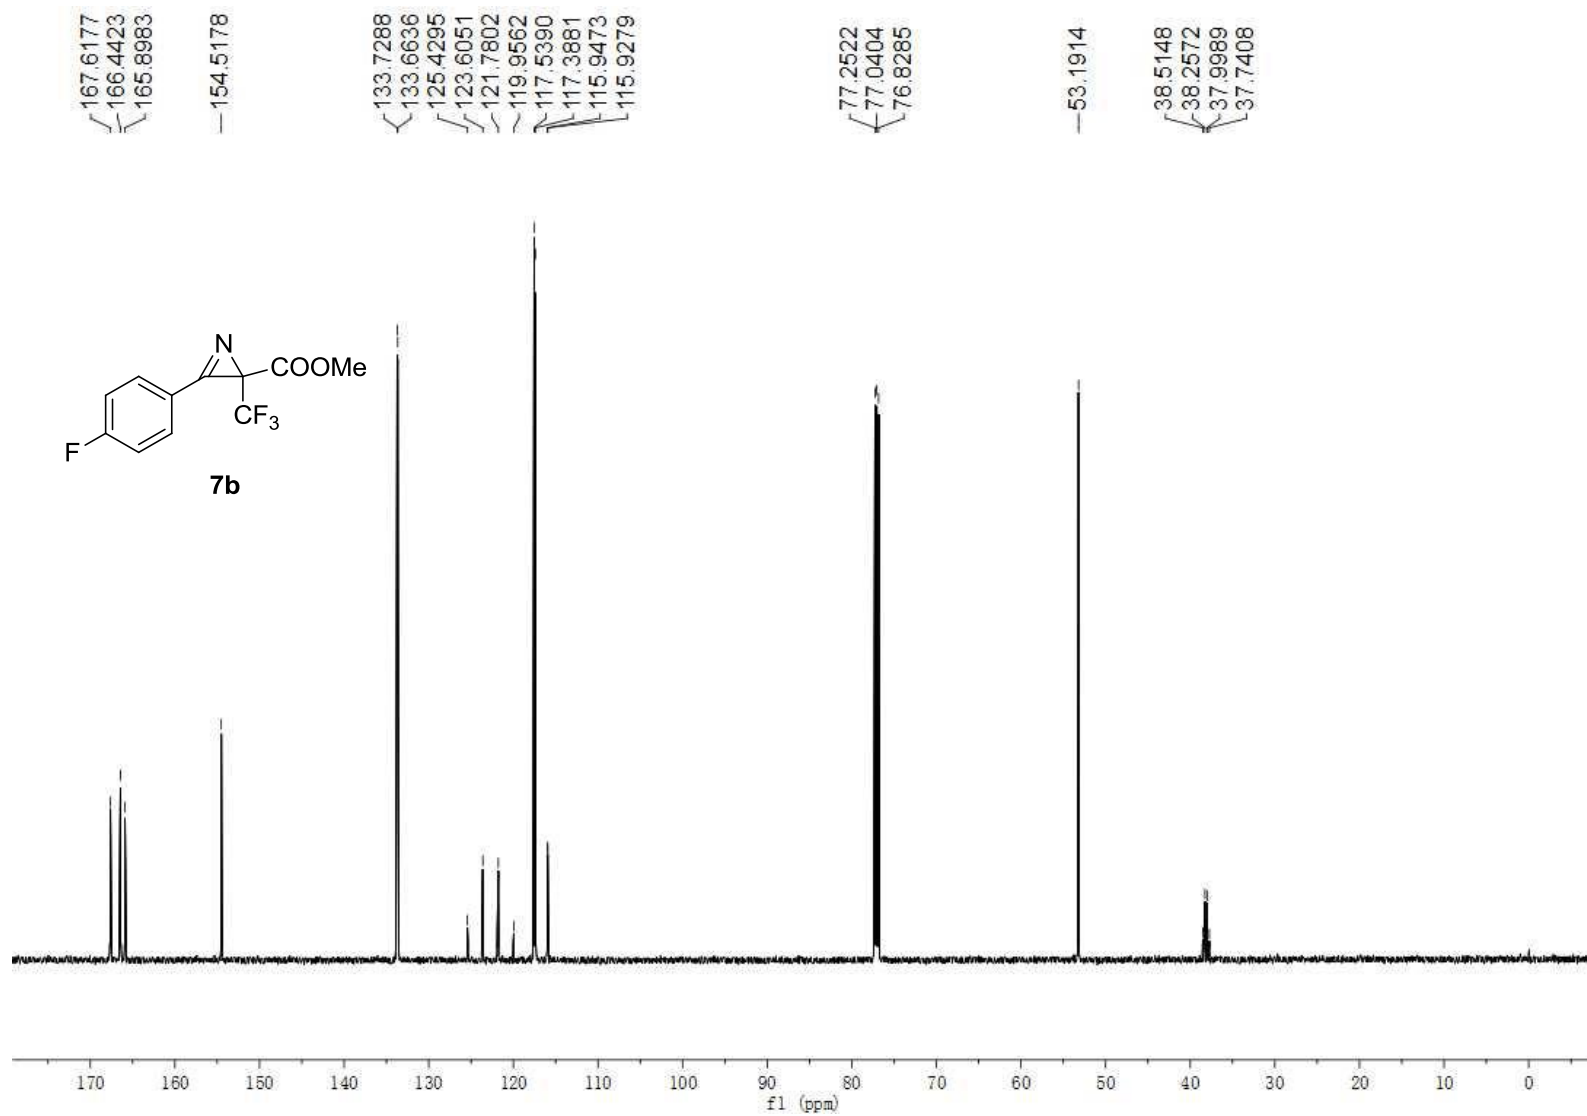

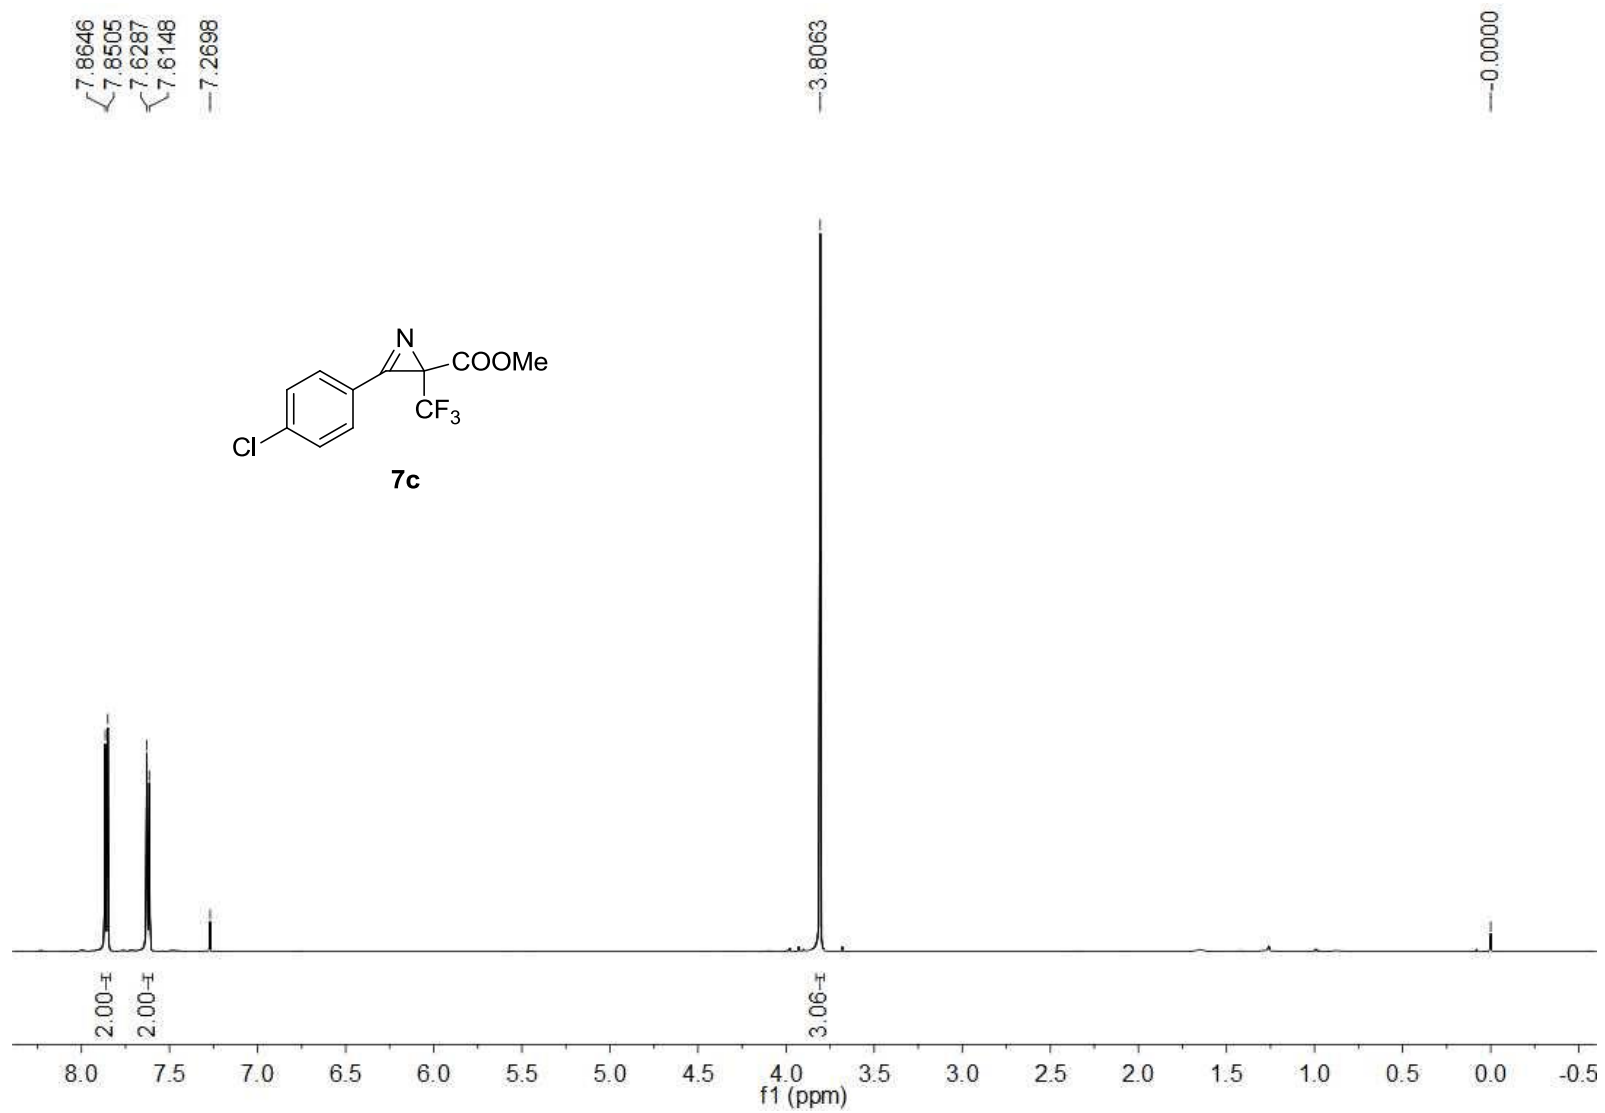

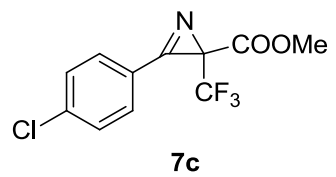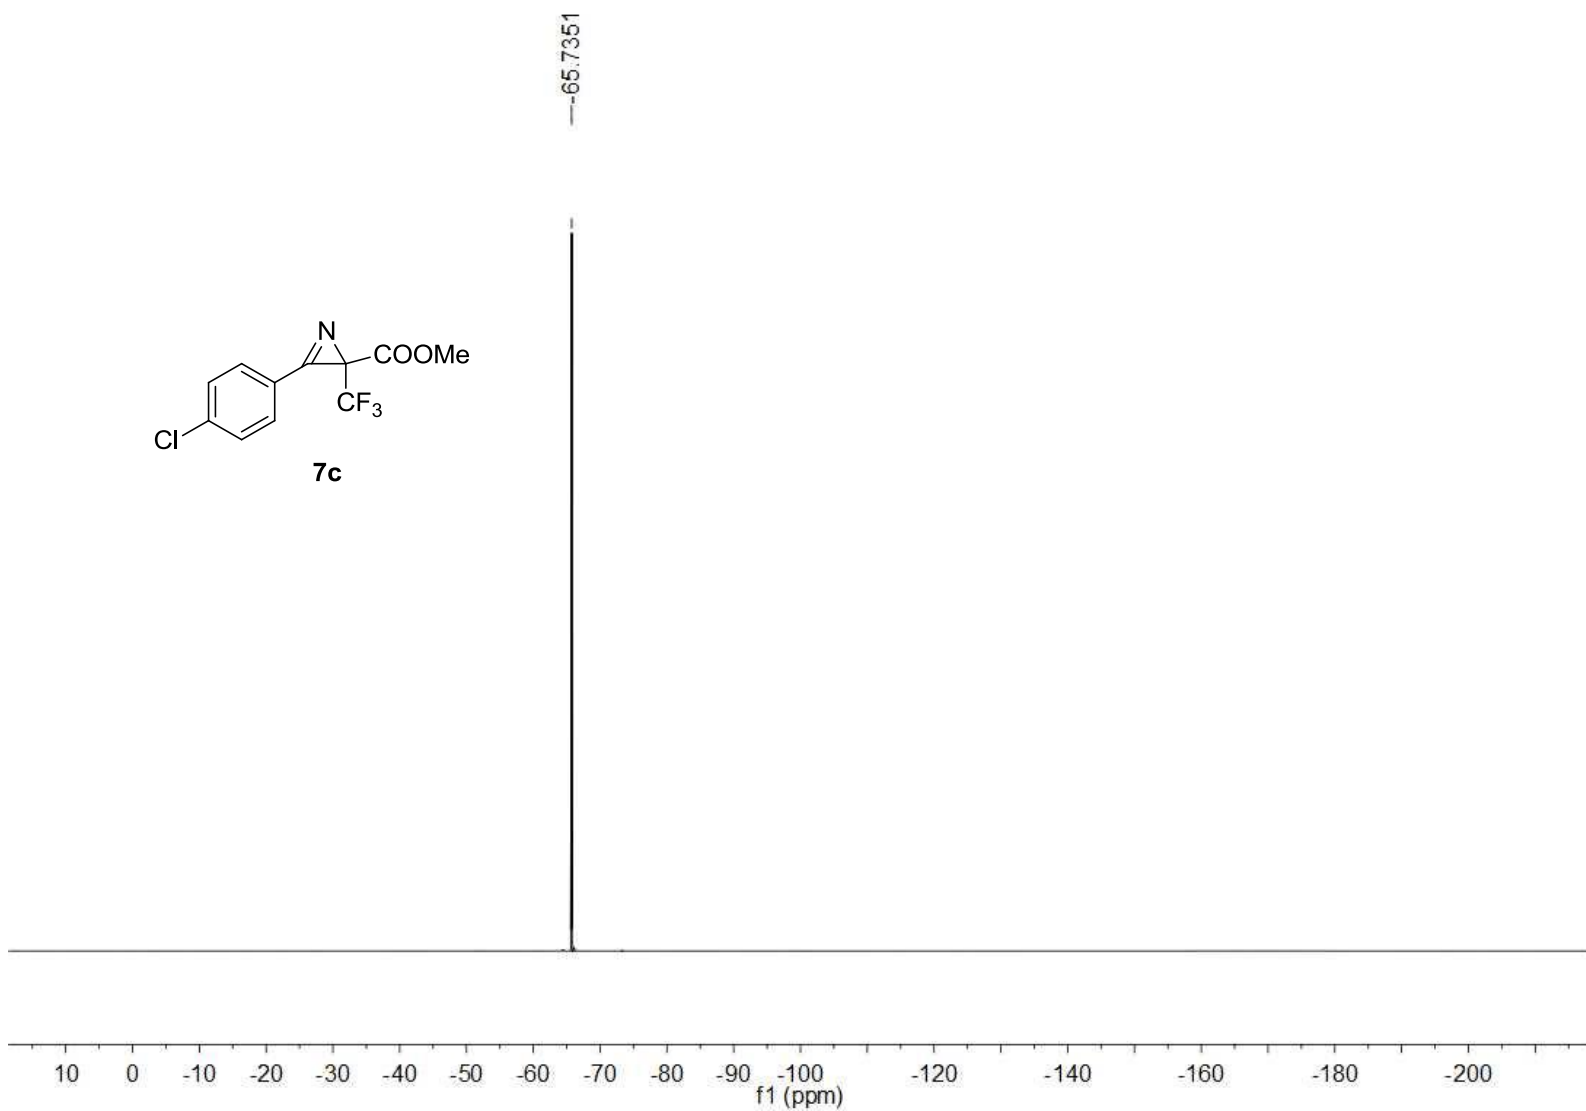

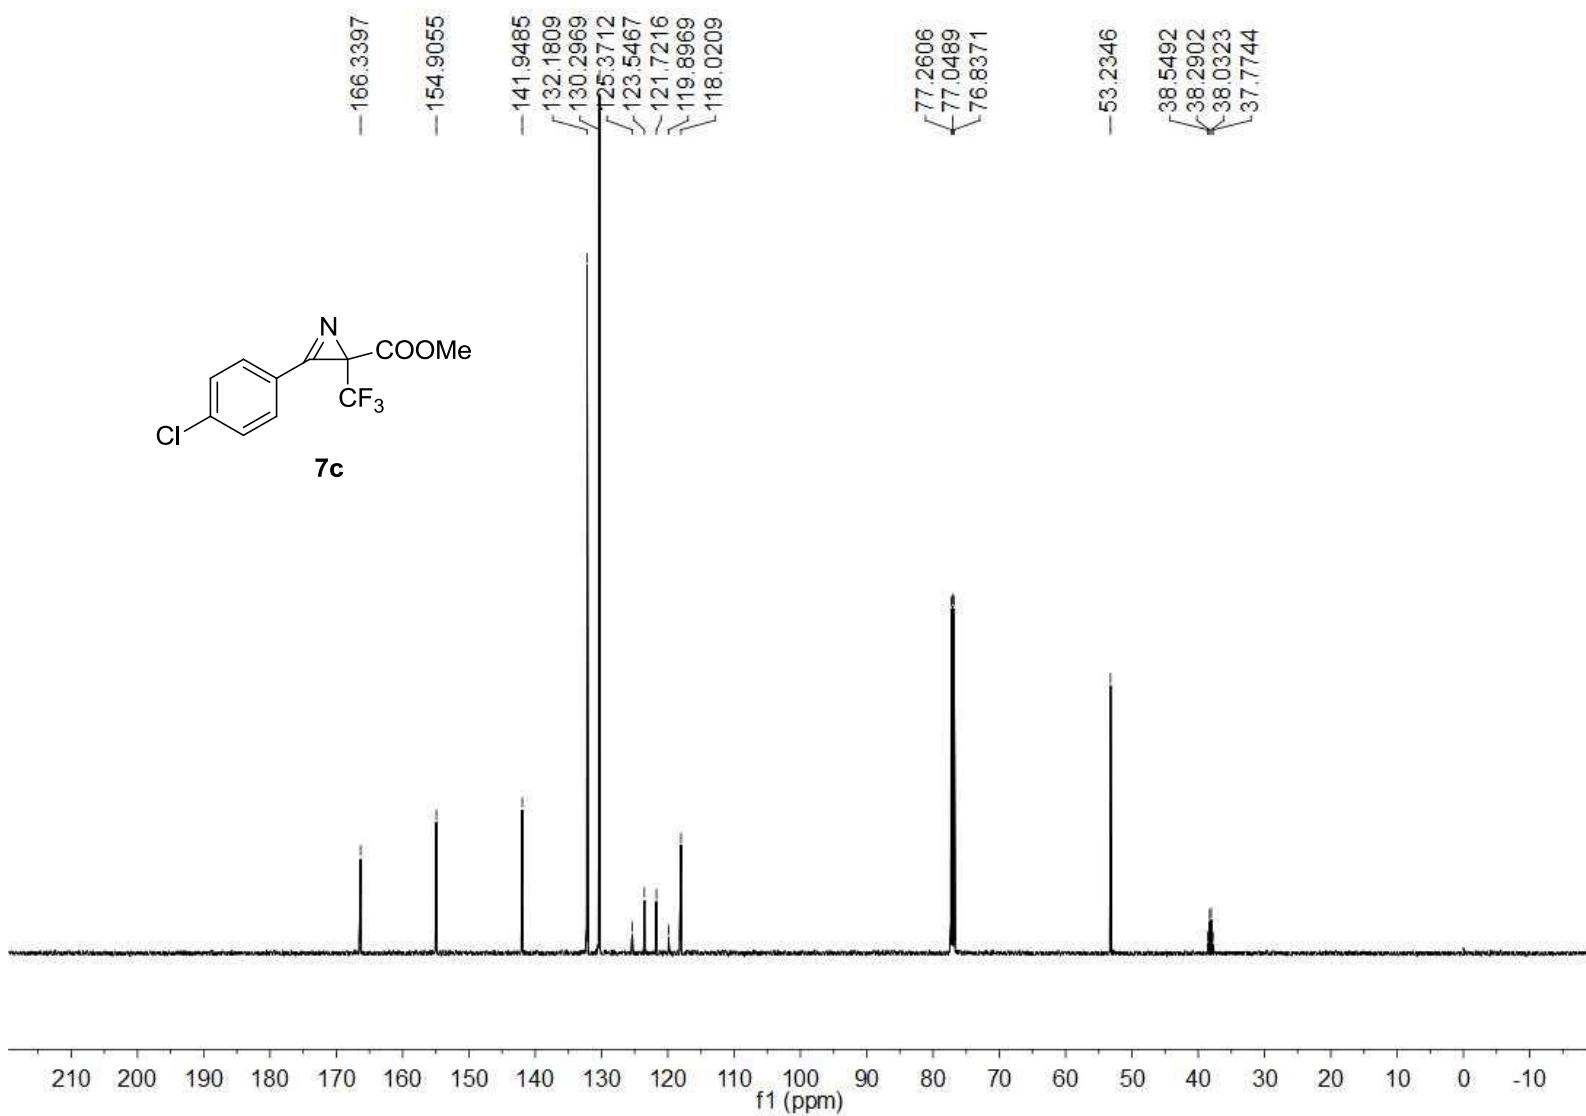

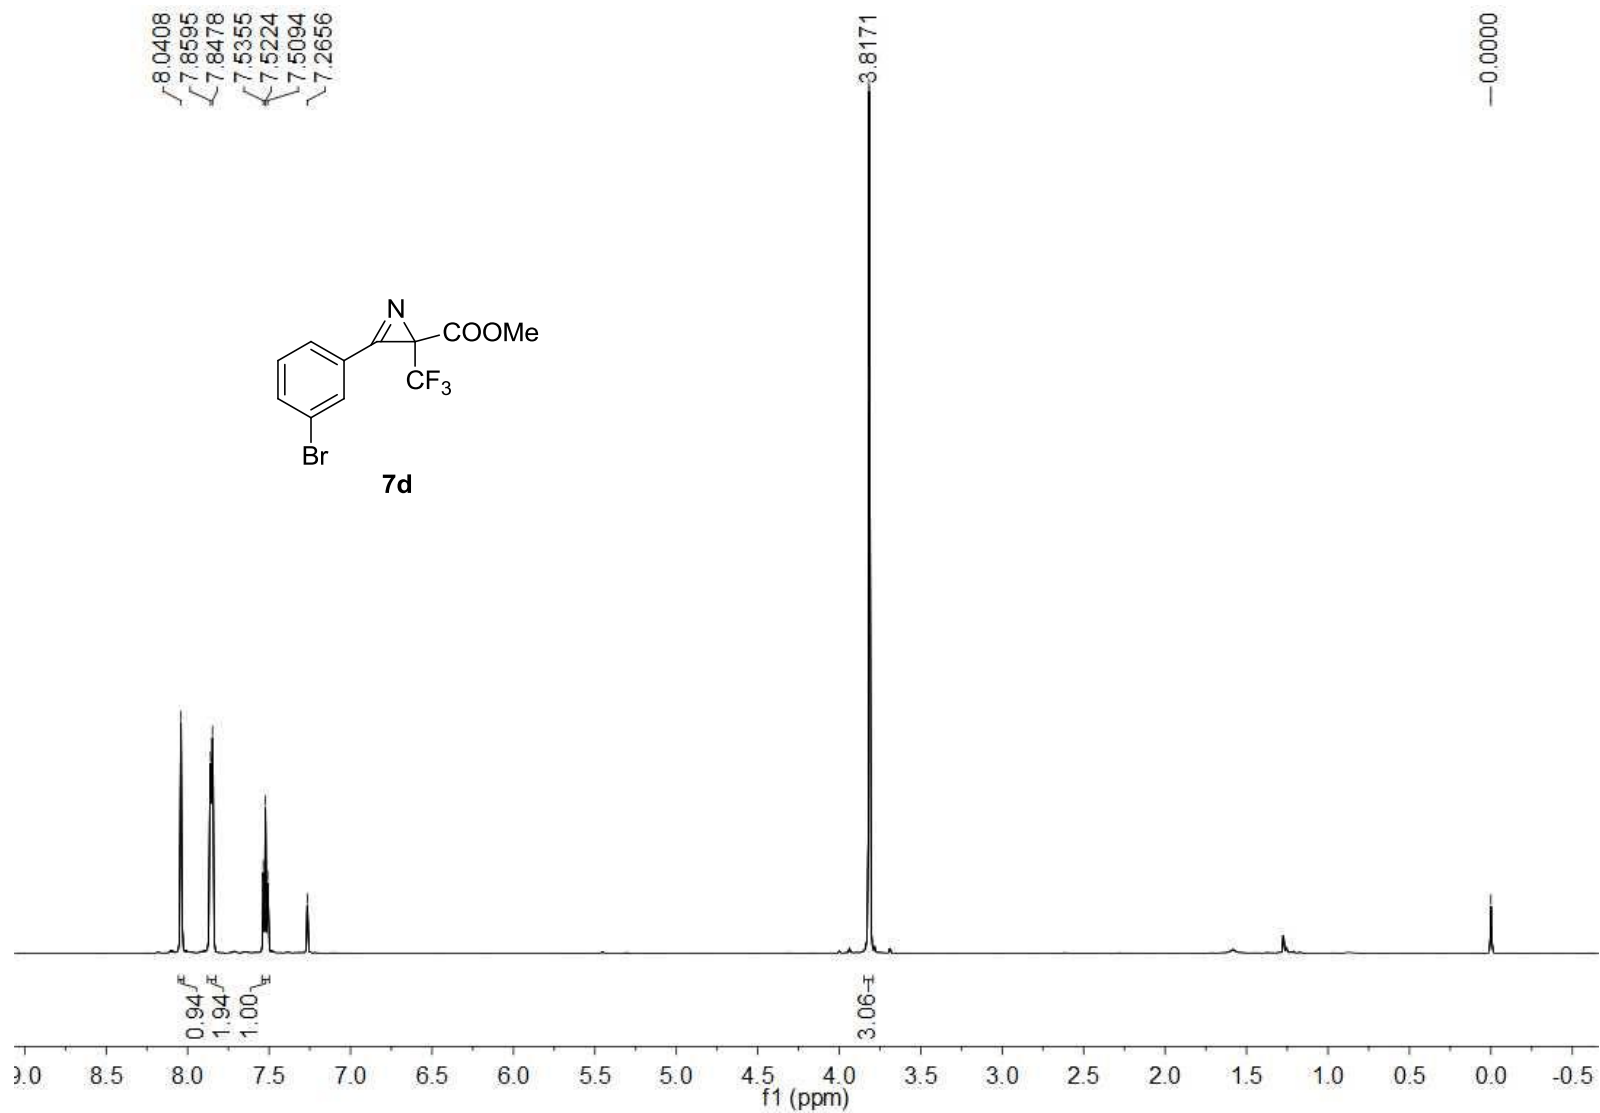

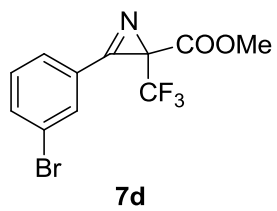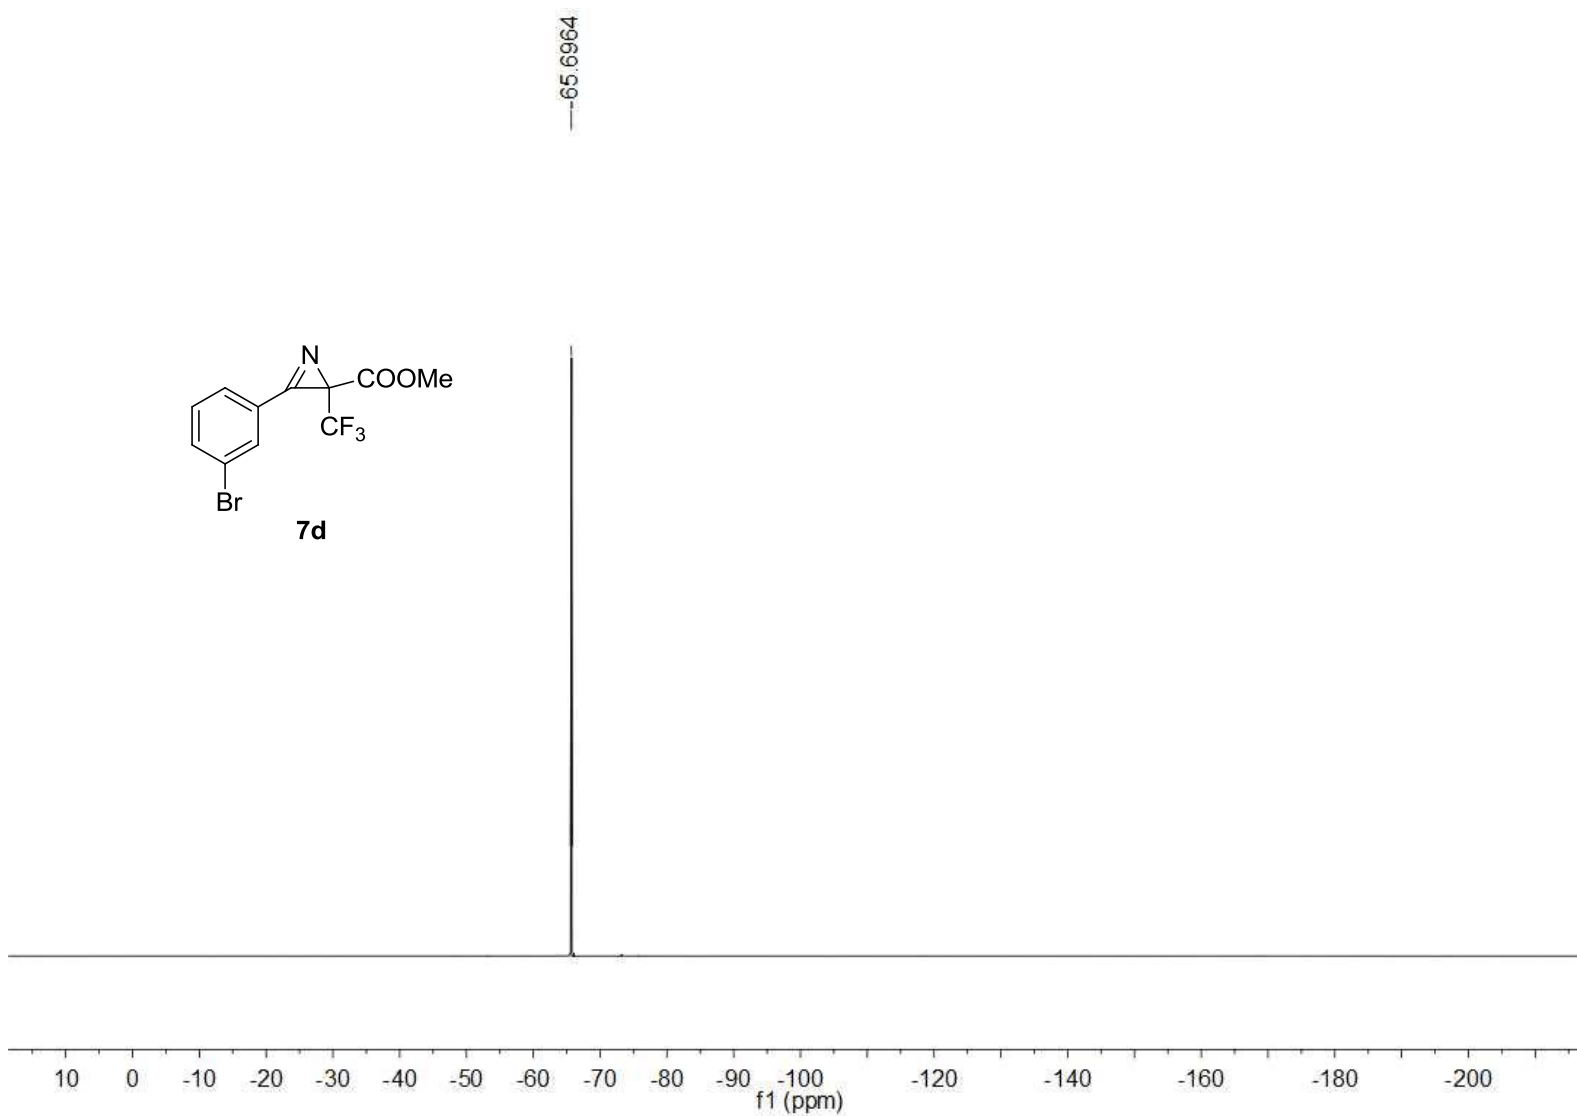



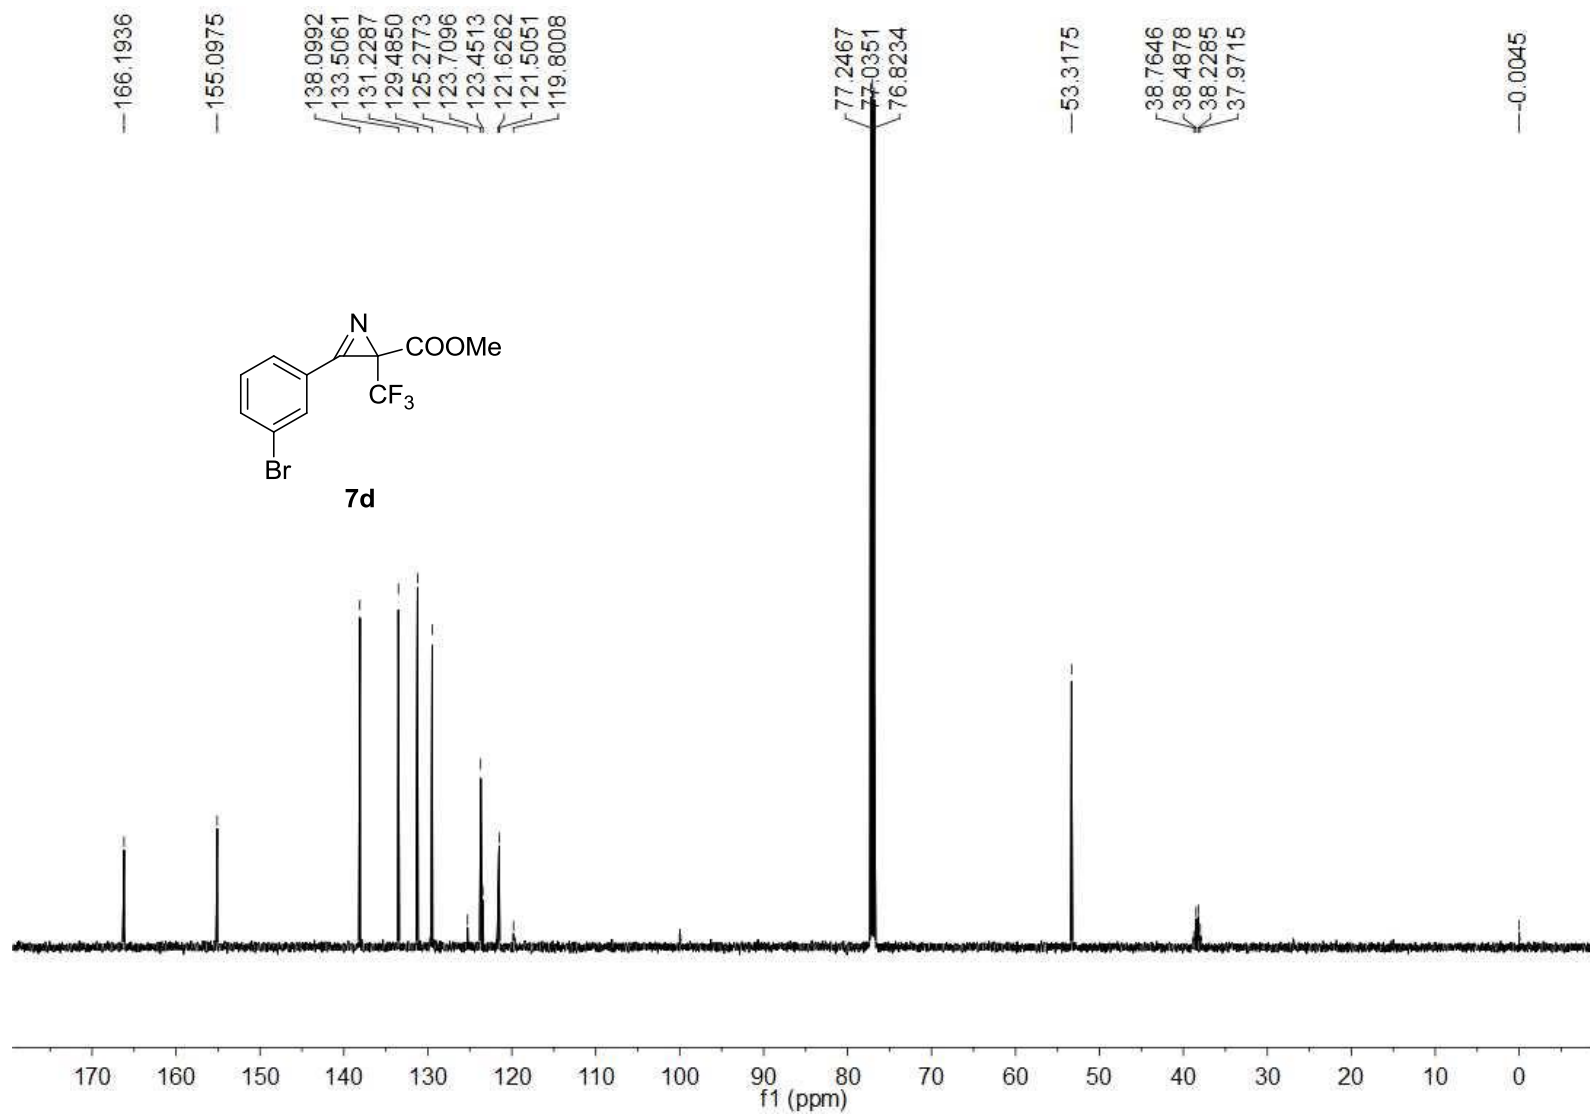

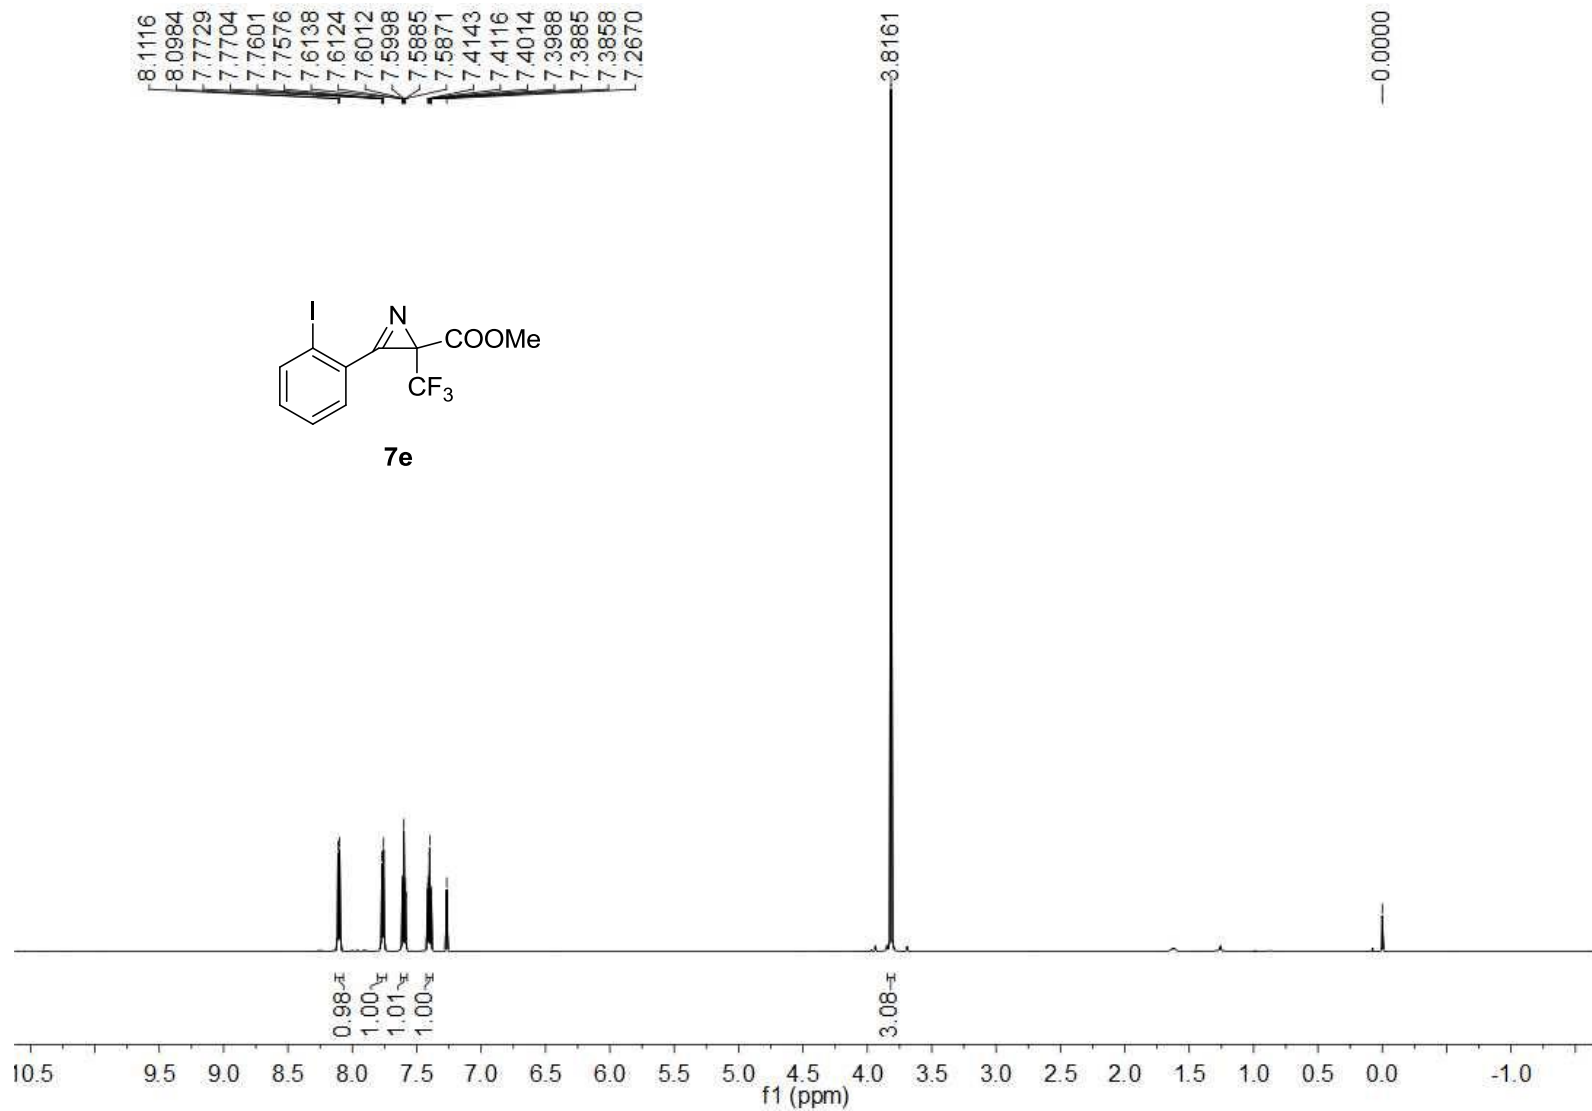

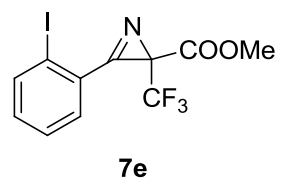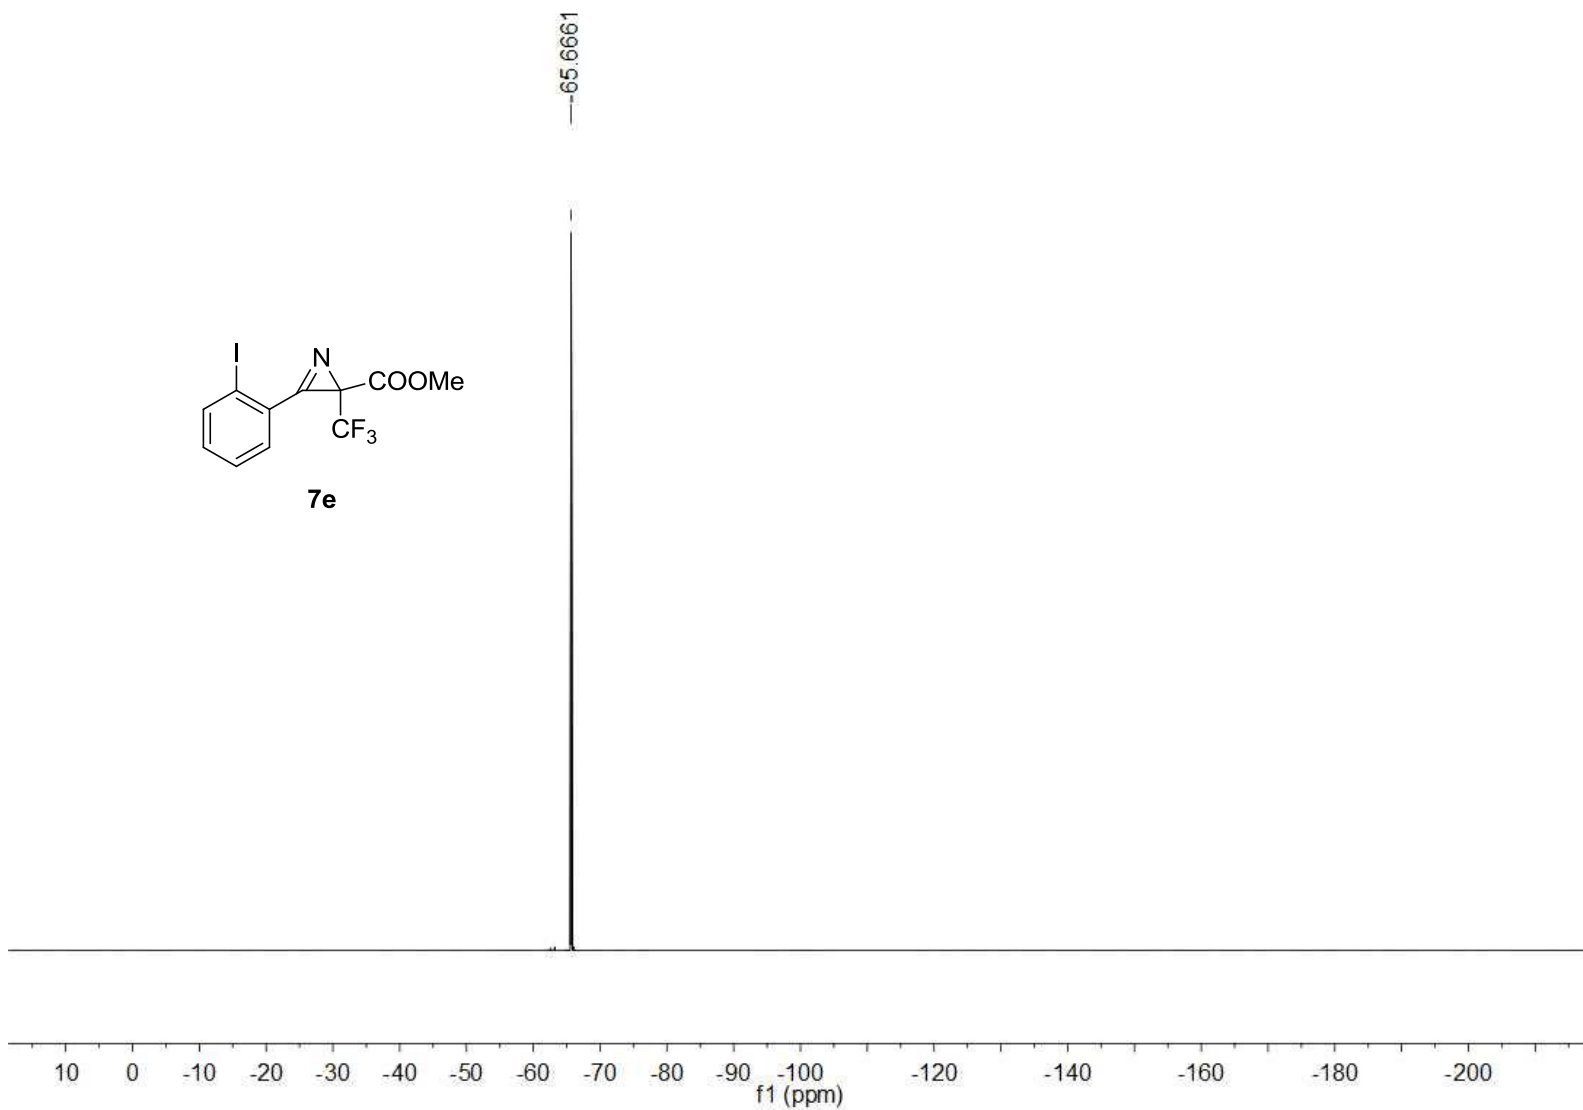

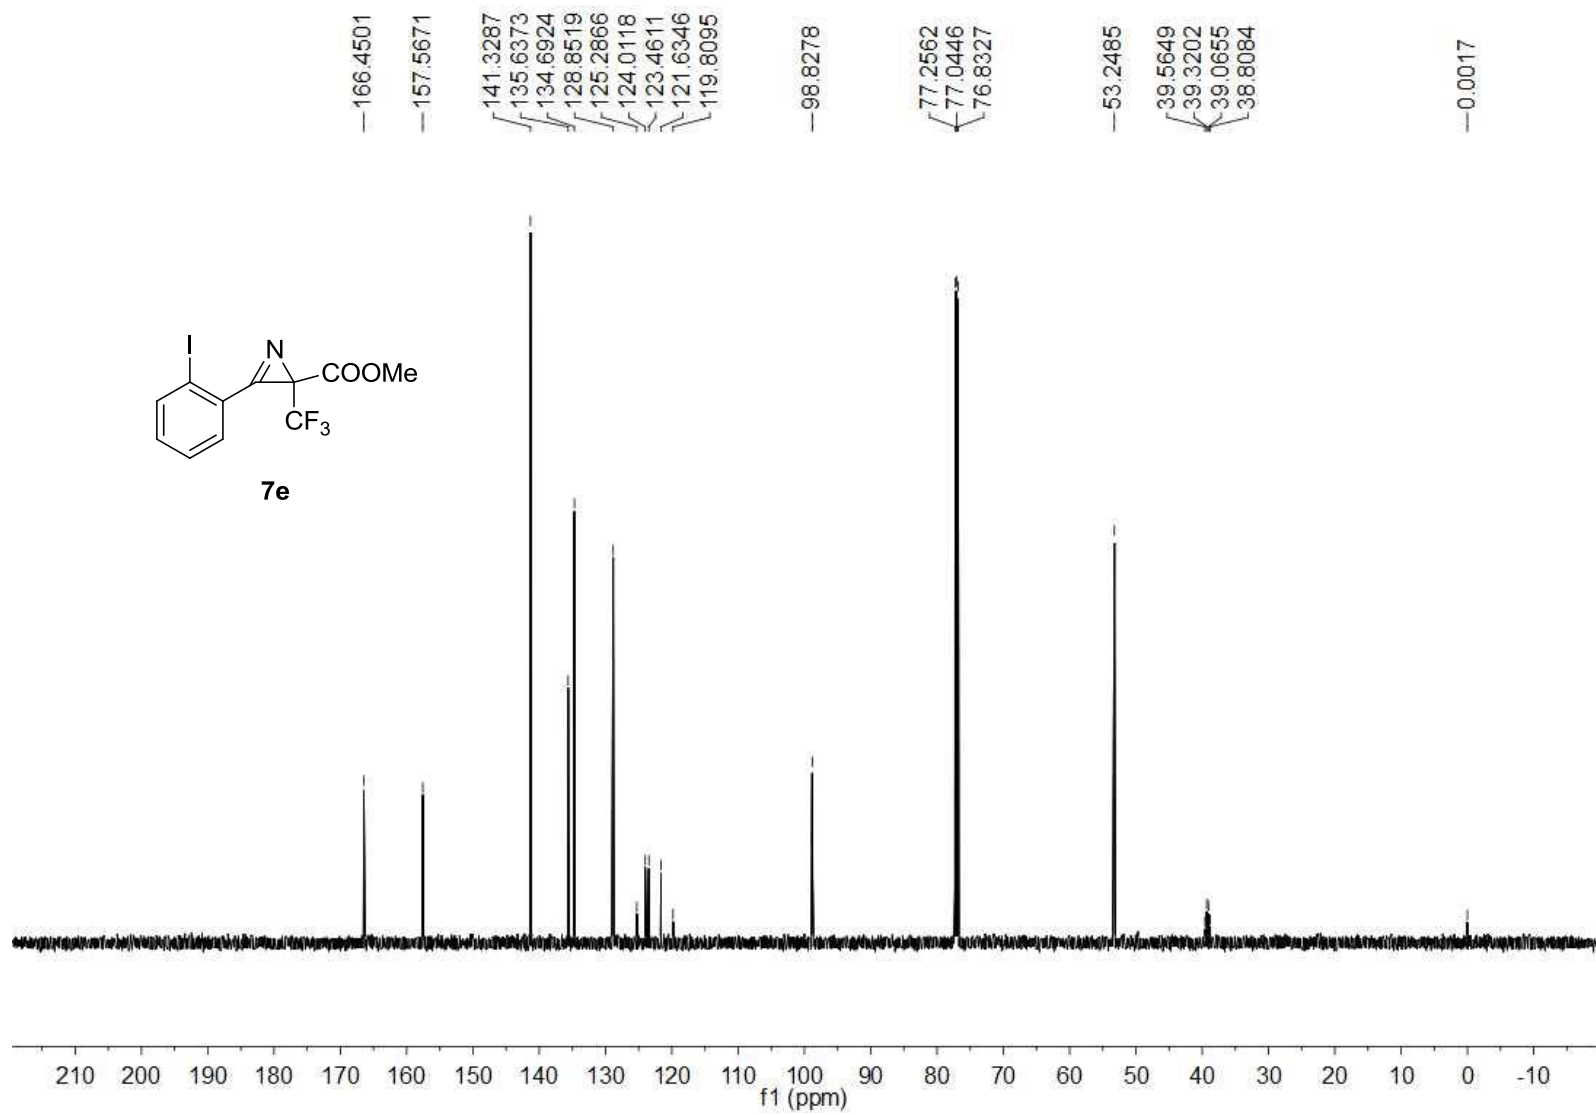

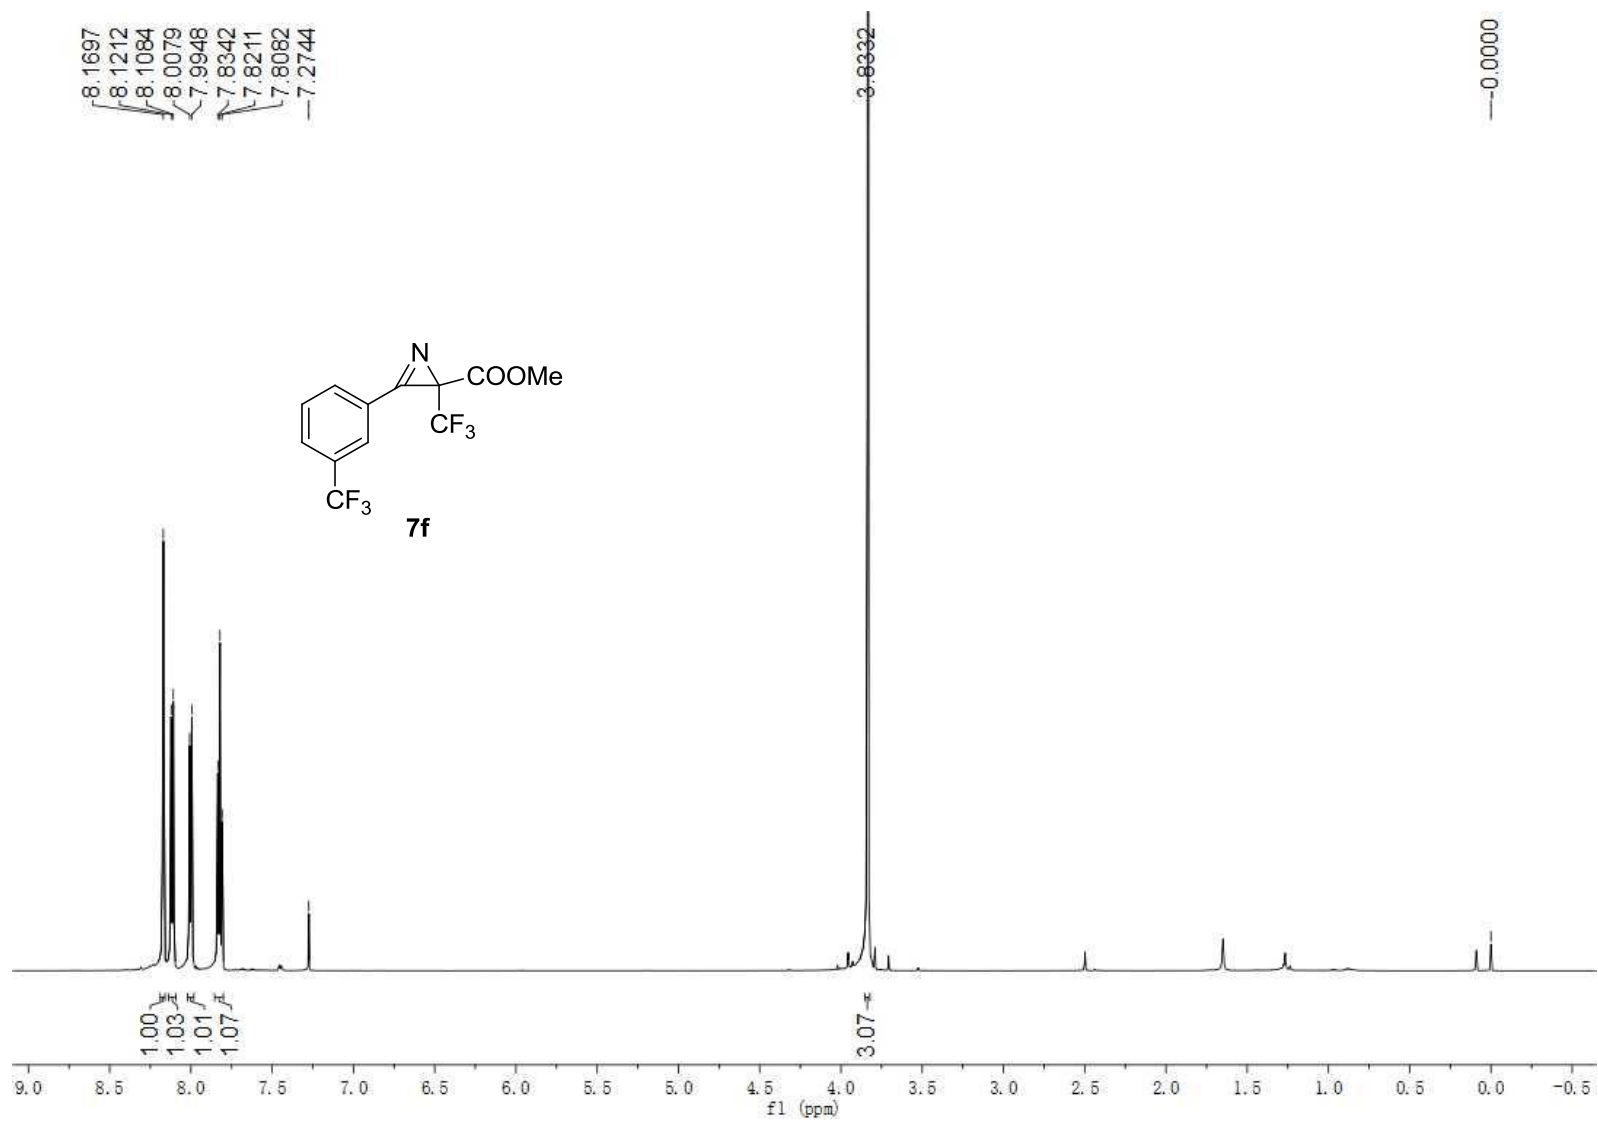

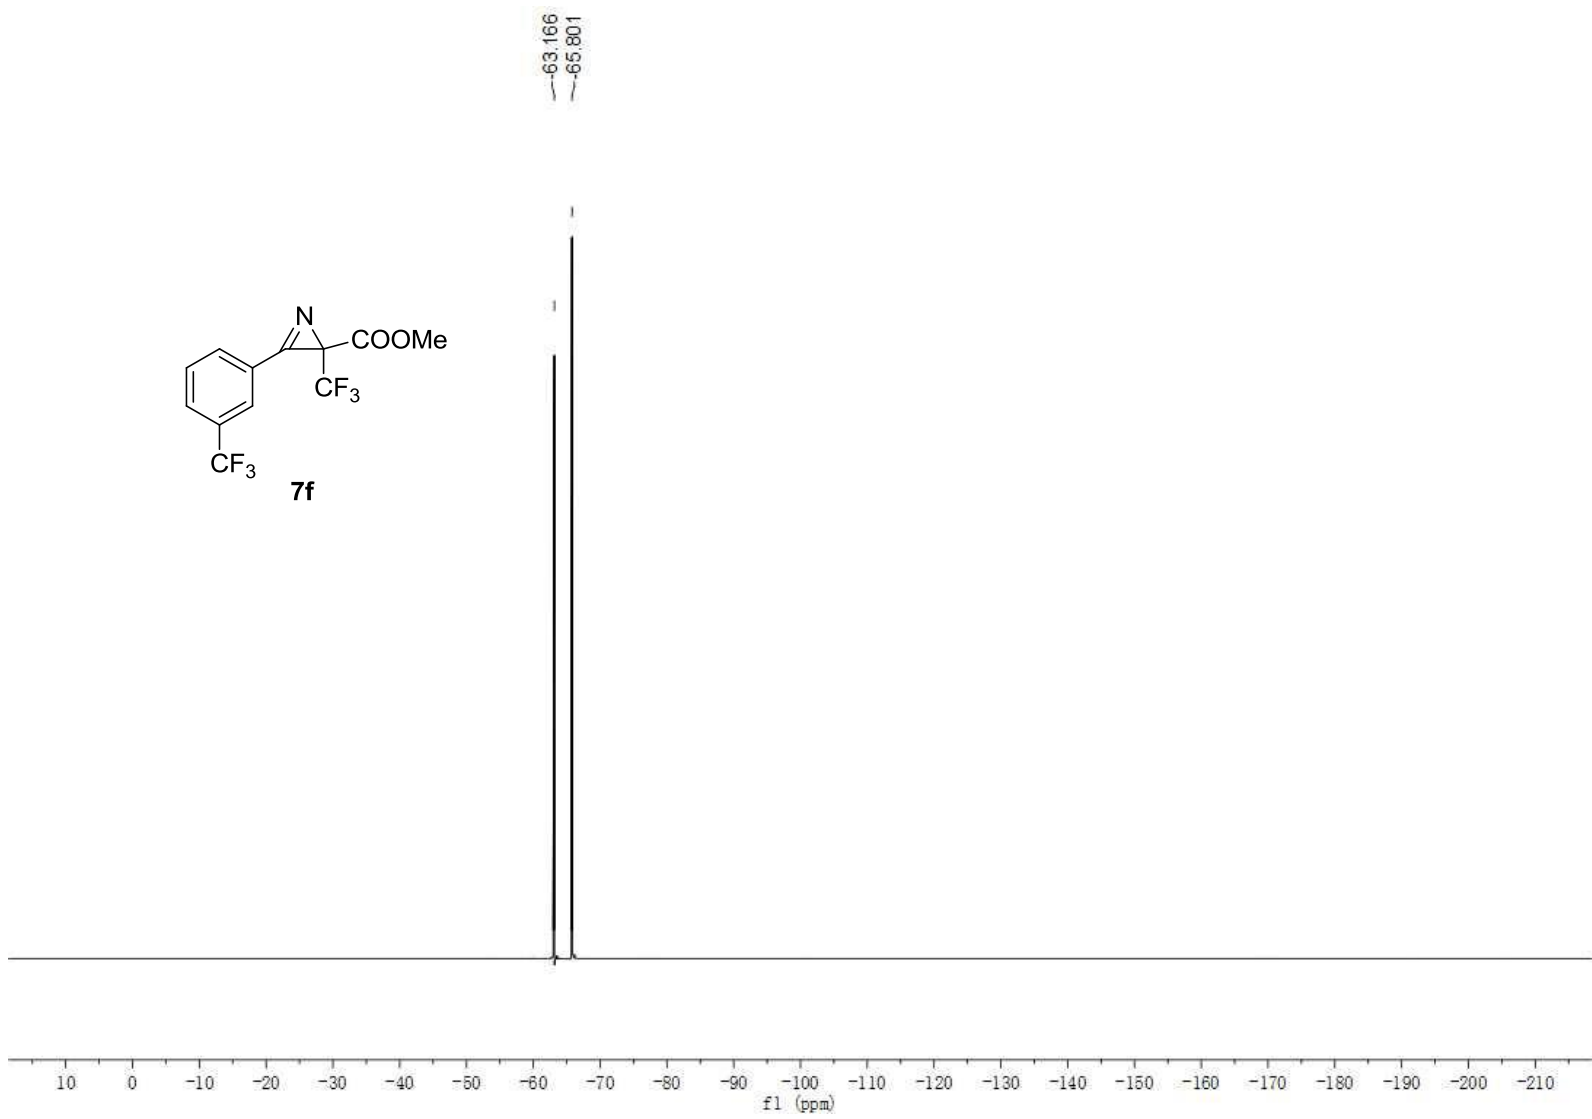

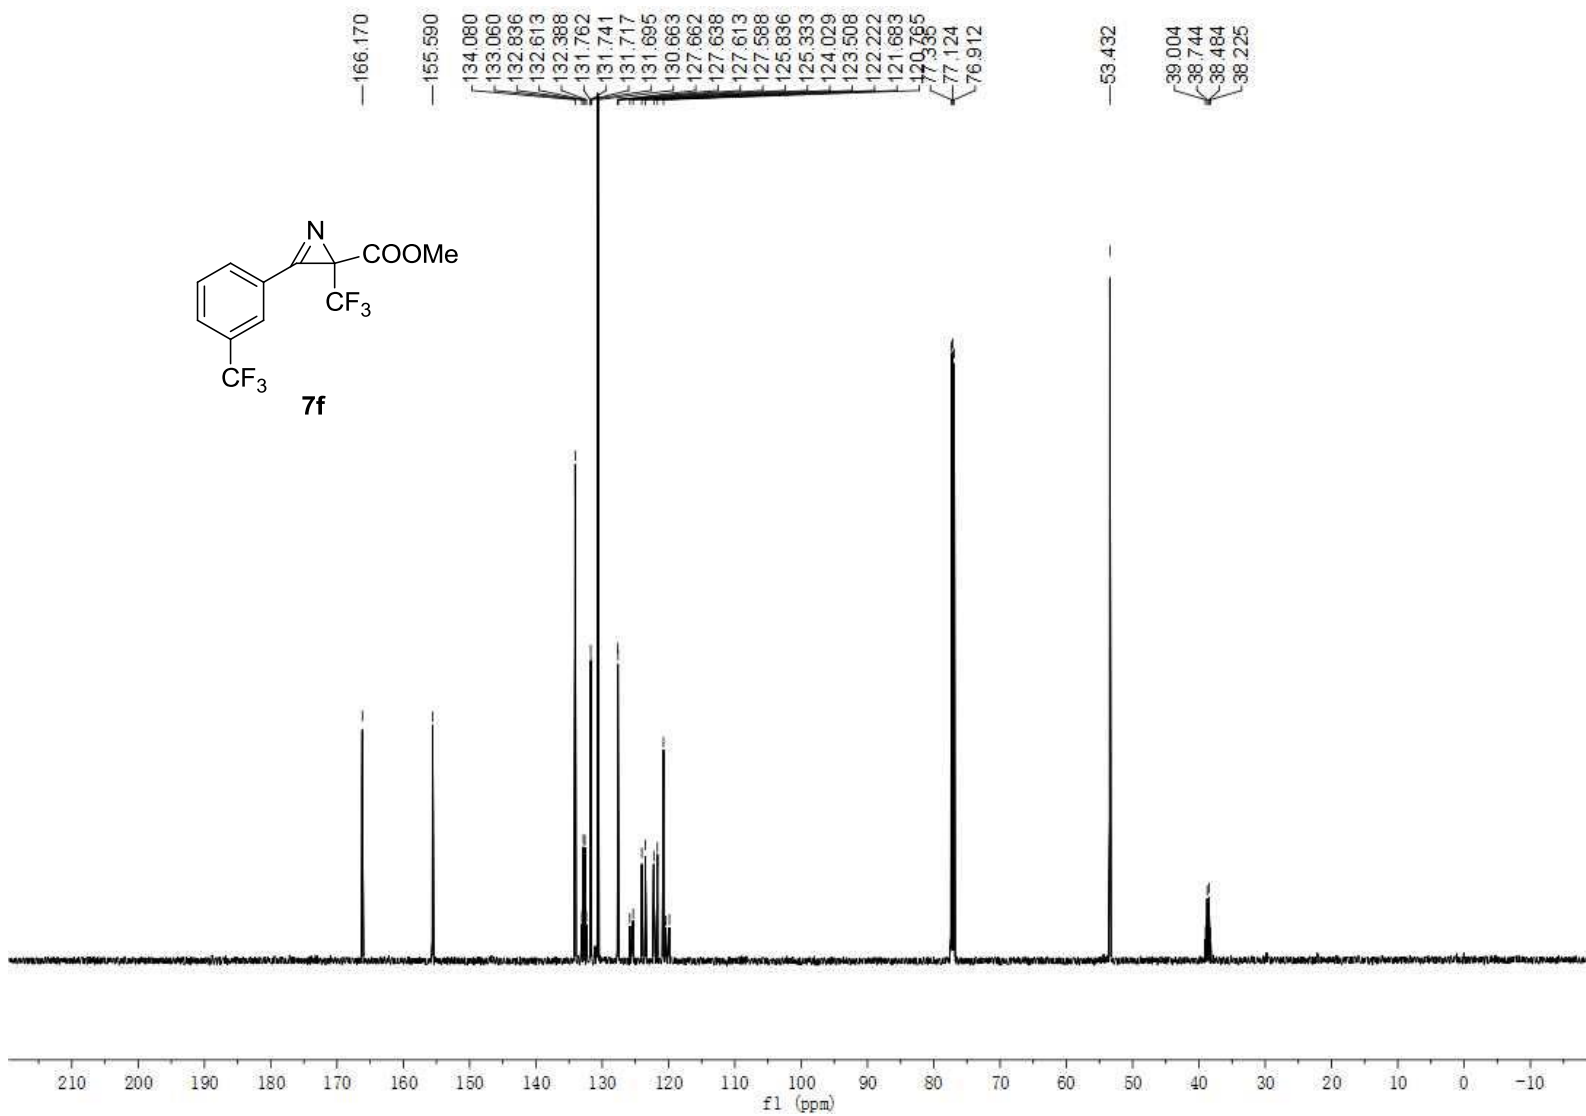

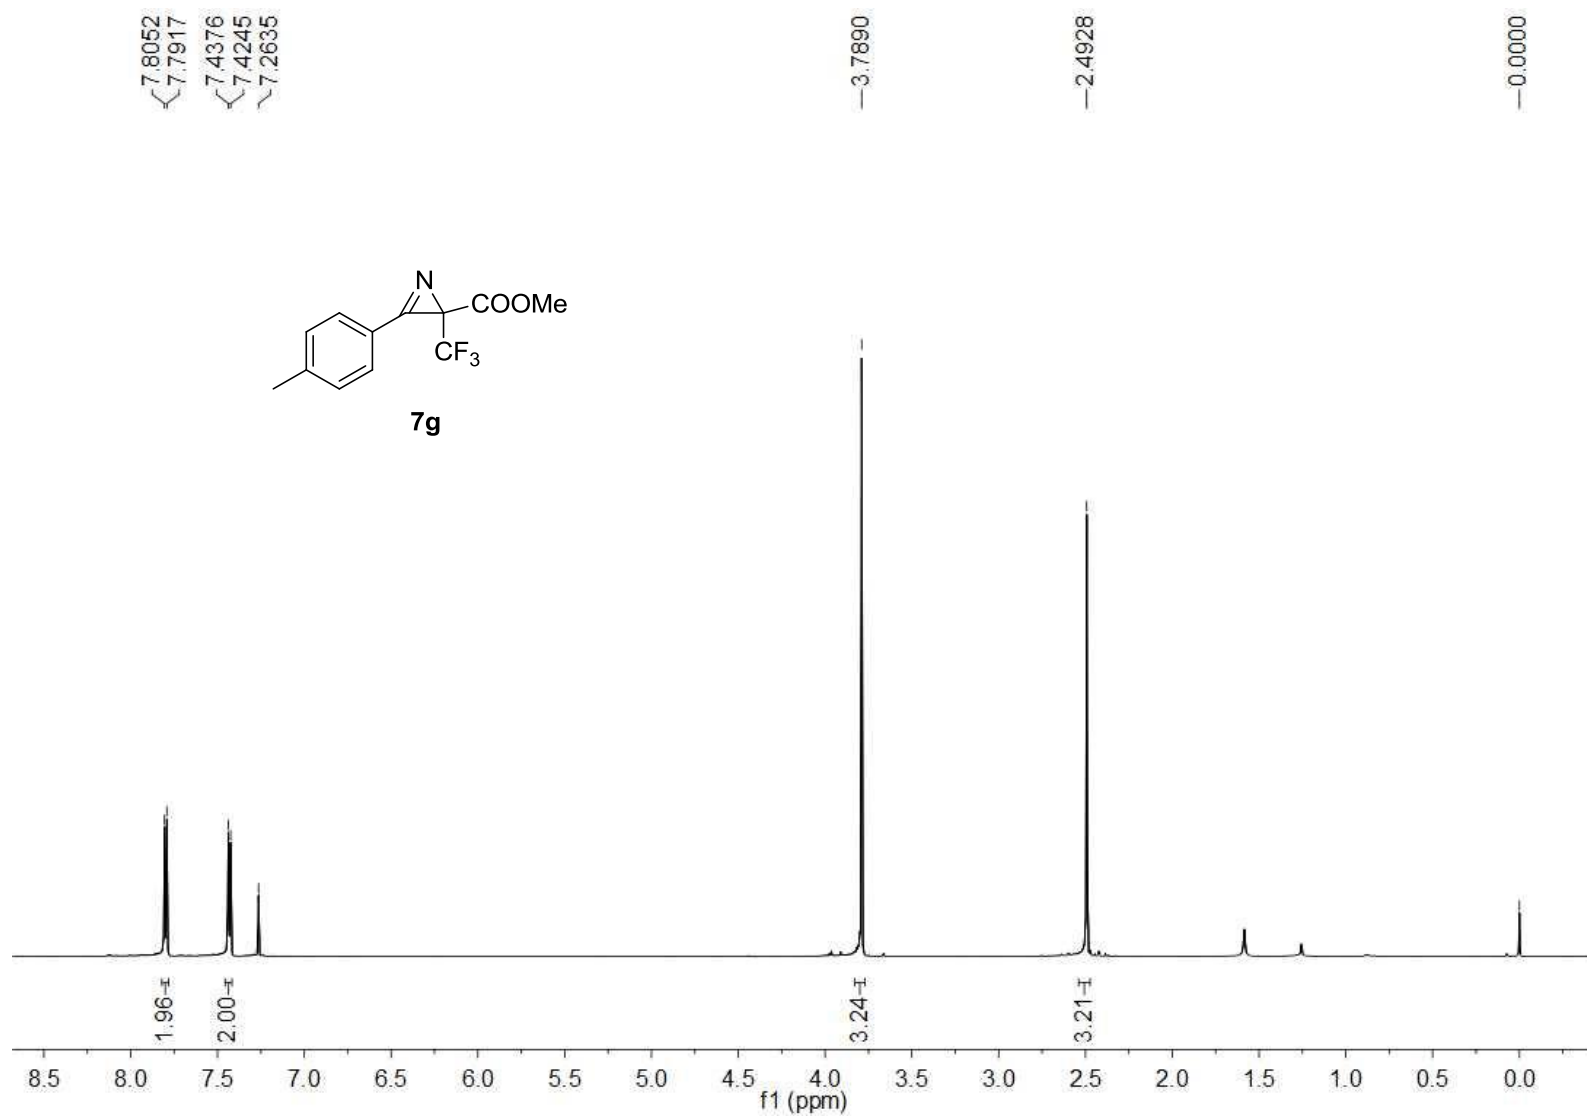



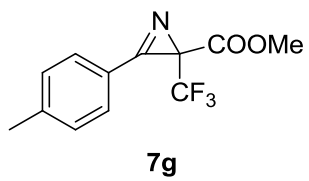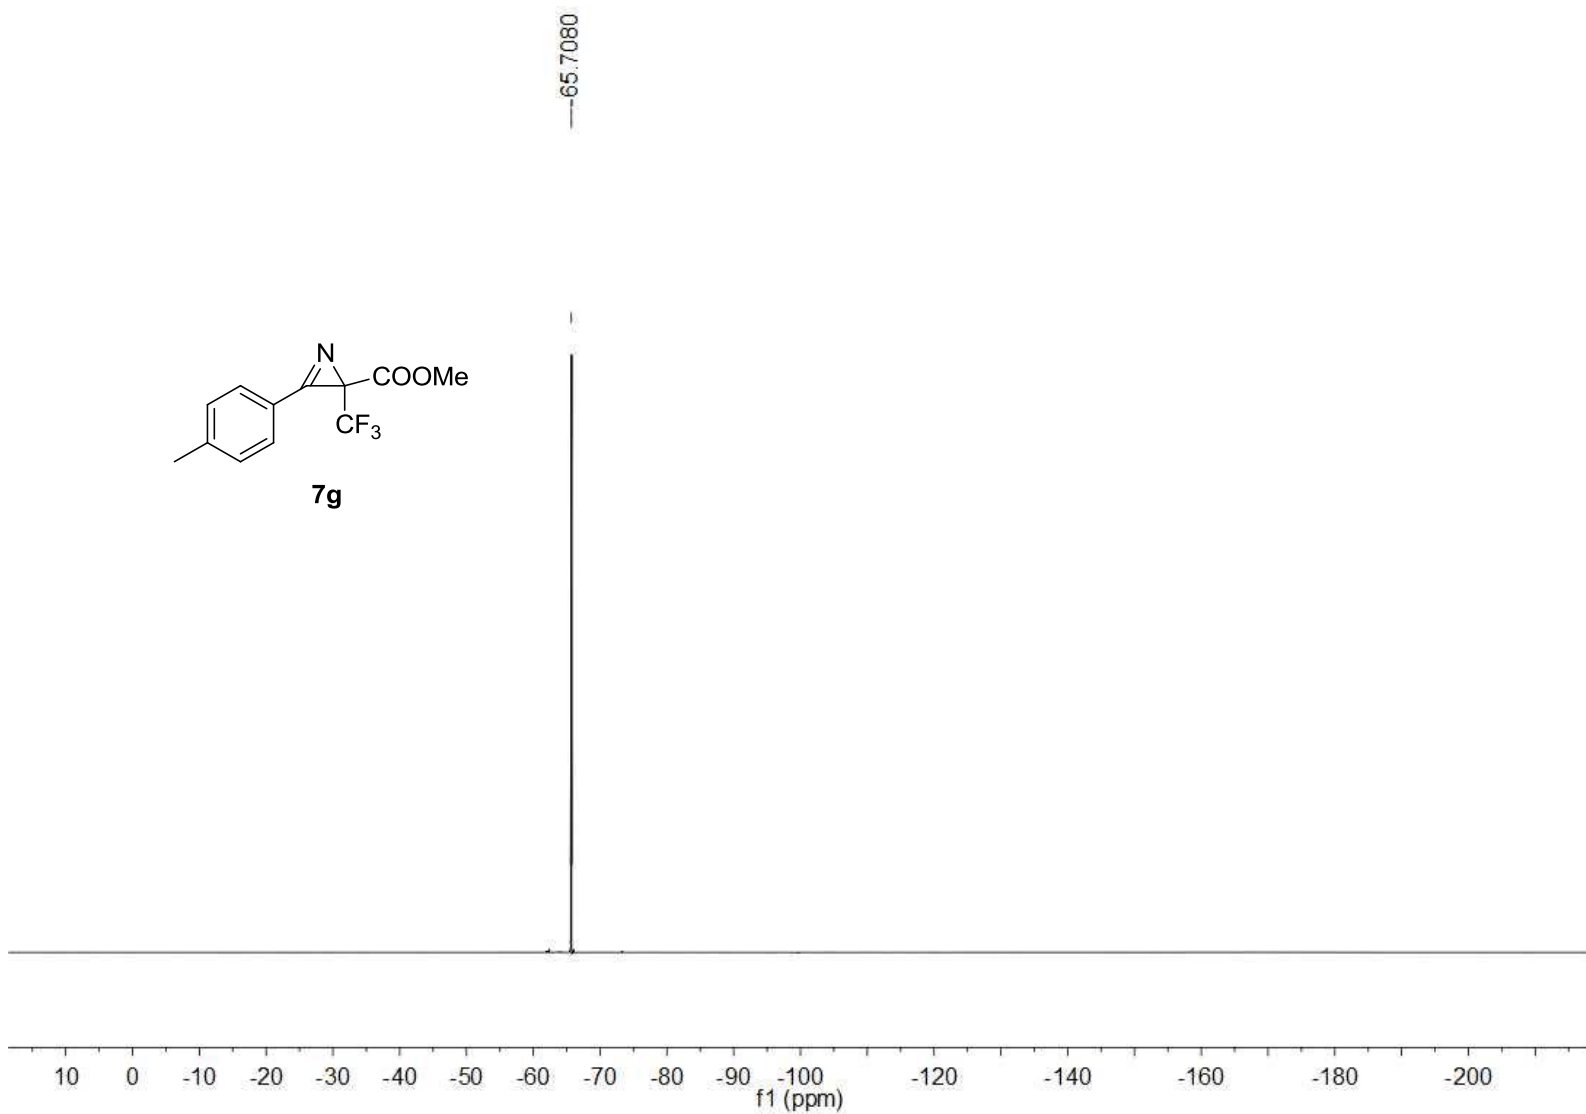

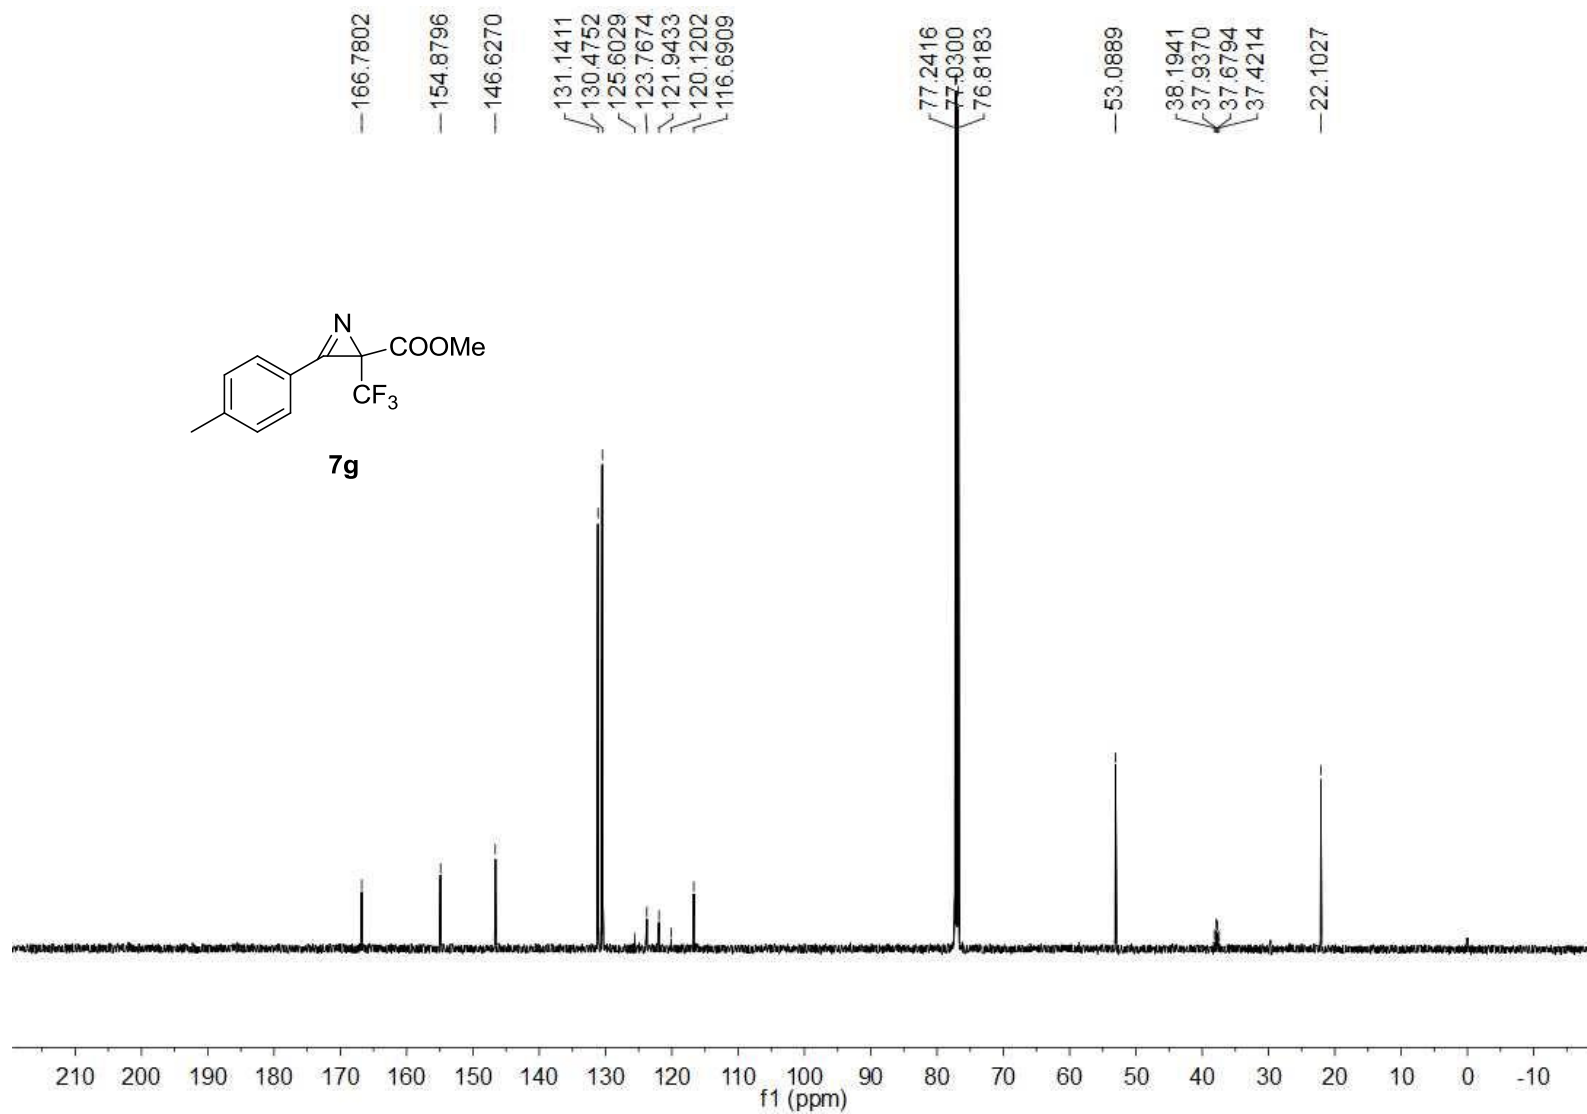

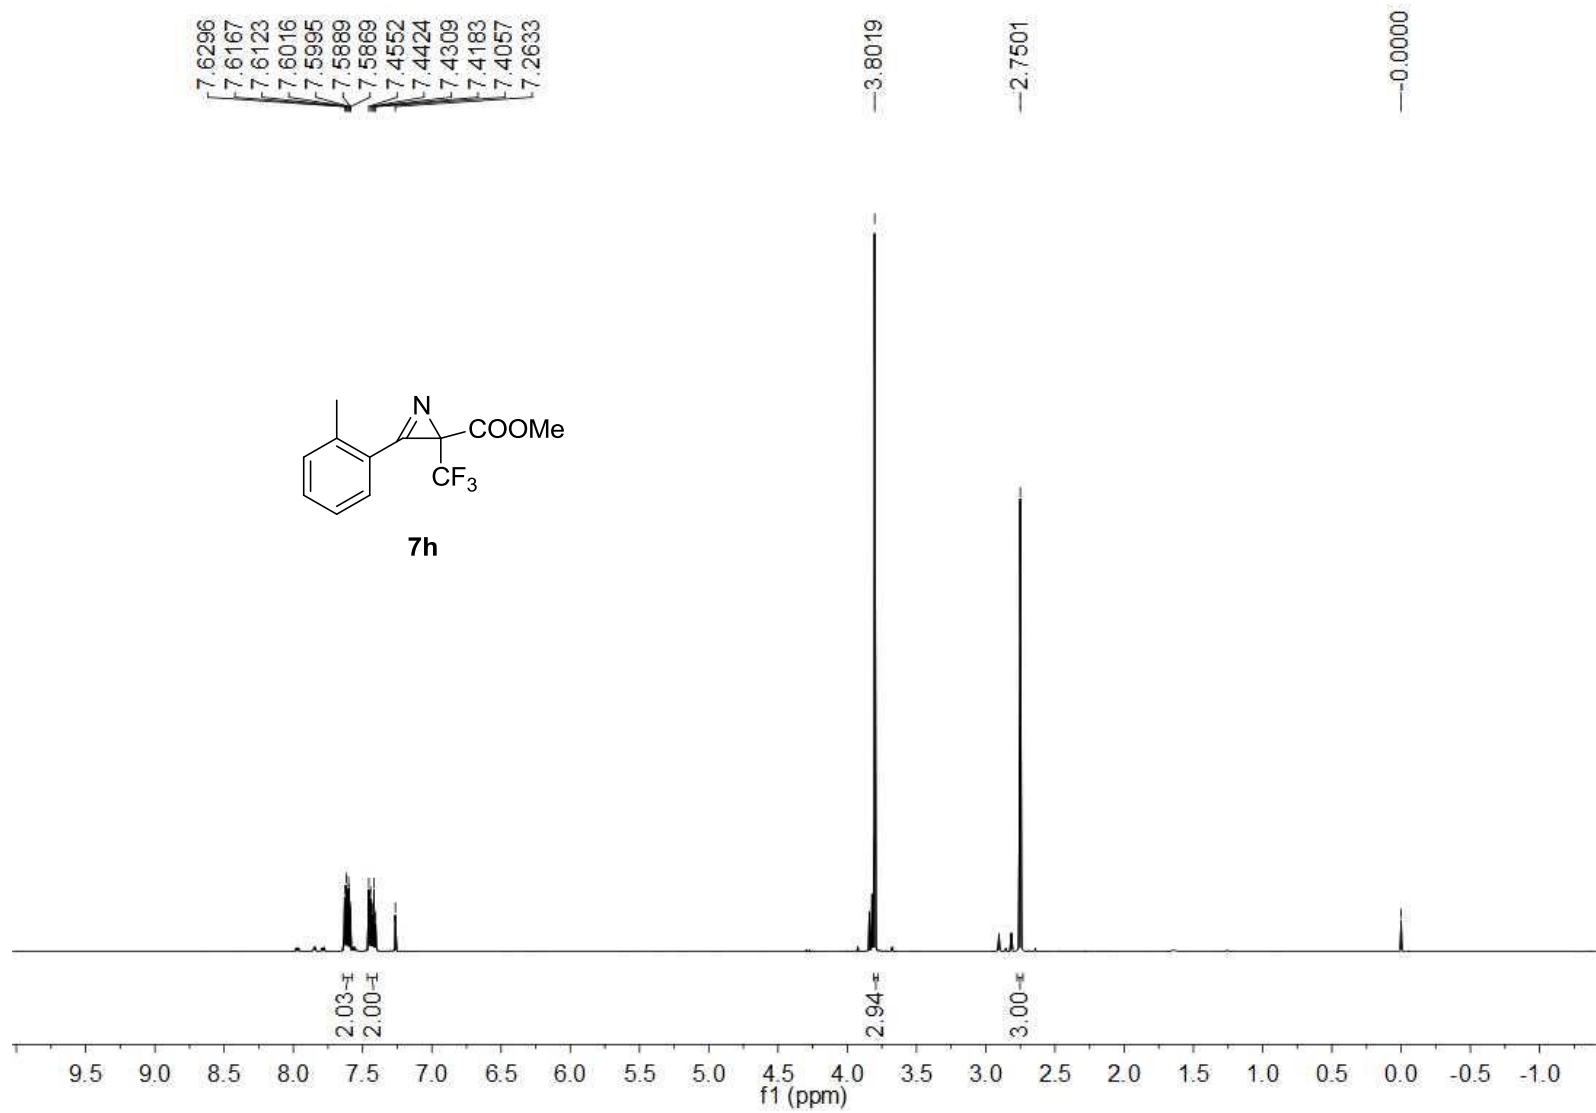

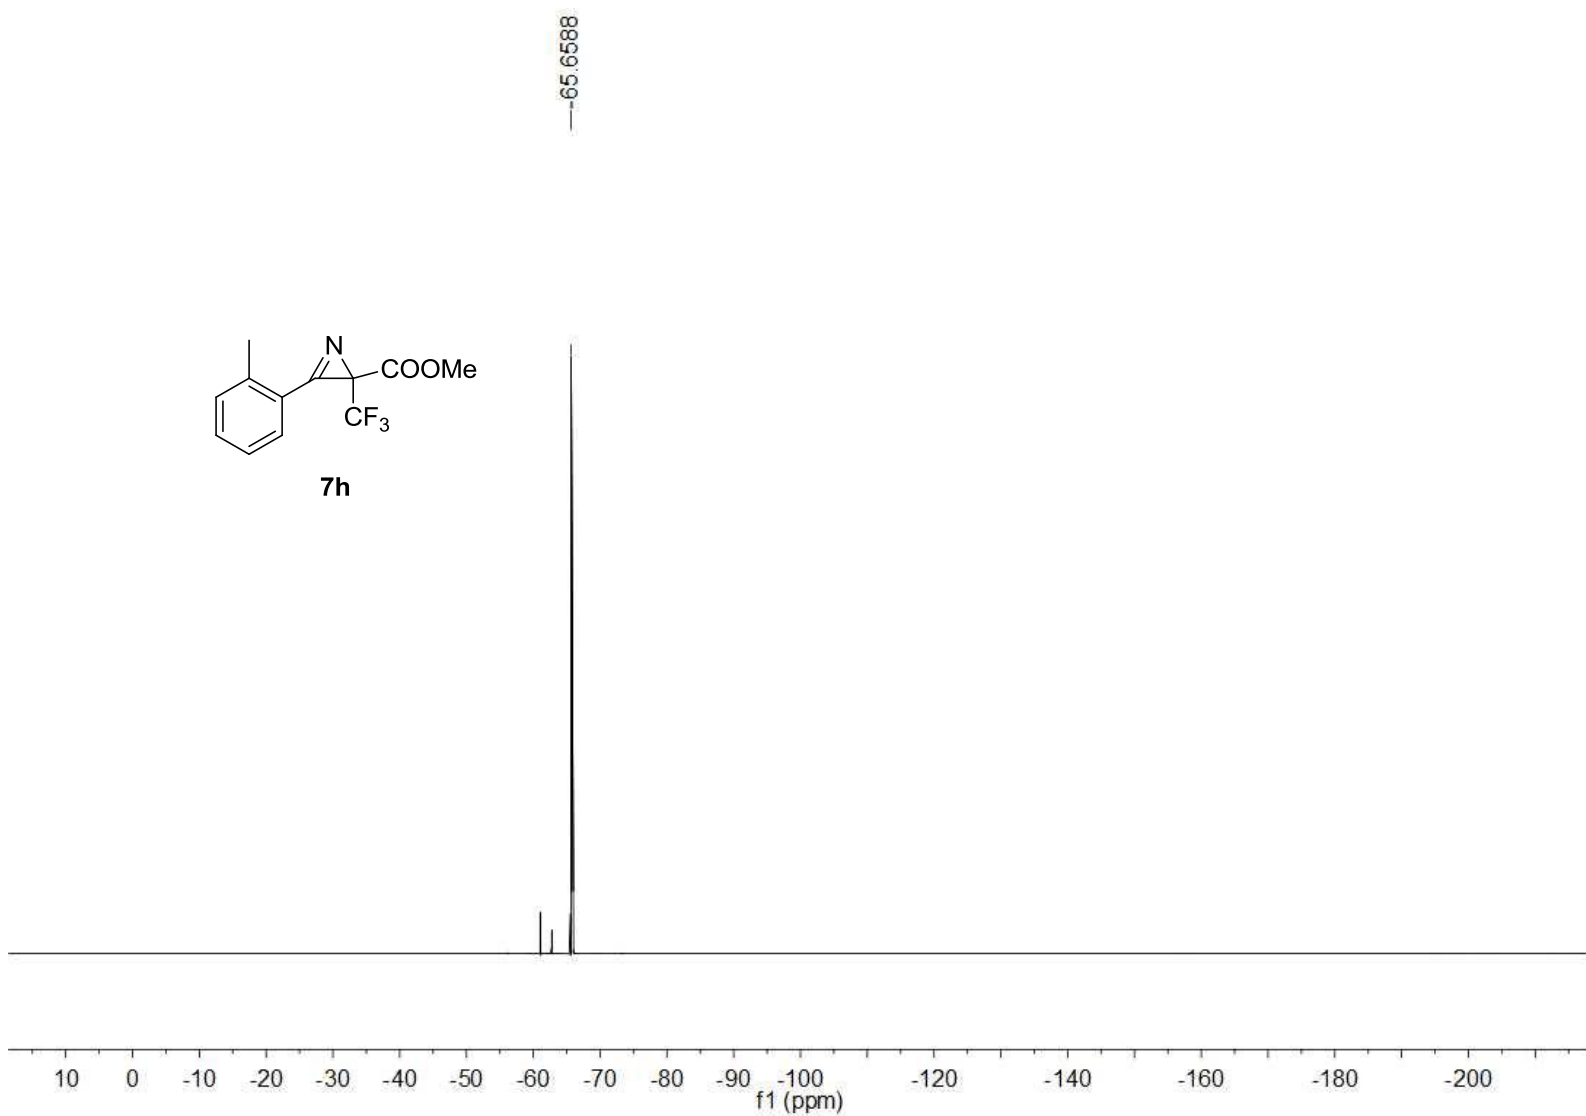

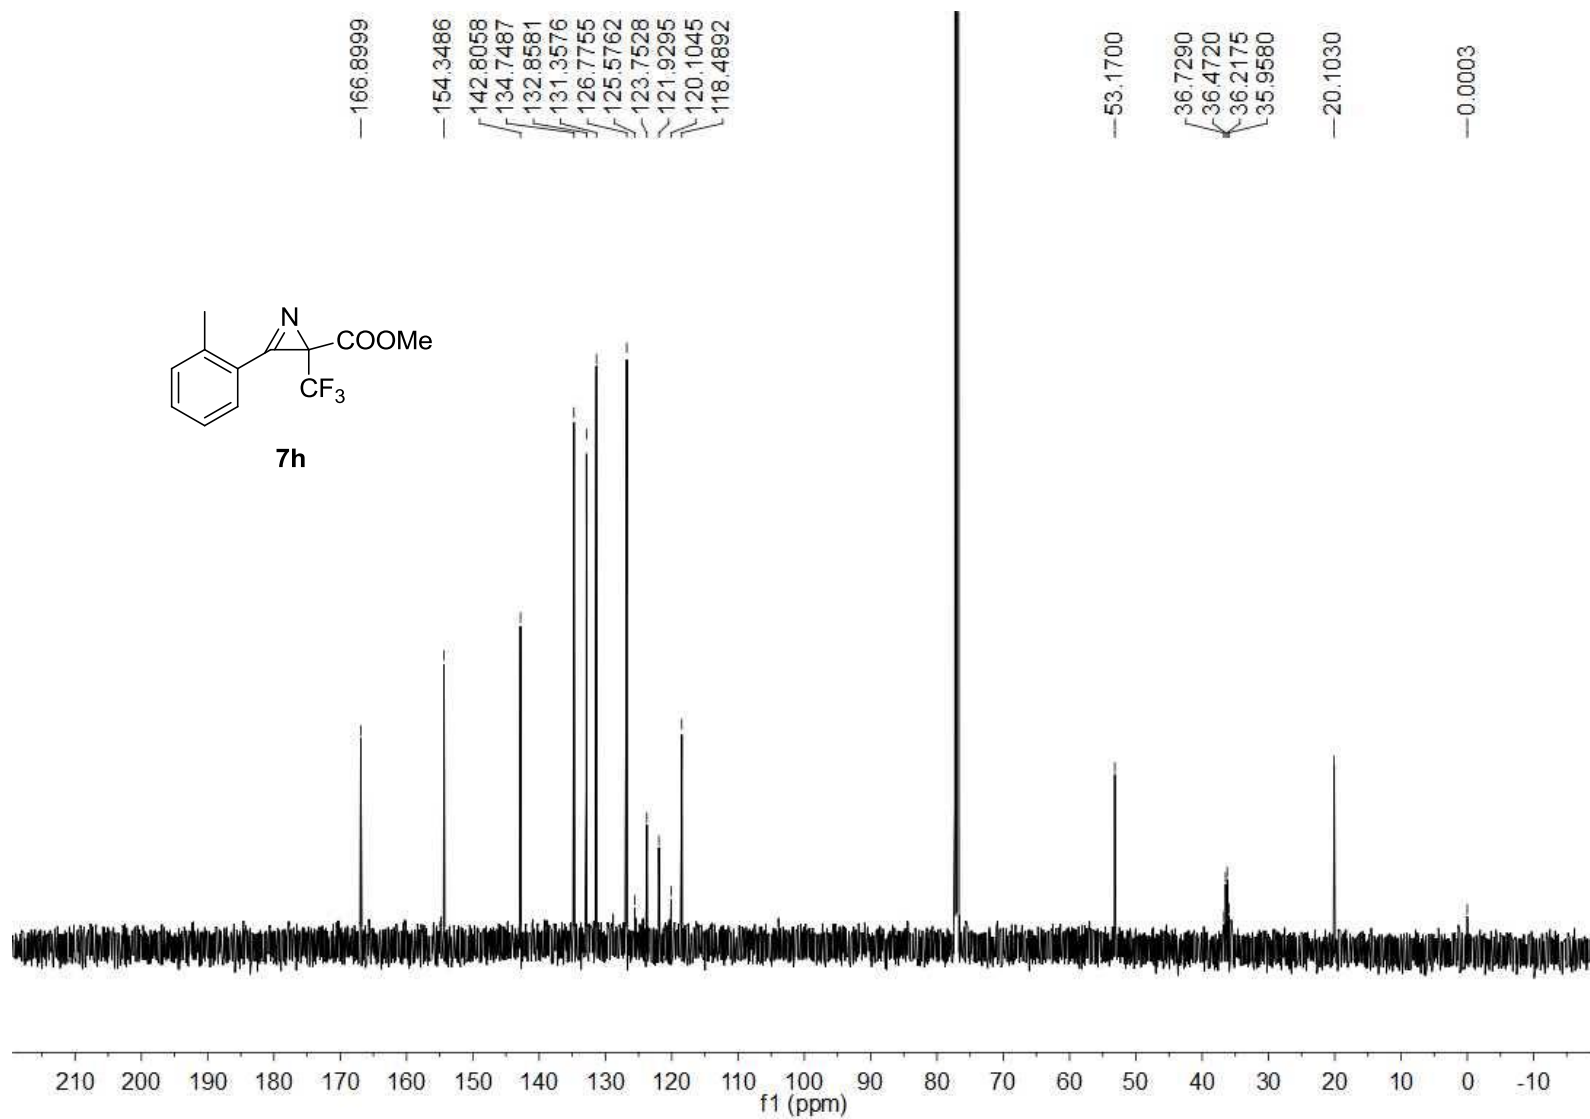

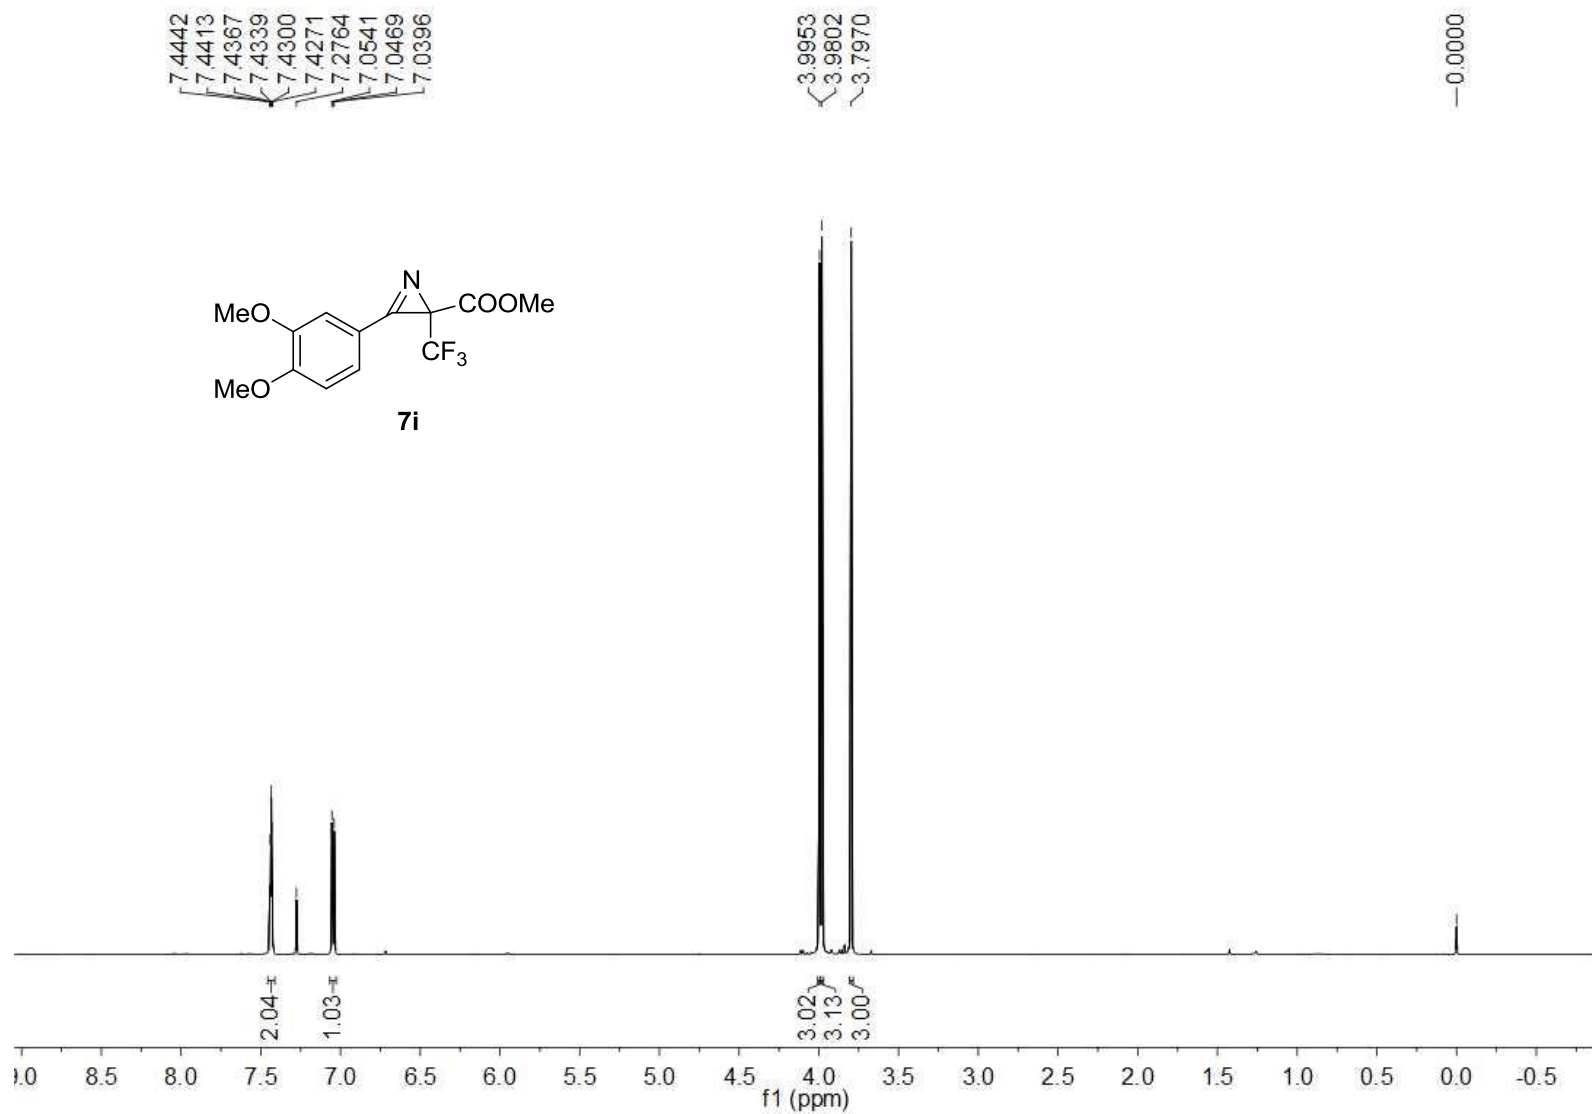

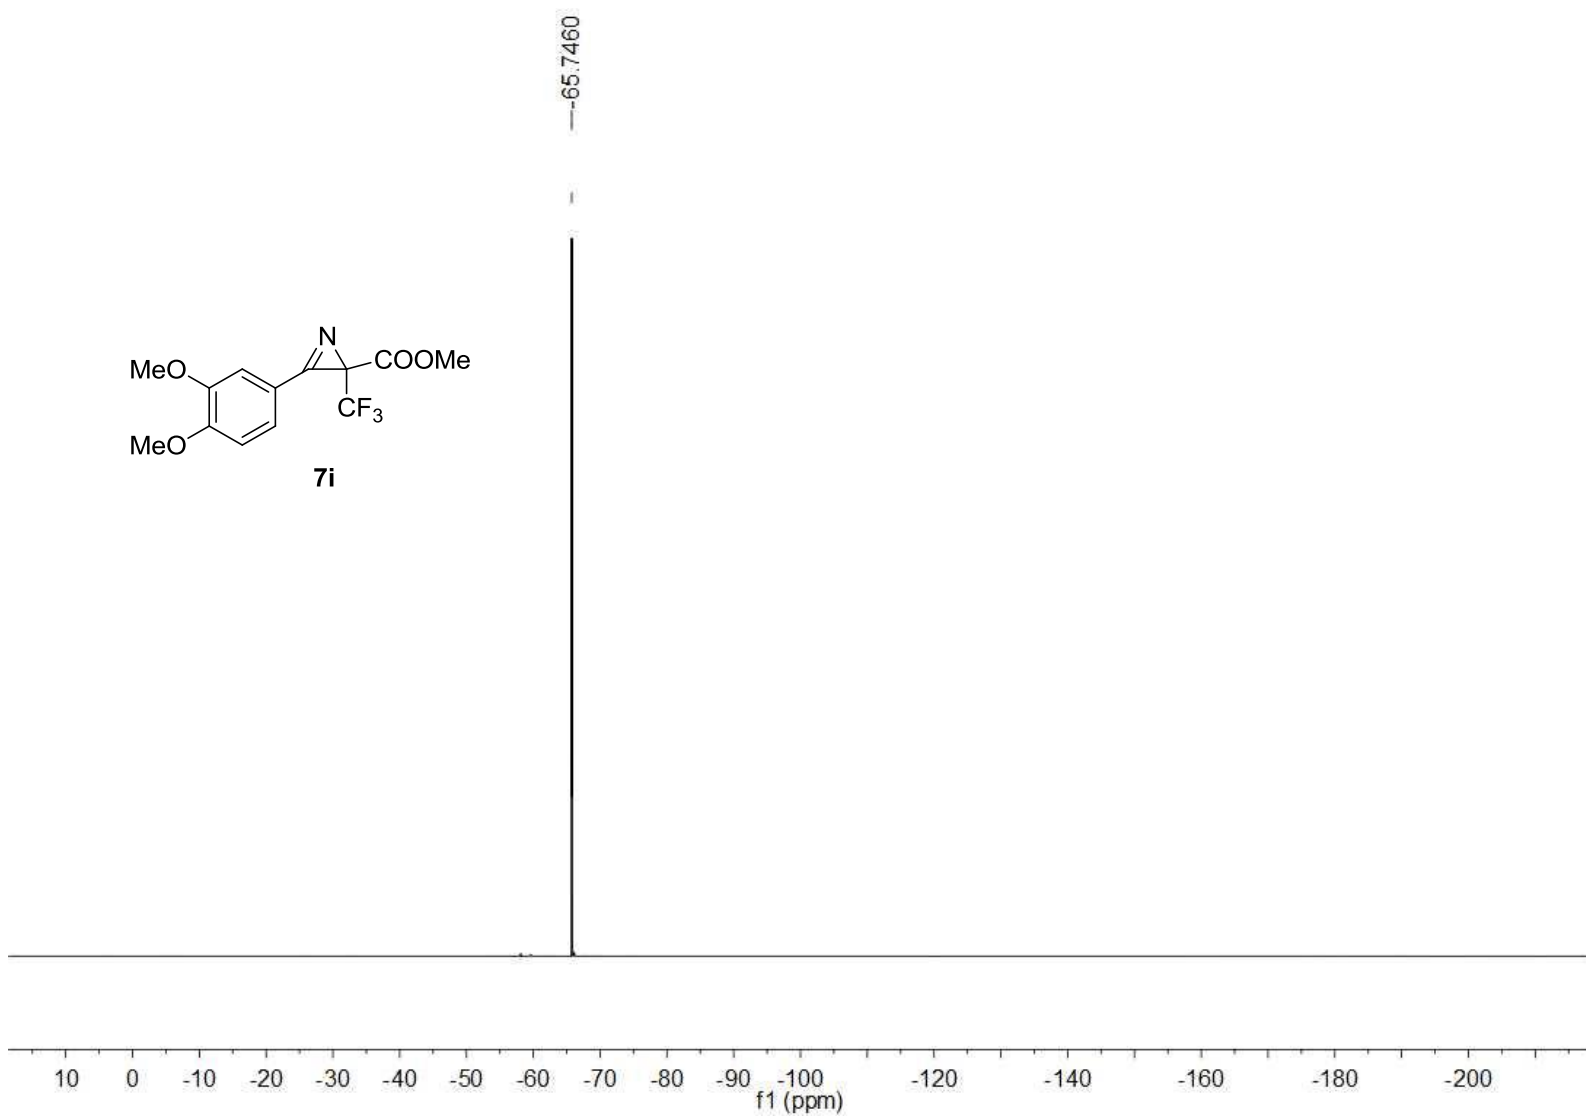

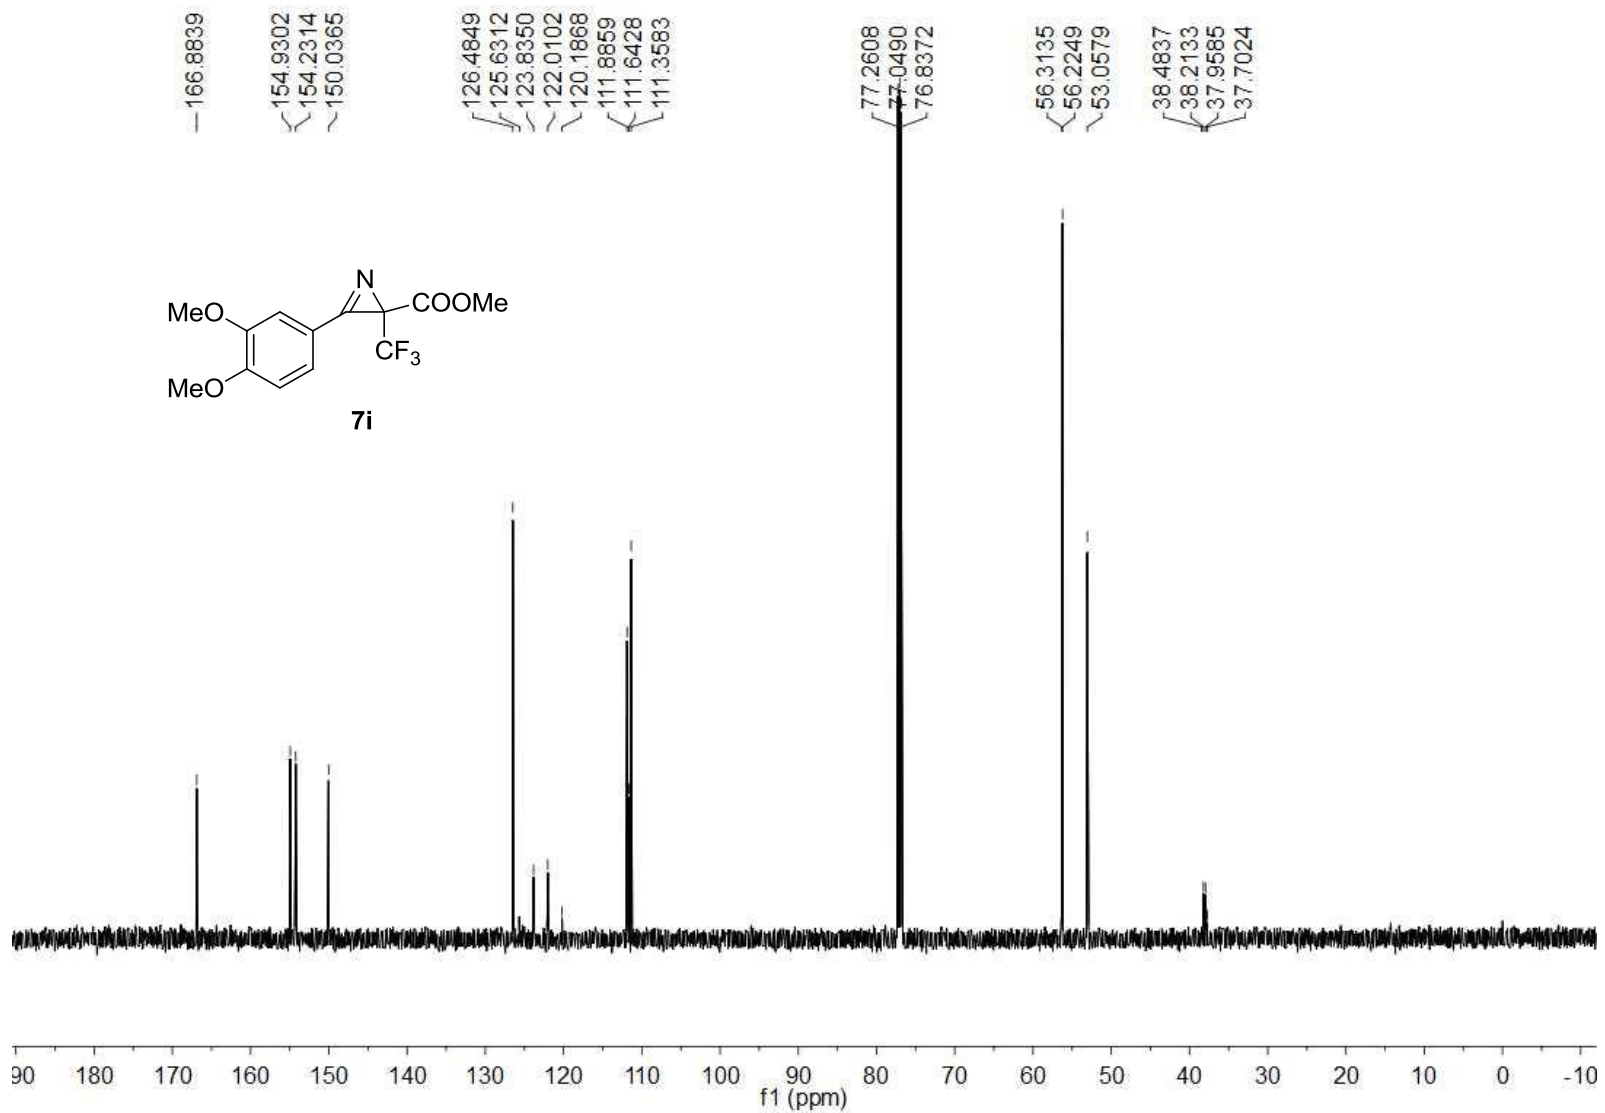



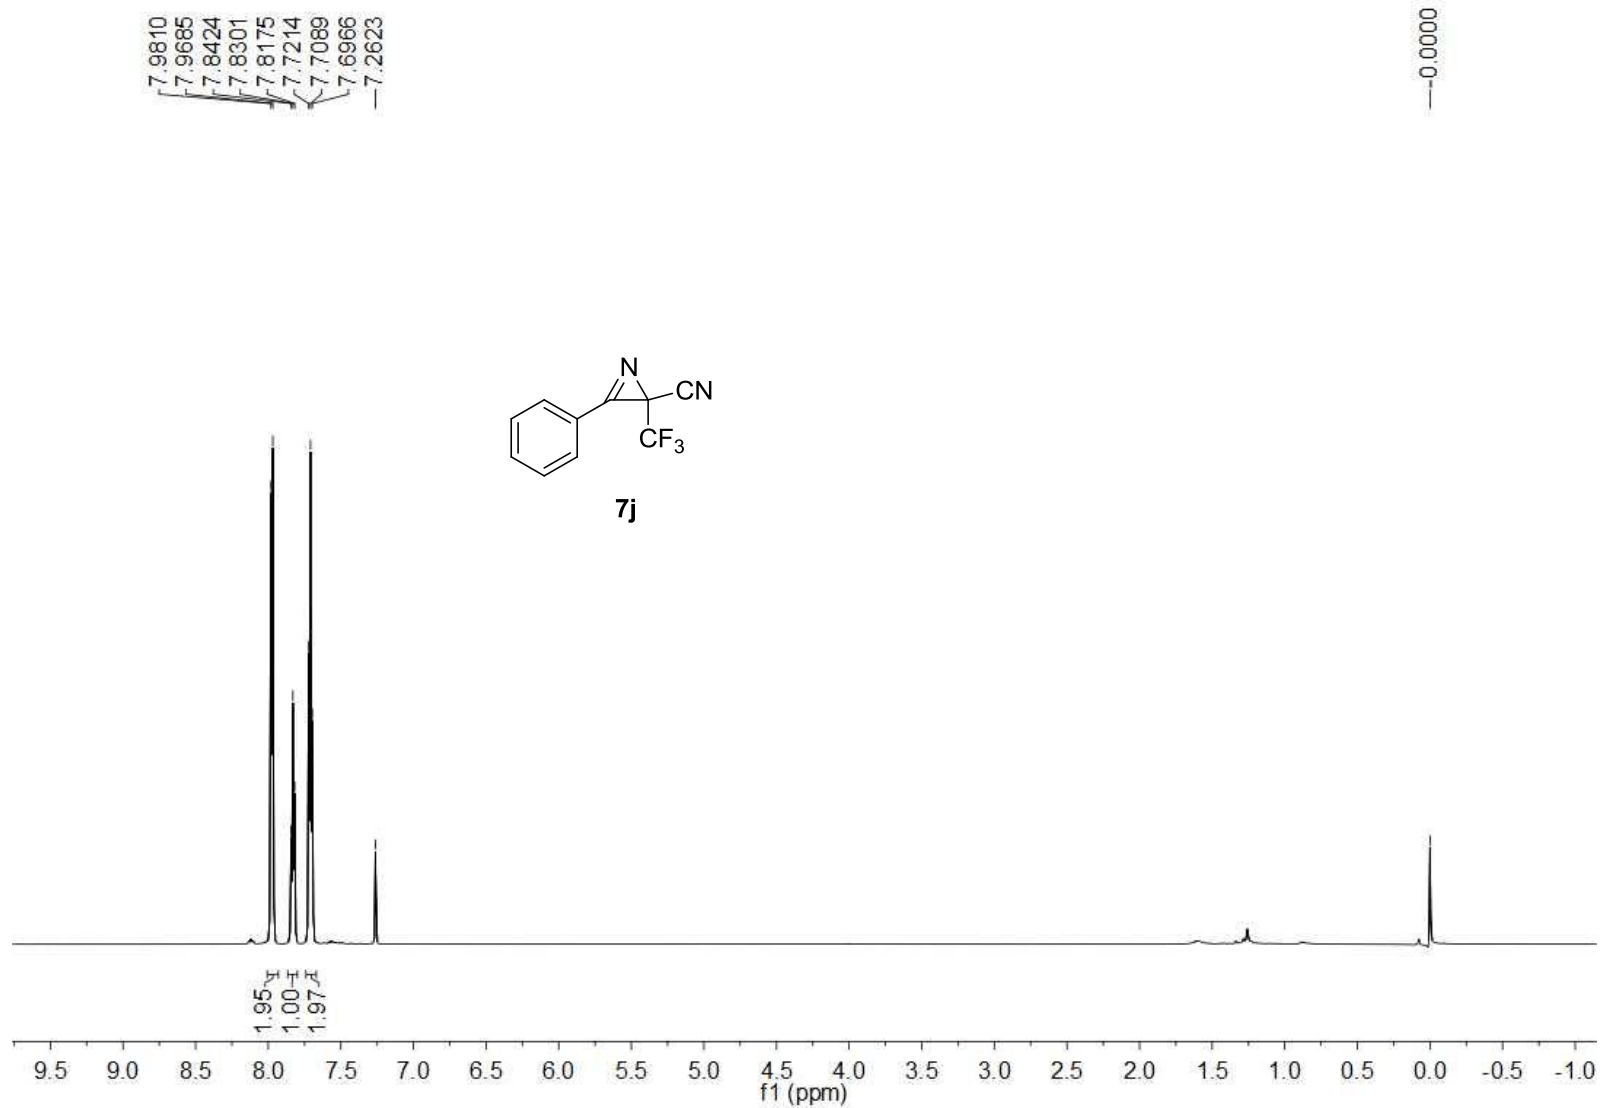

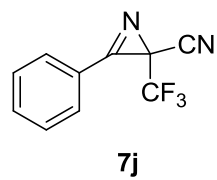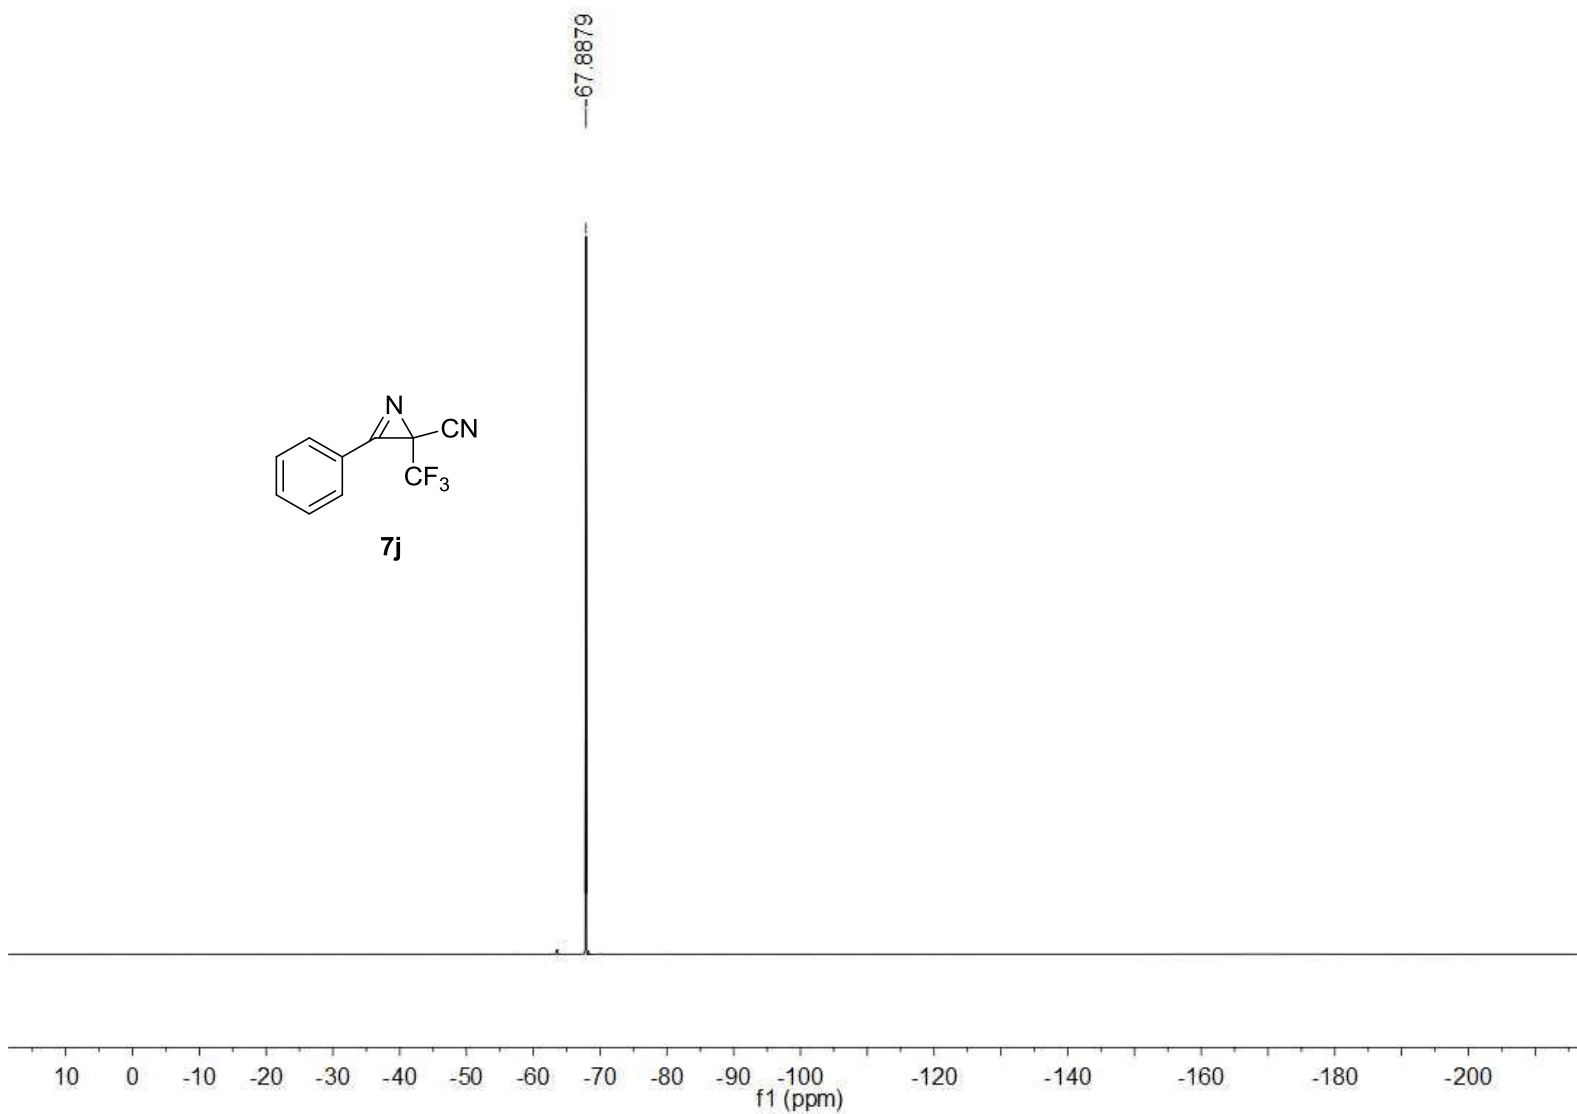

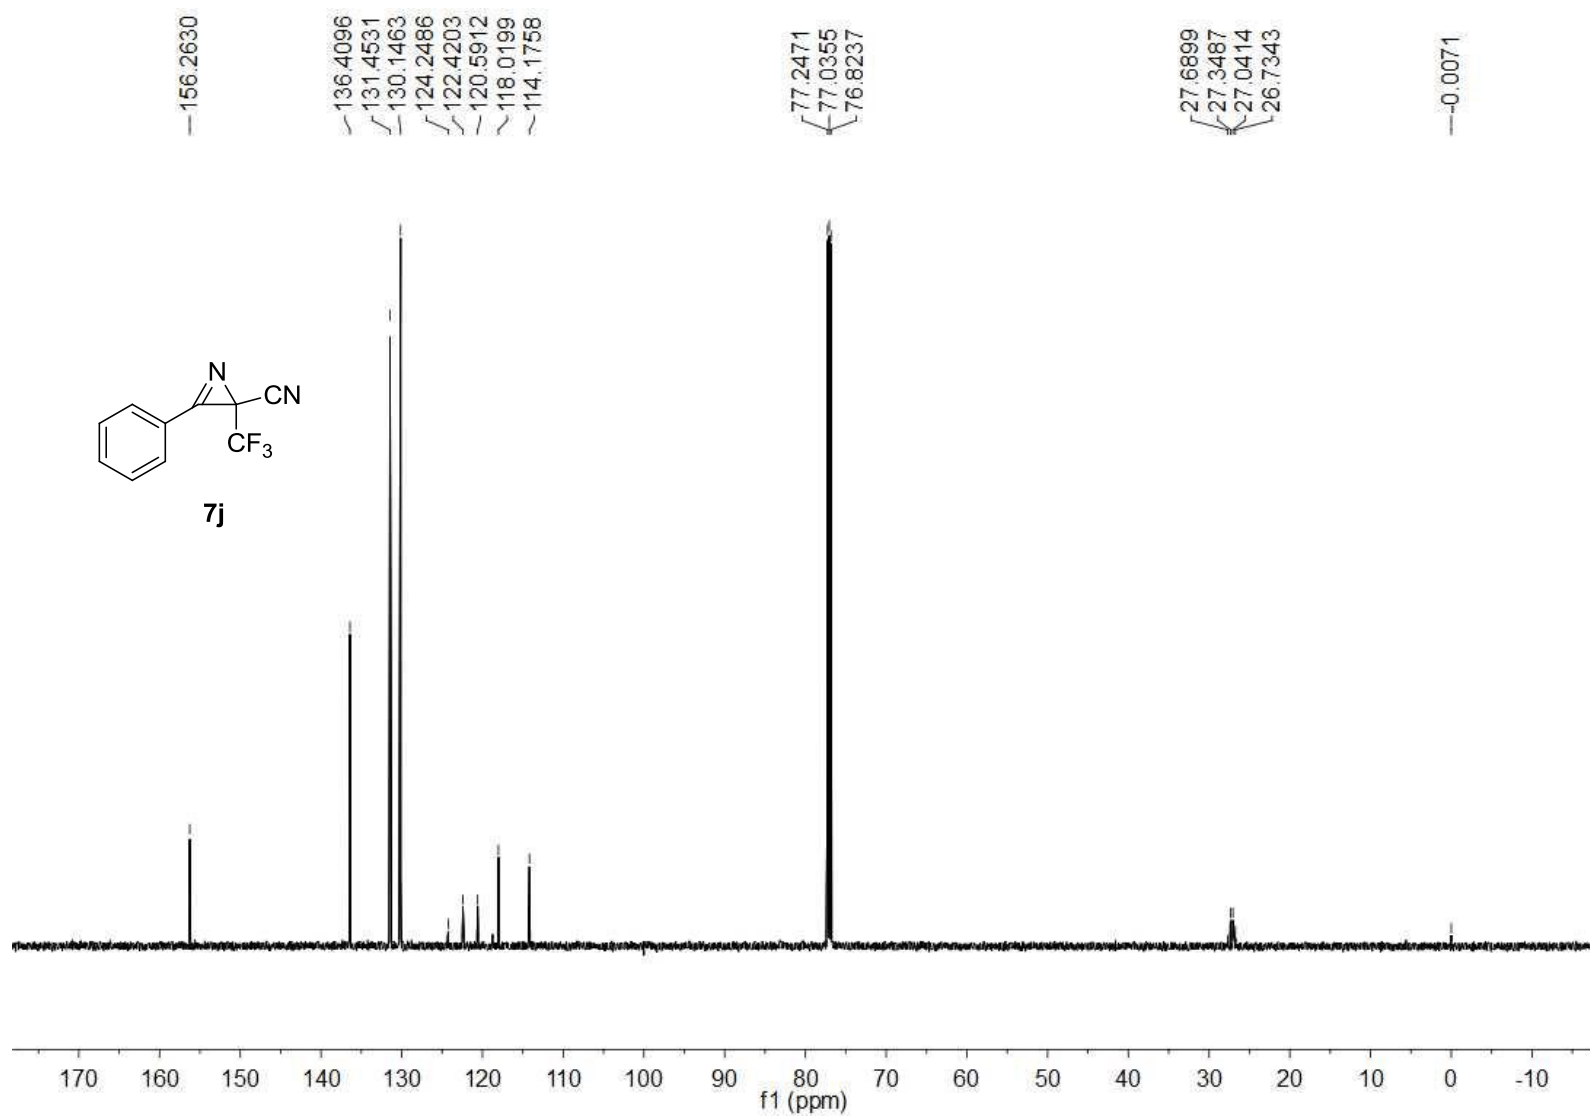

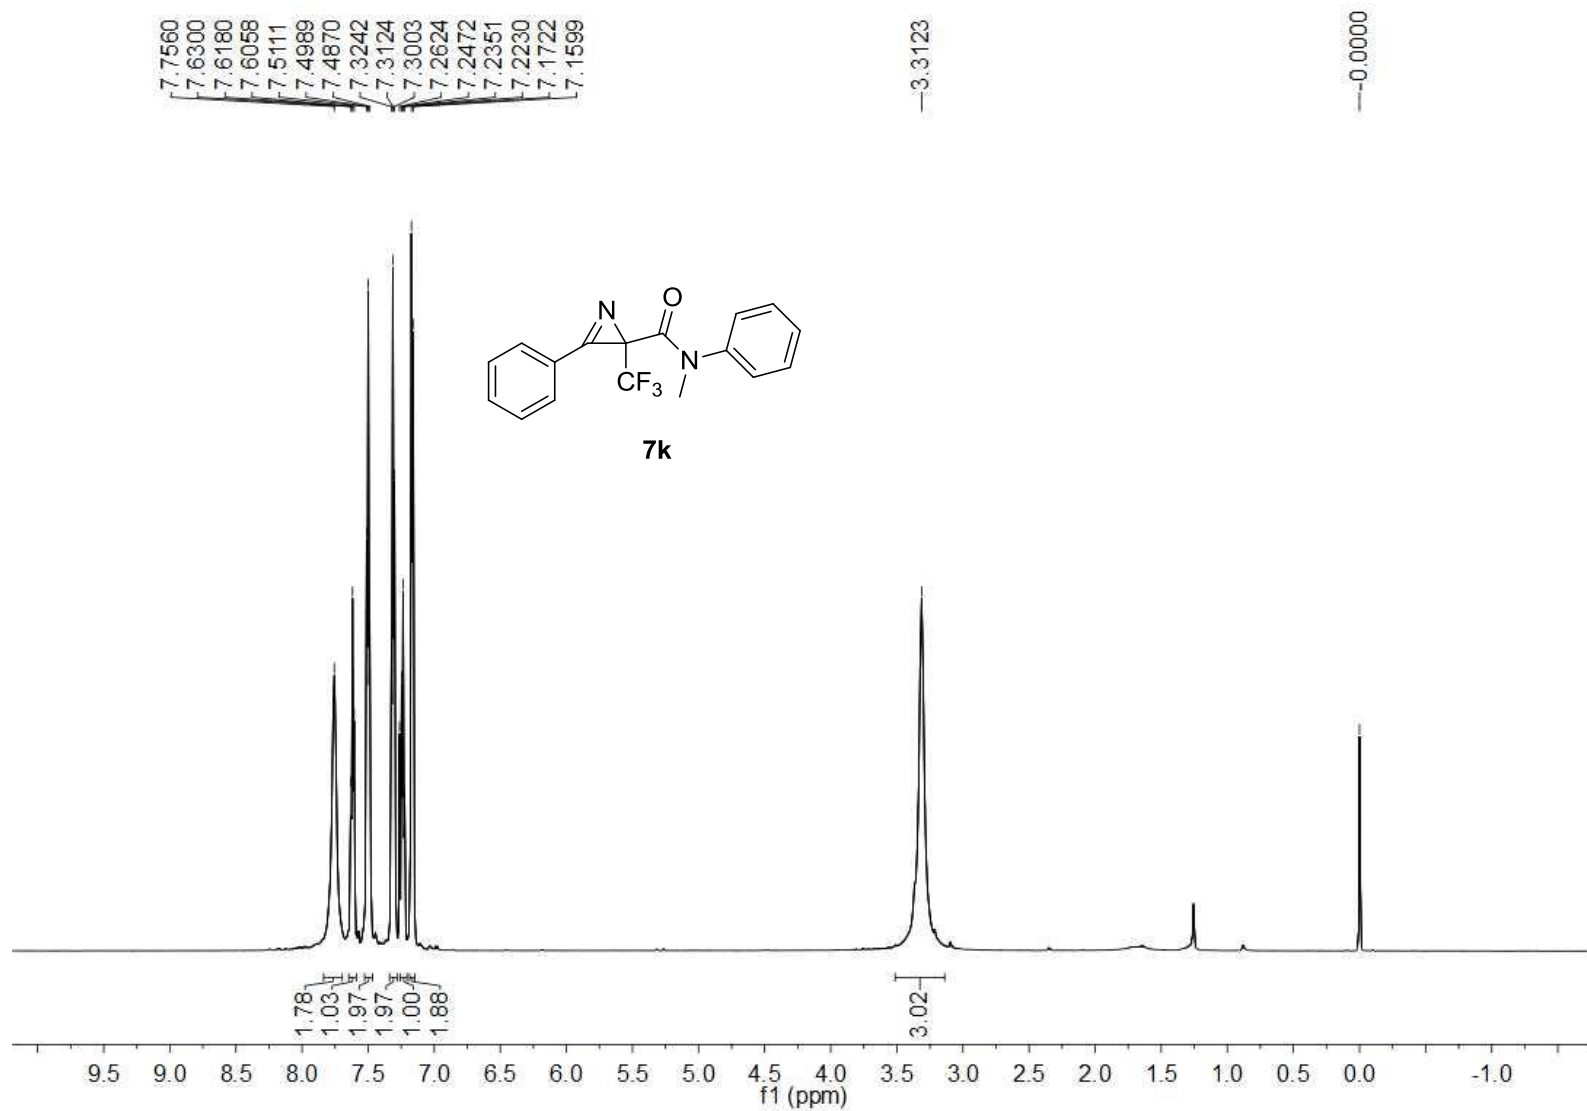

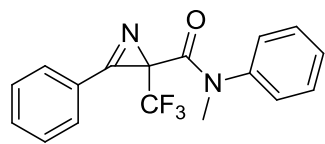

7k

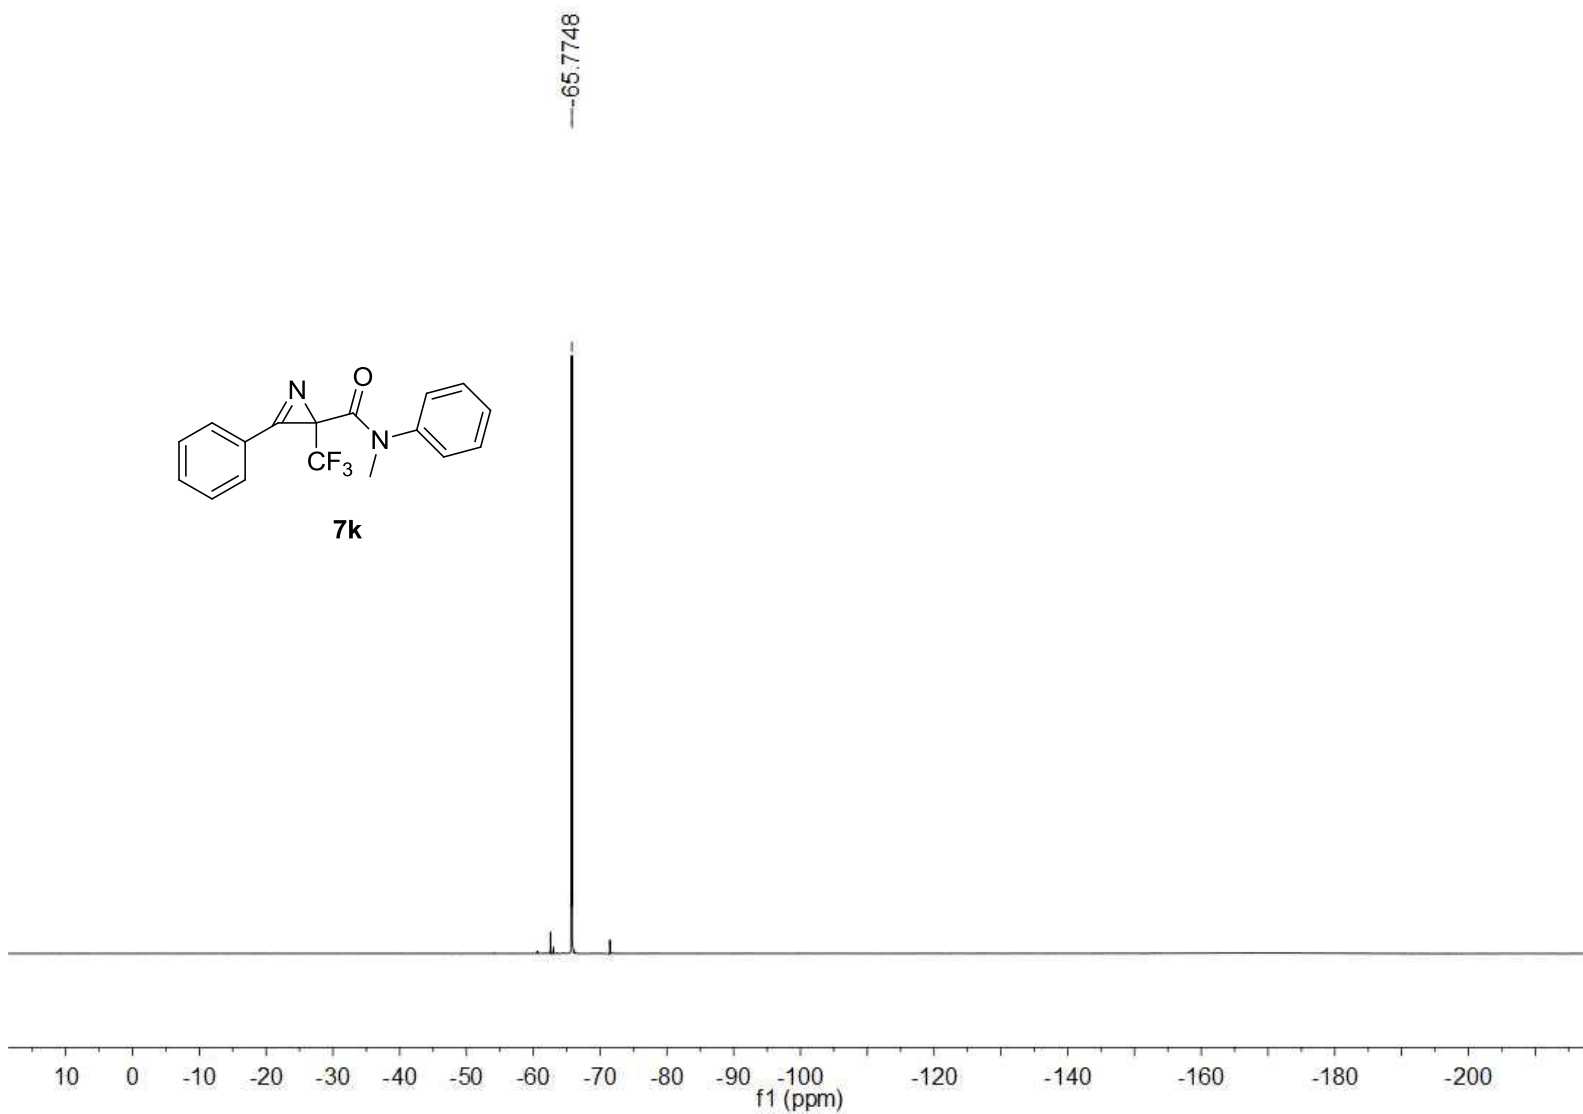

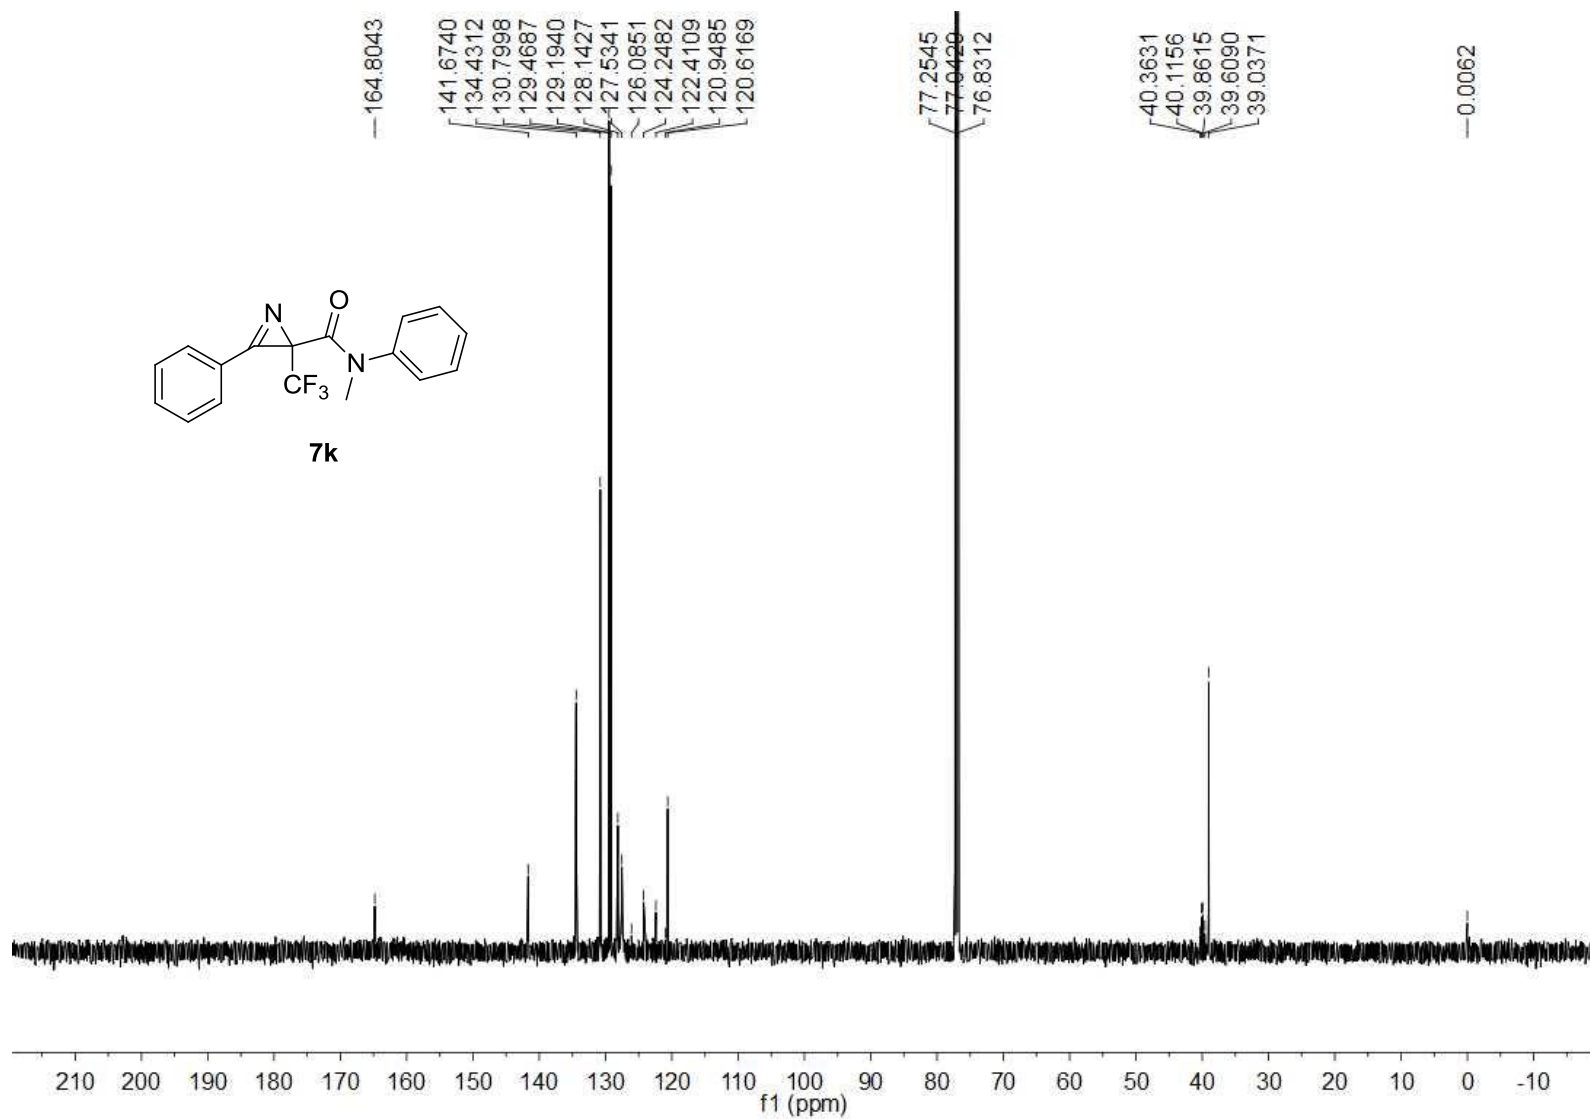

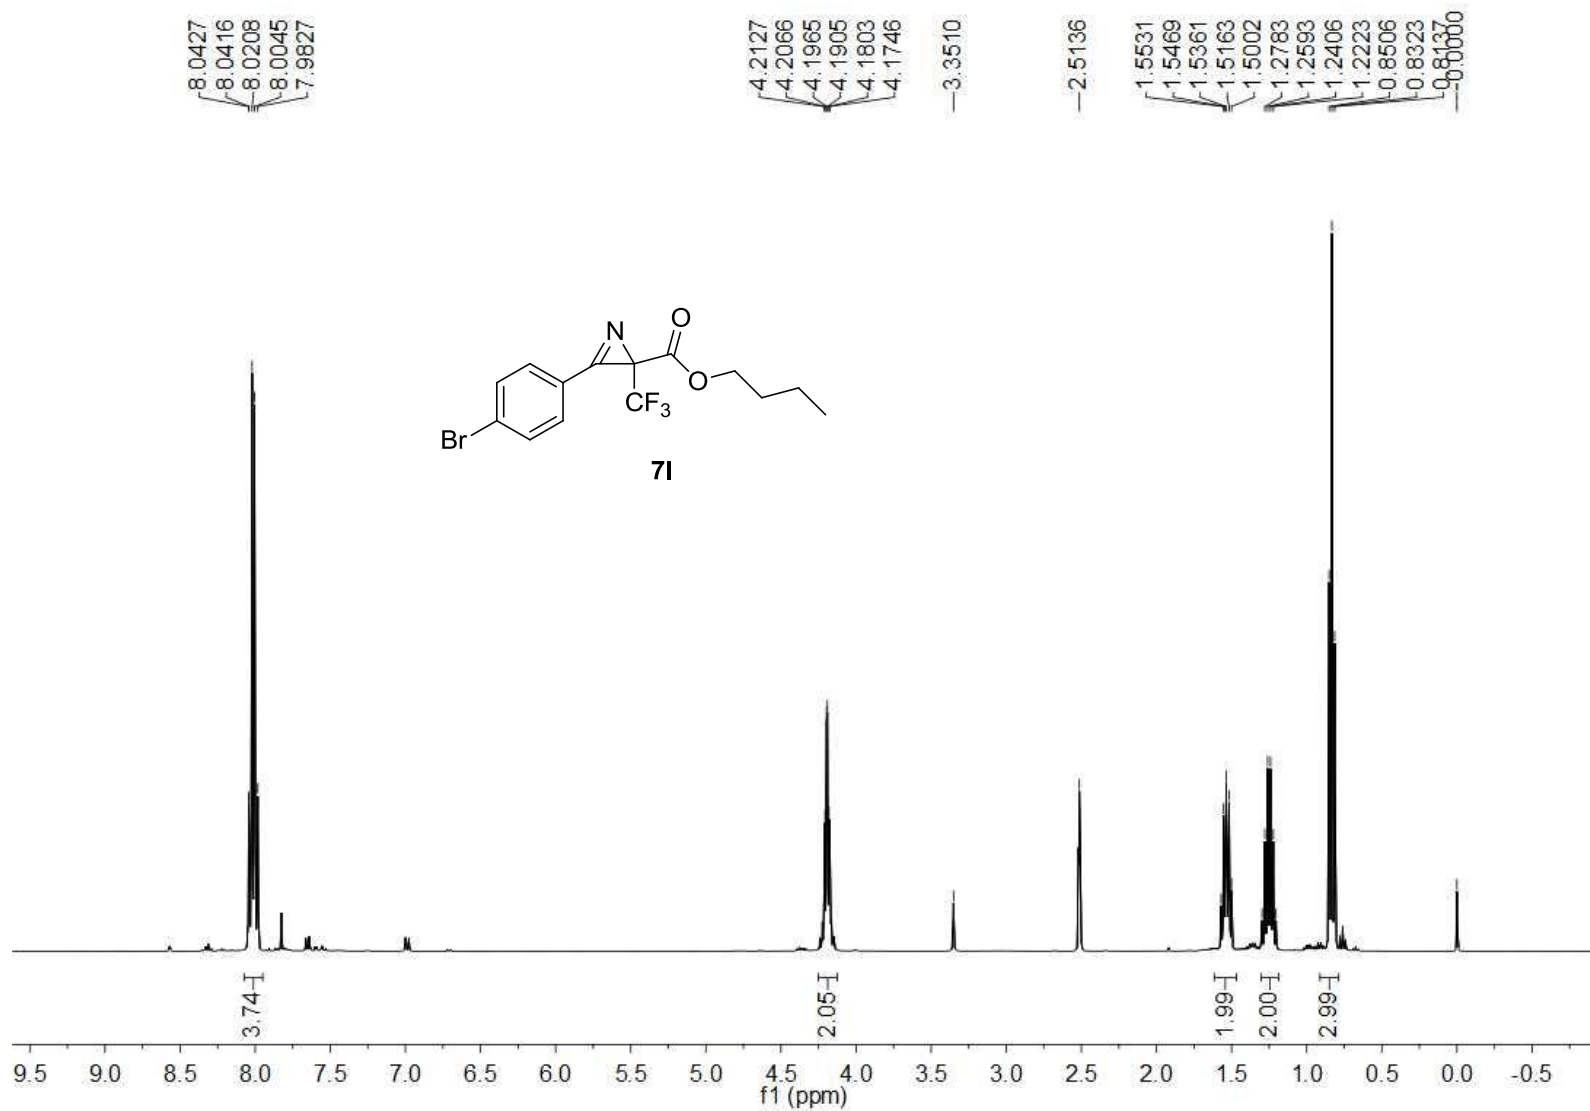

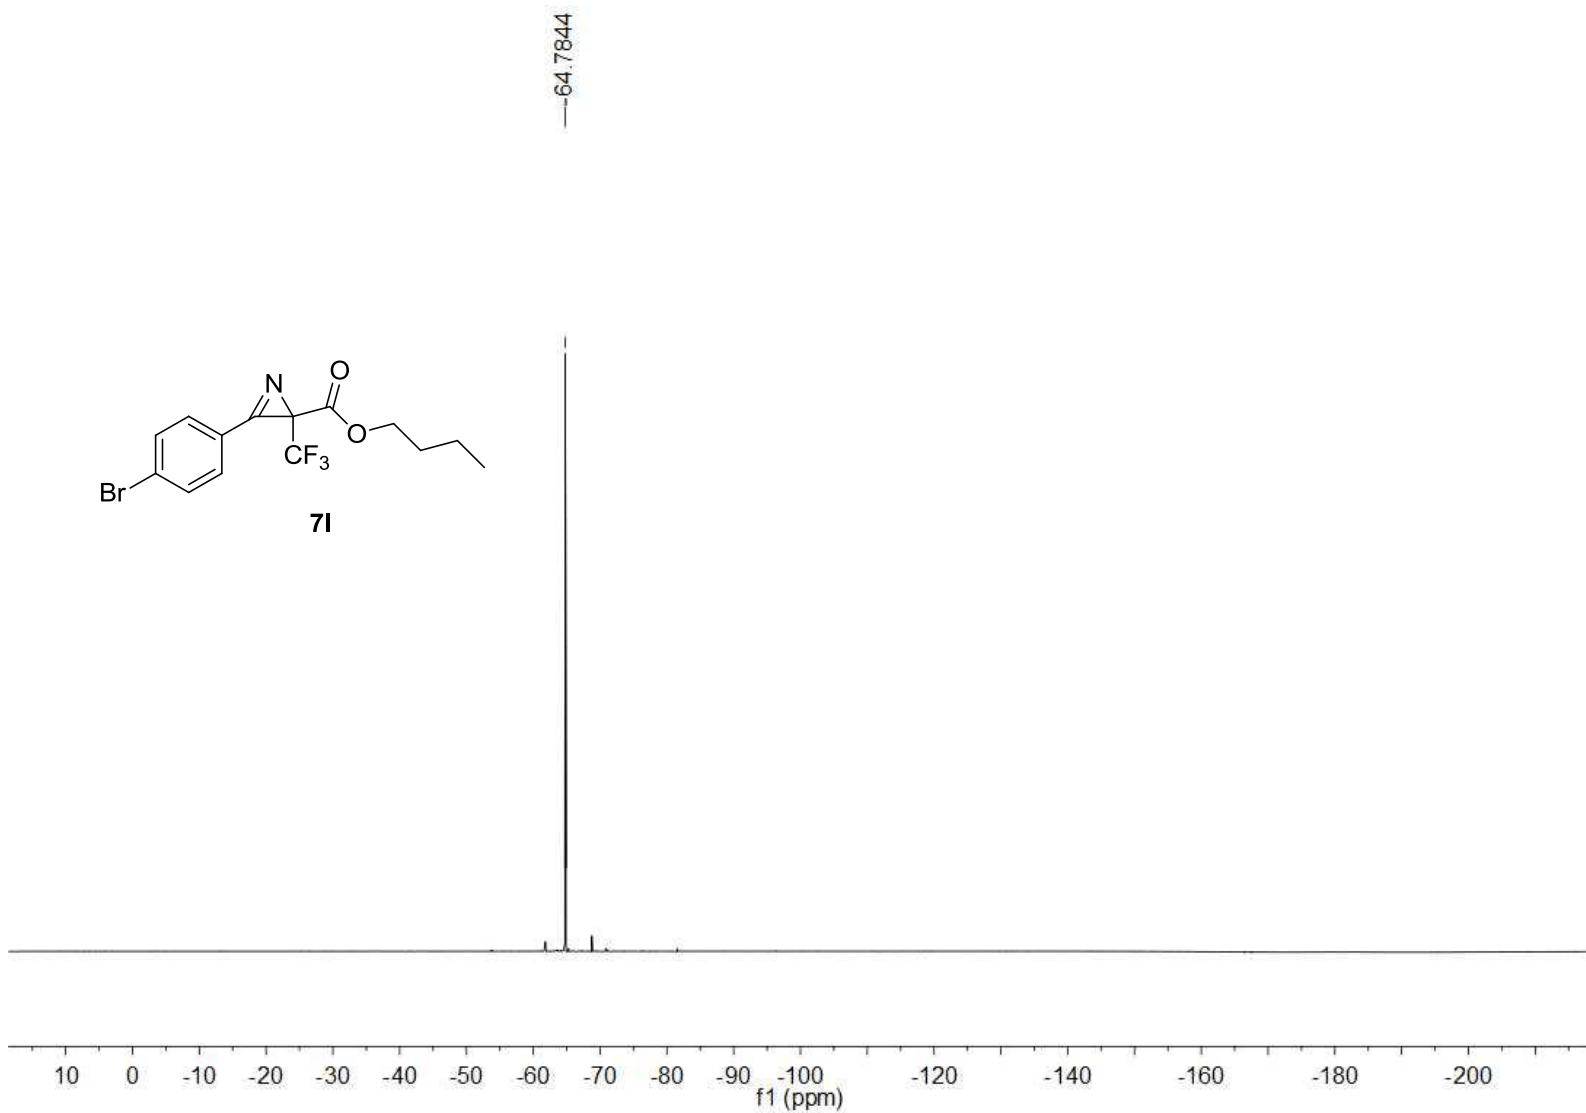



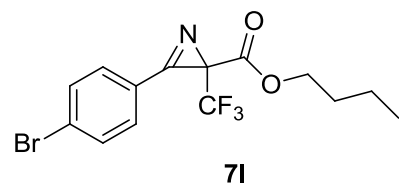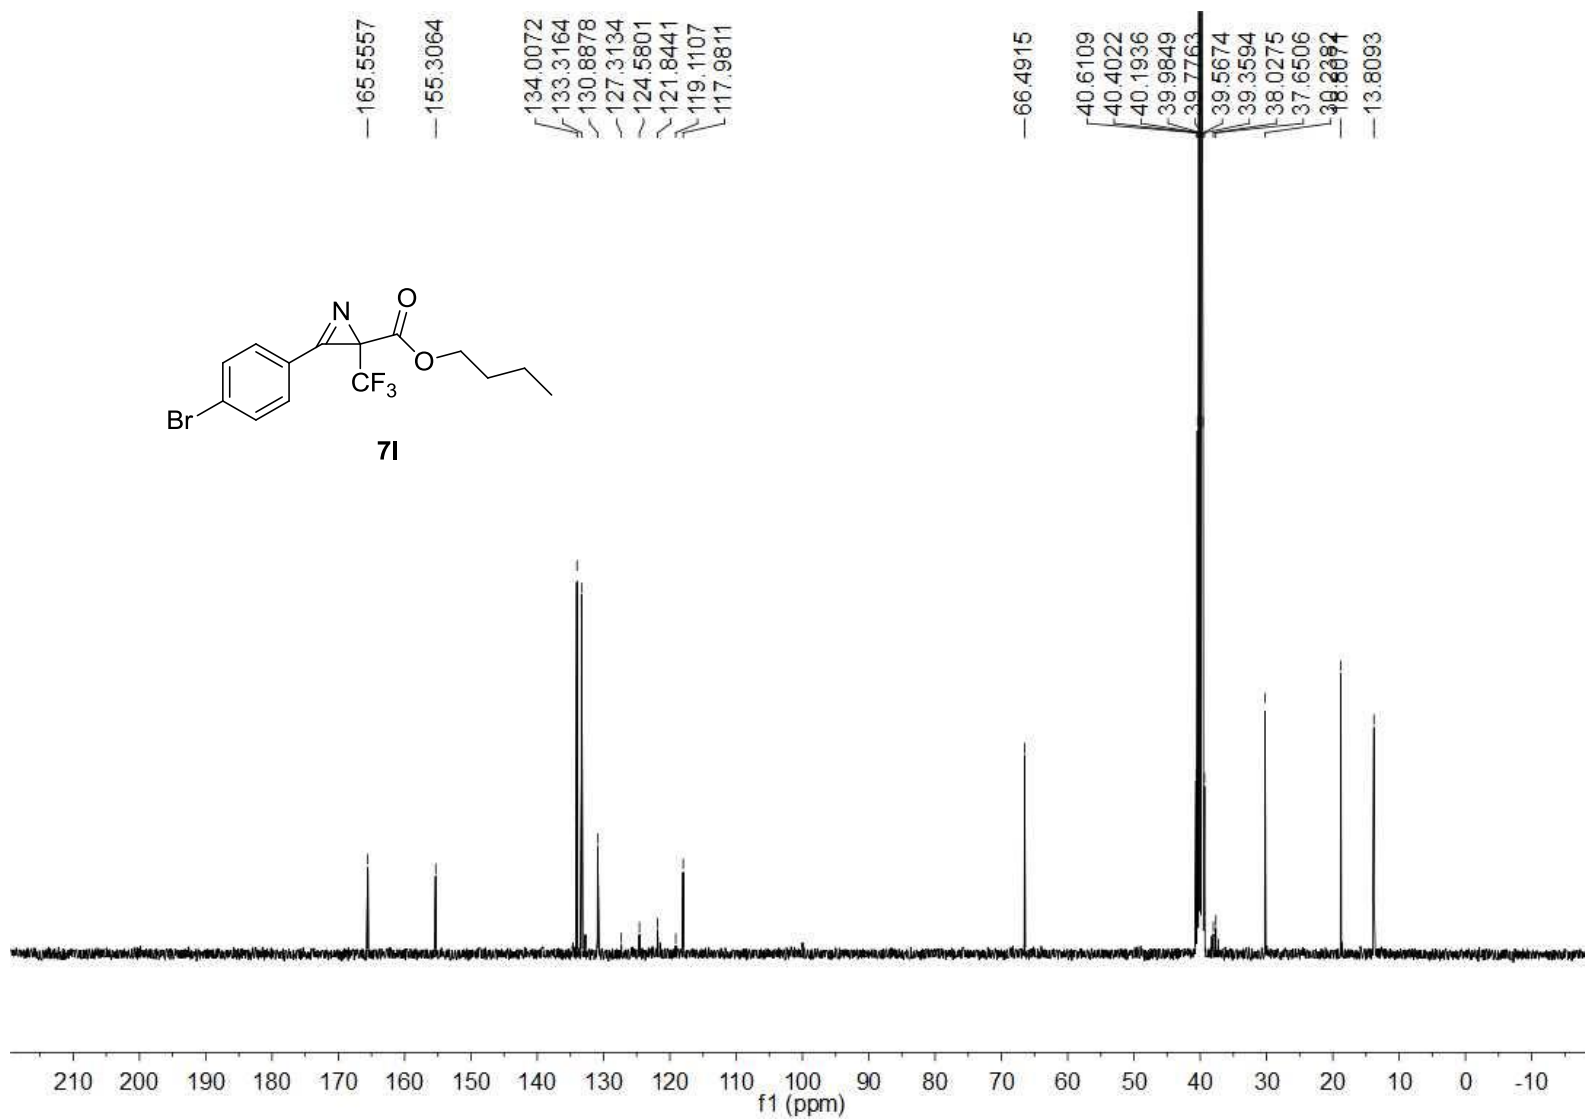

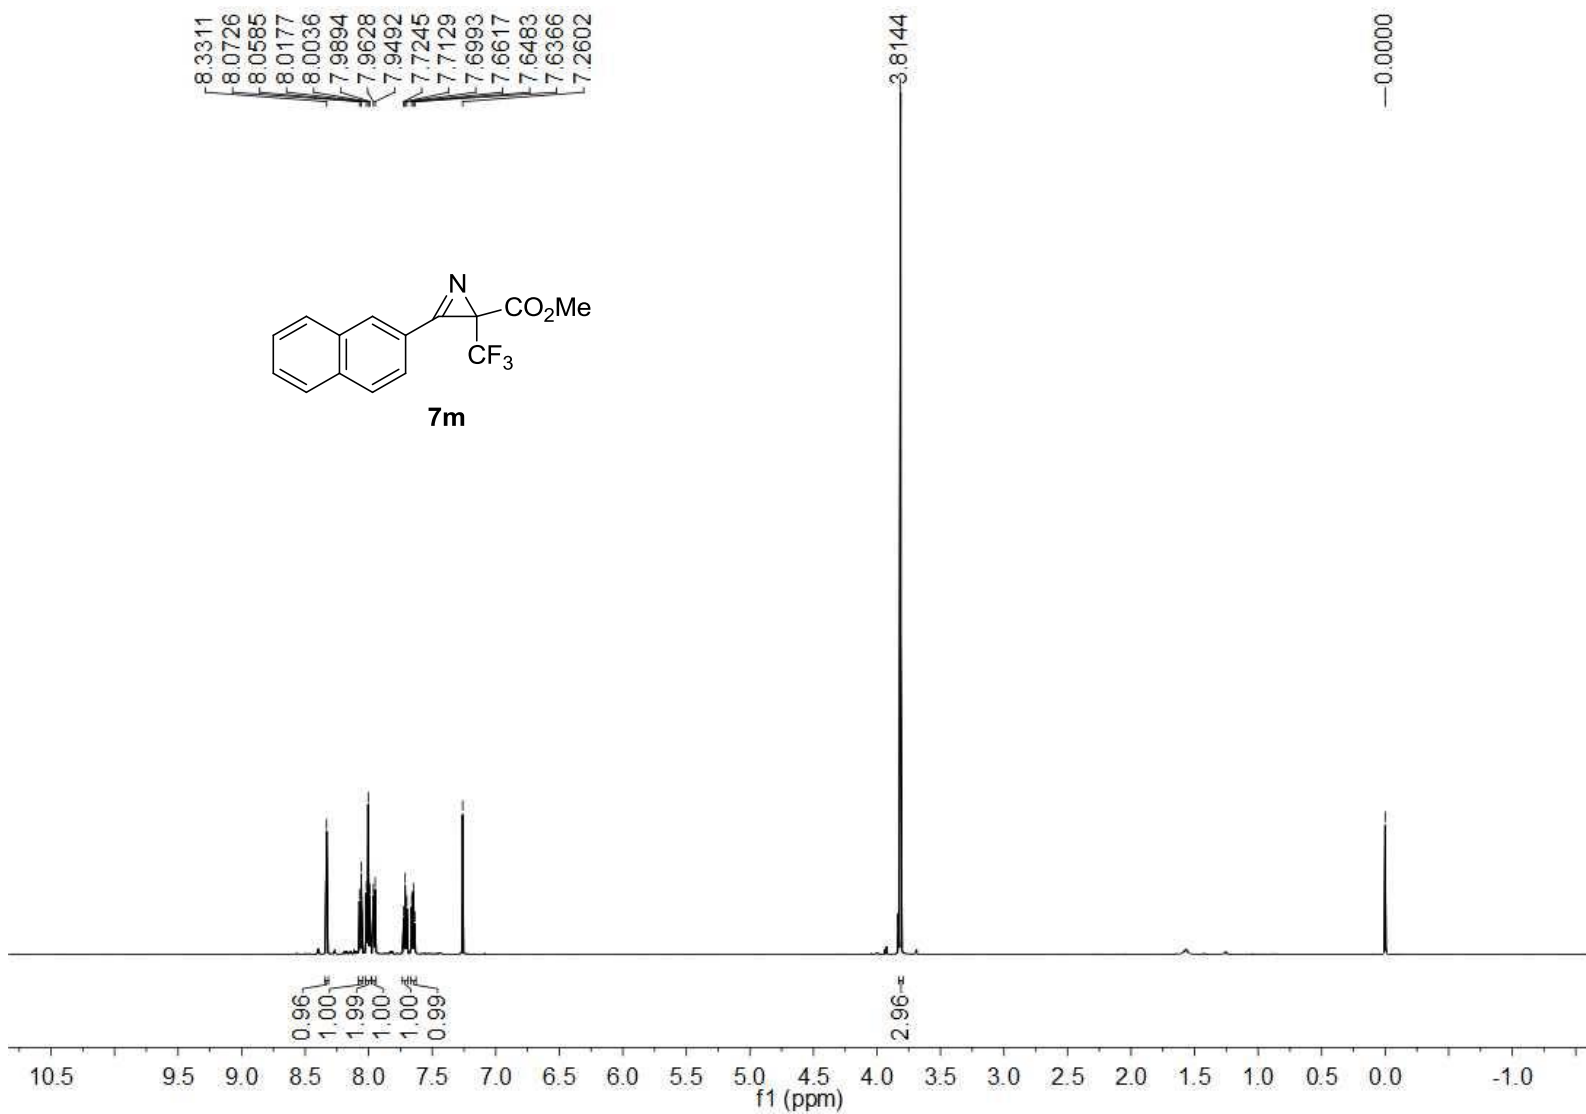

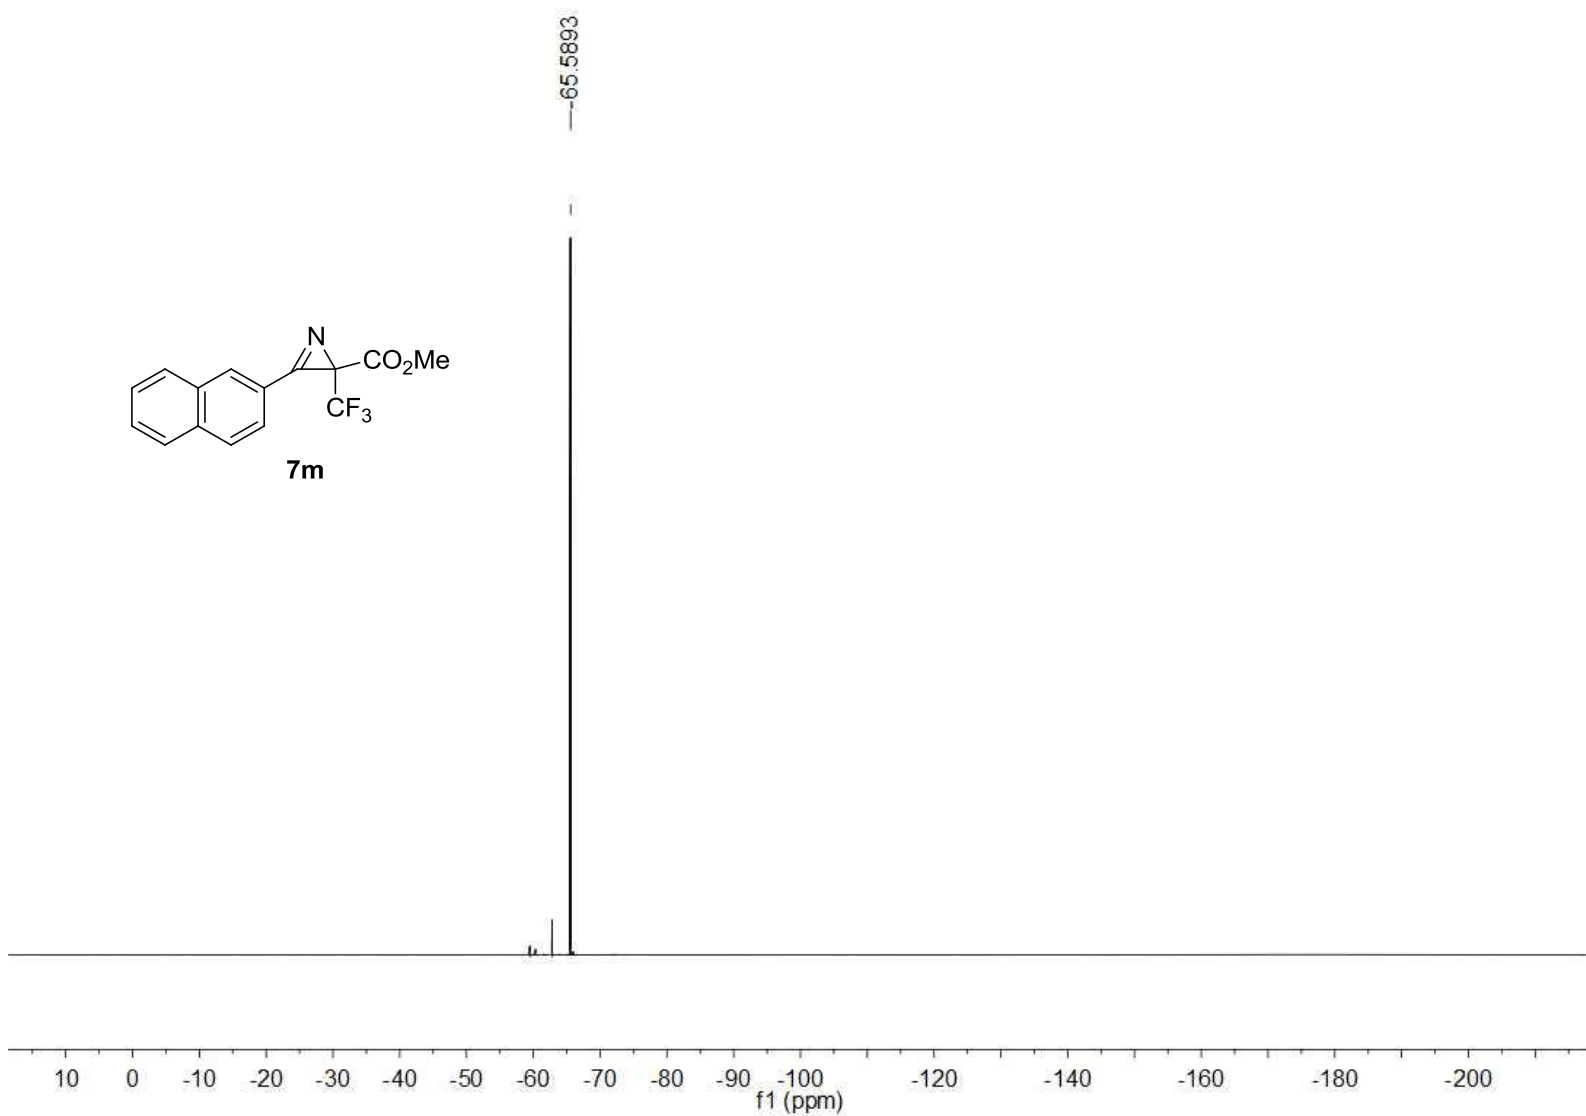

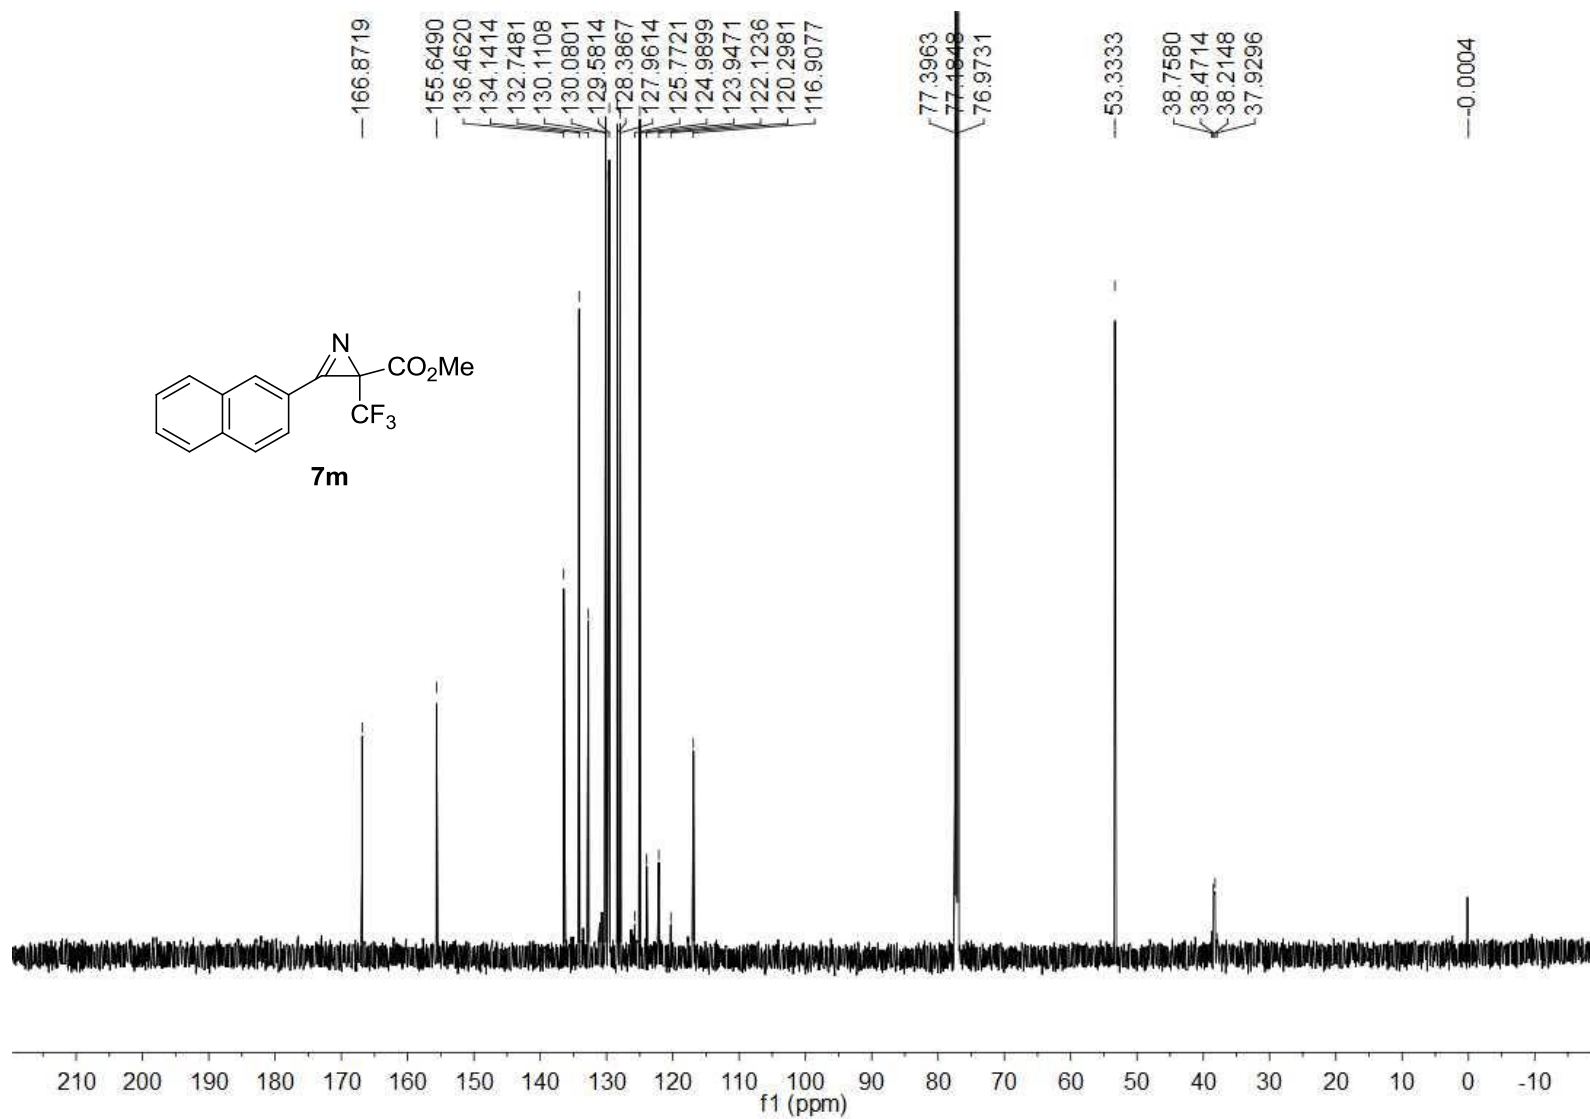

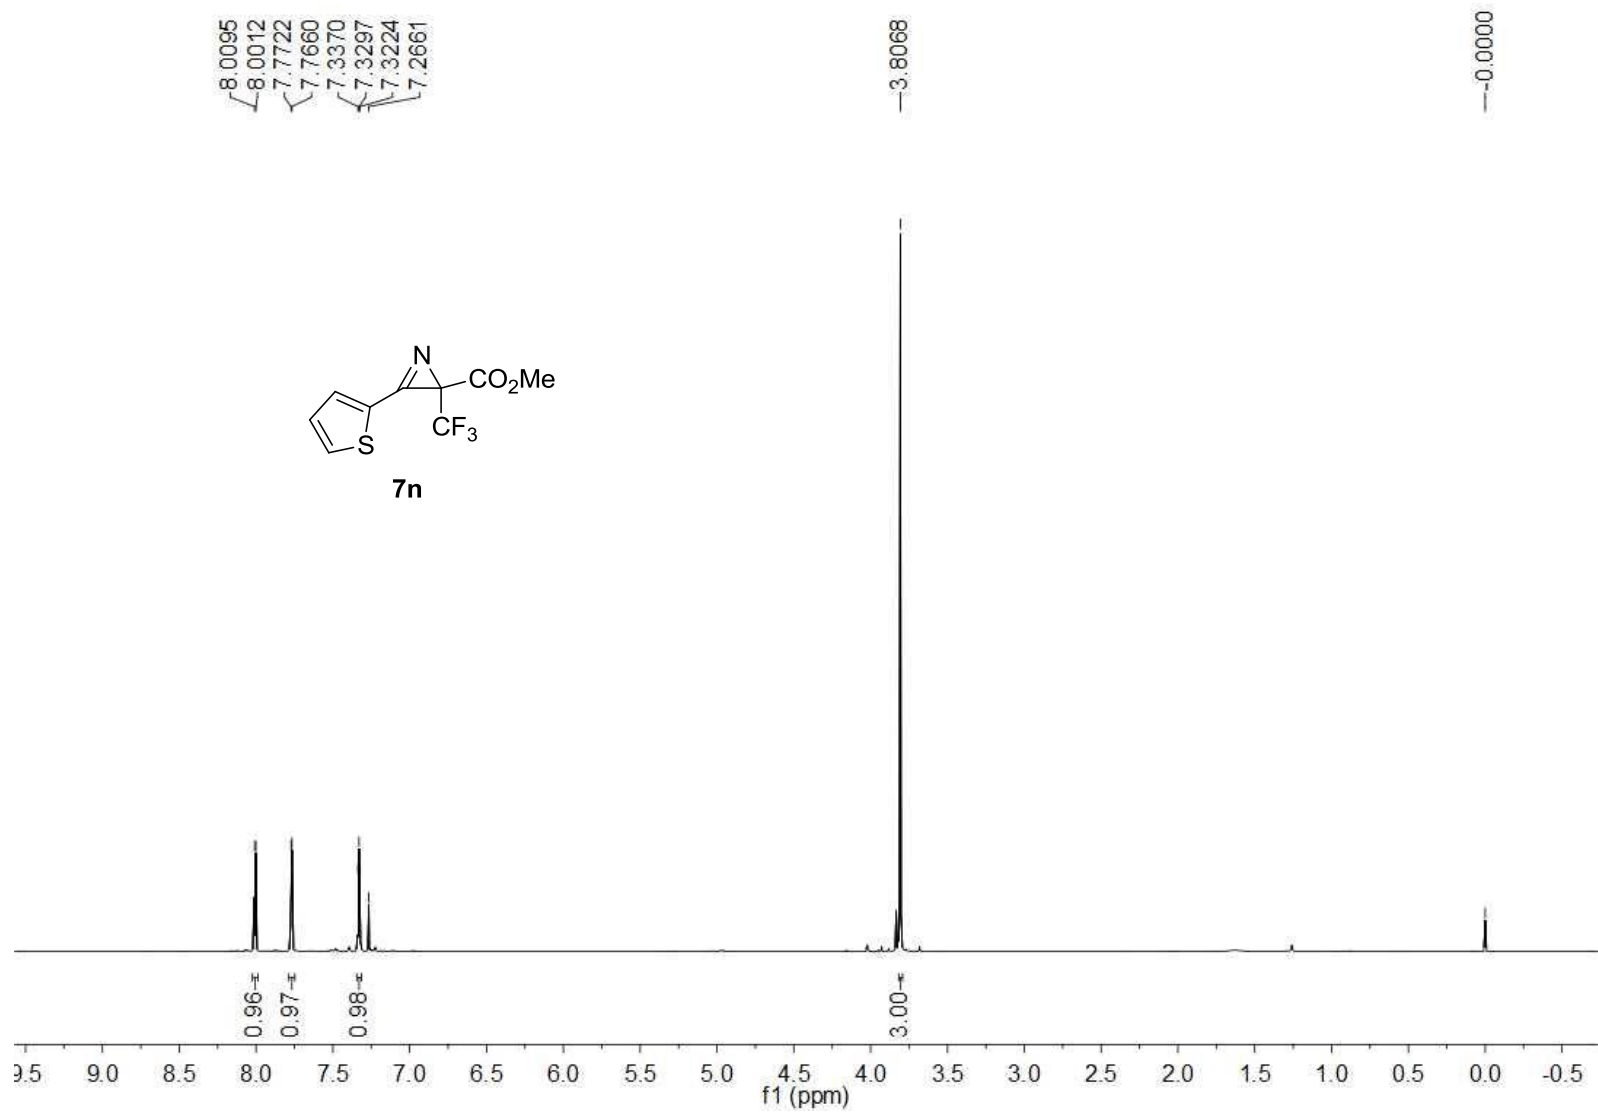

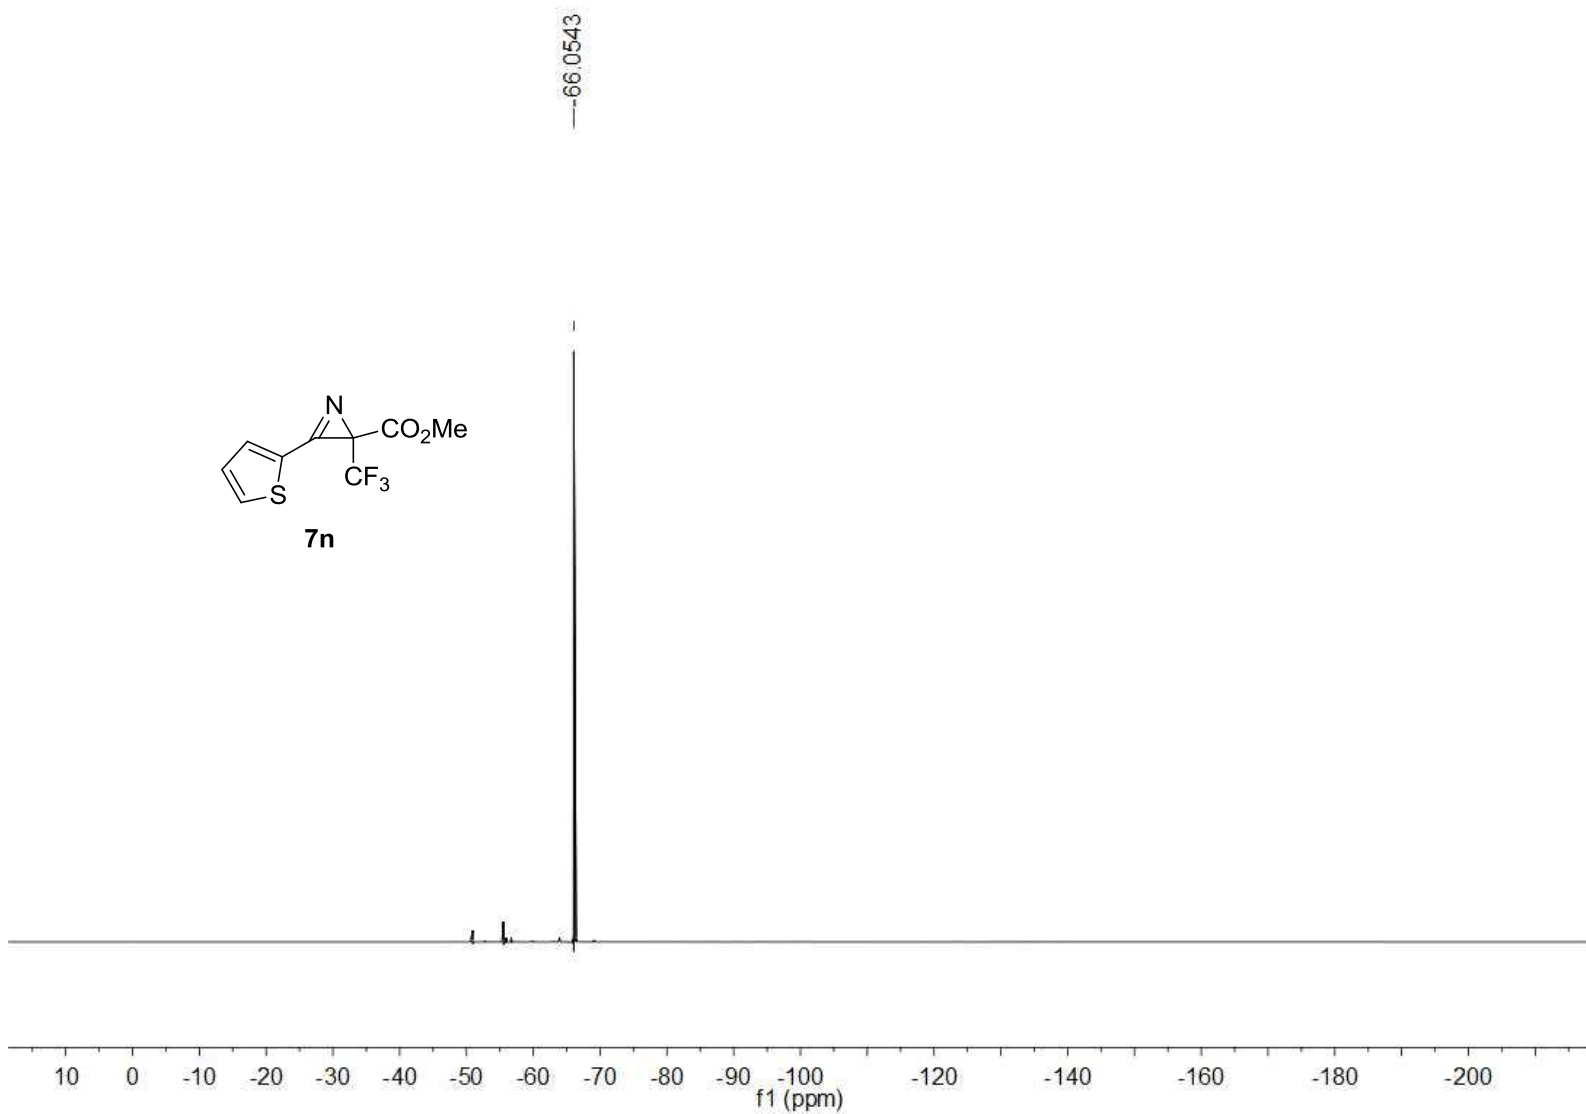

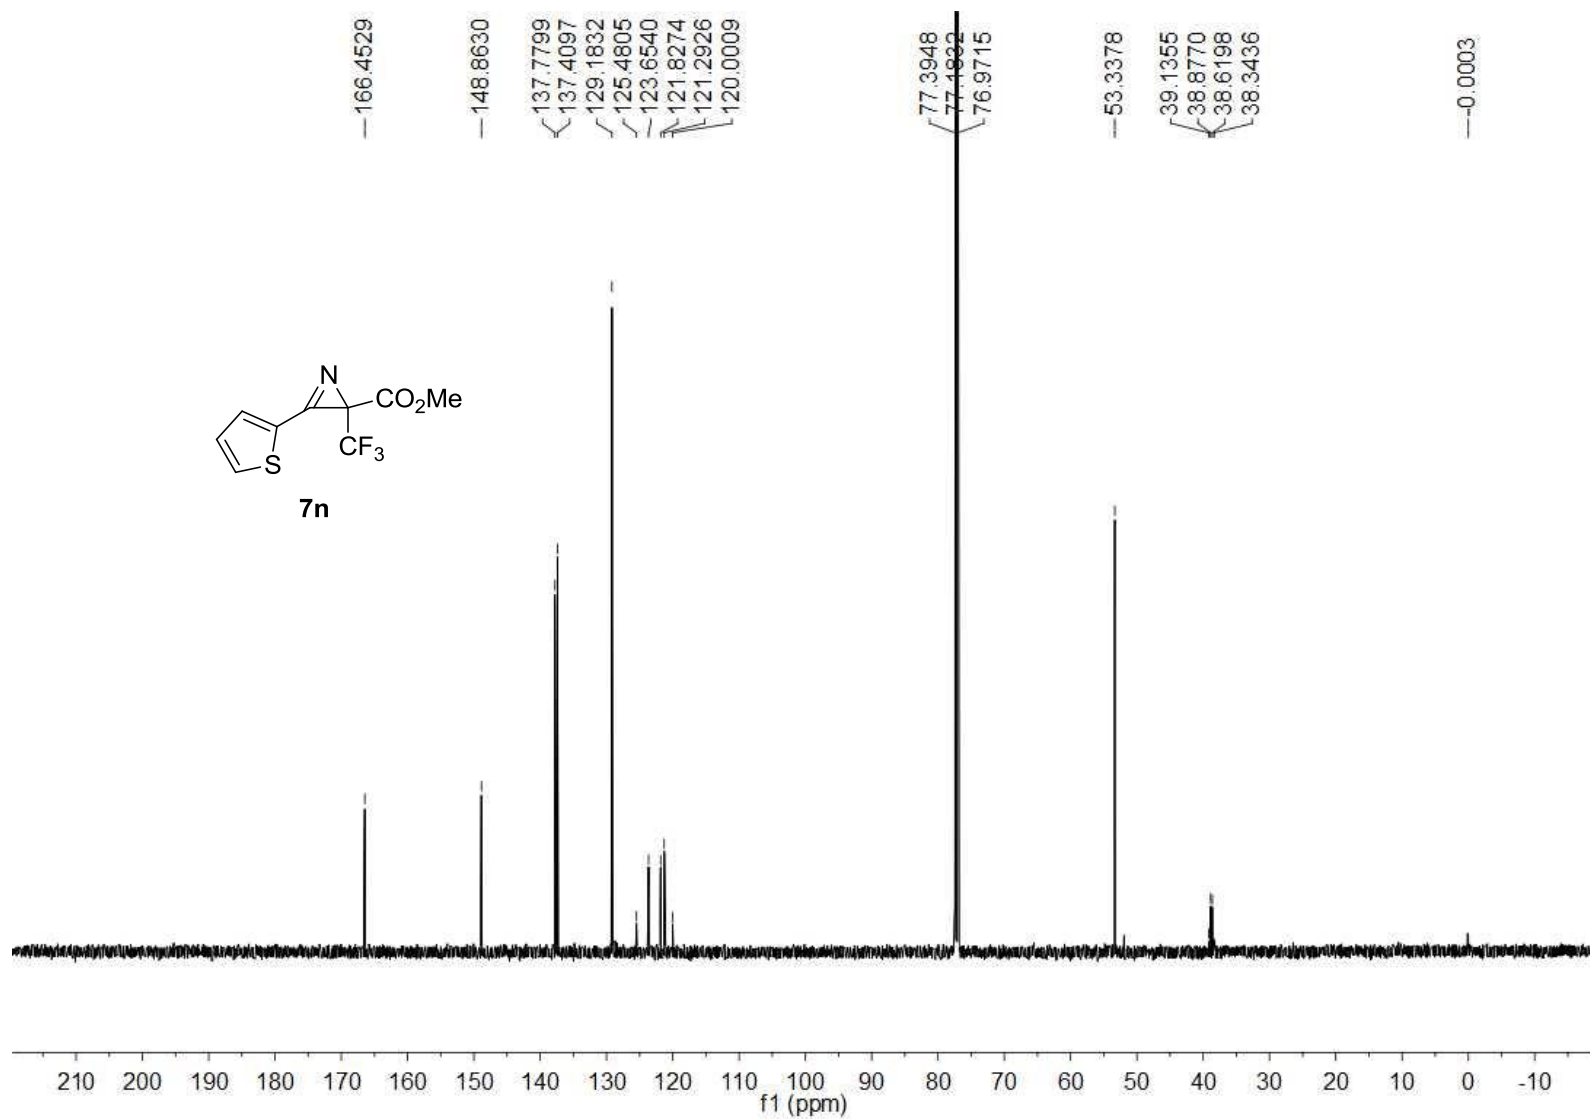

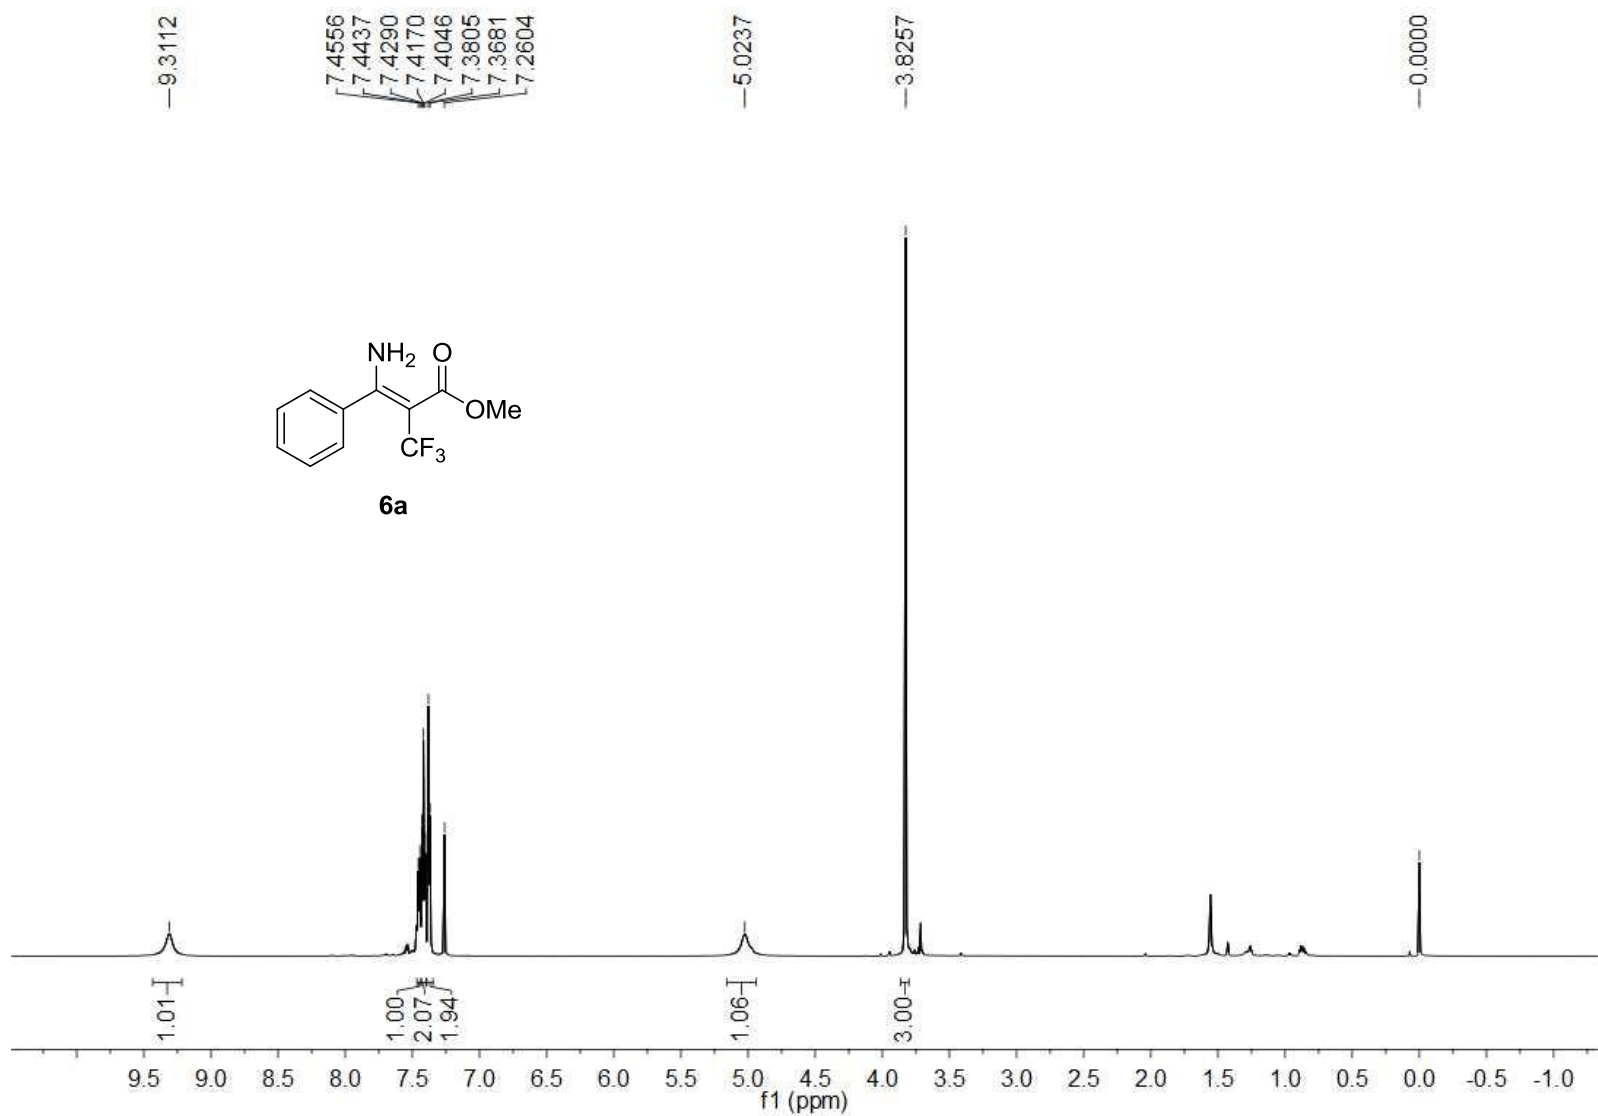



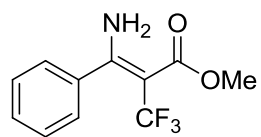

**6a**

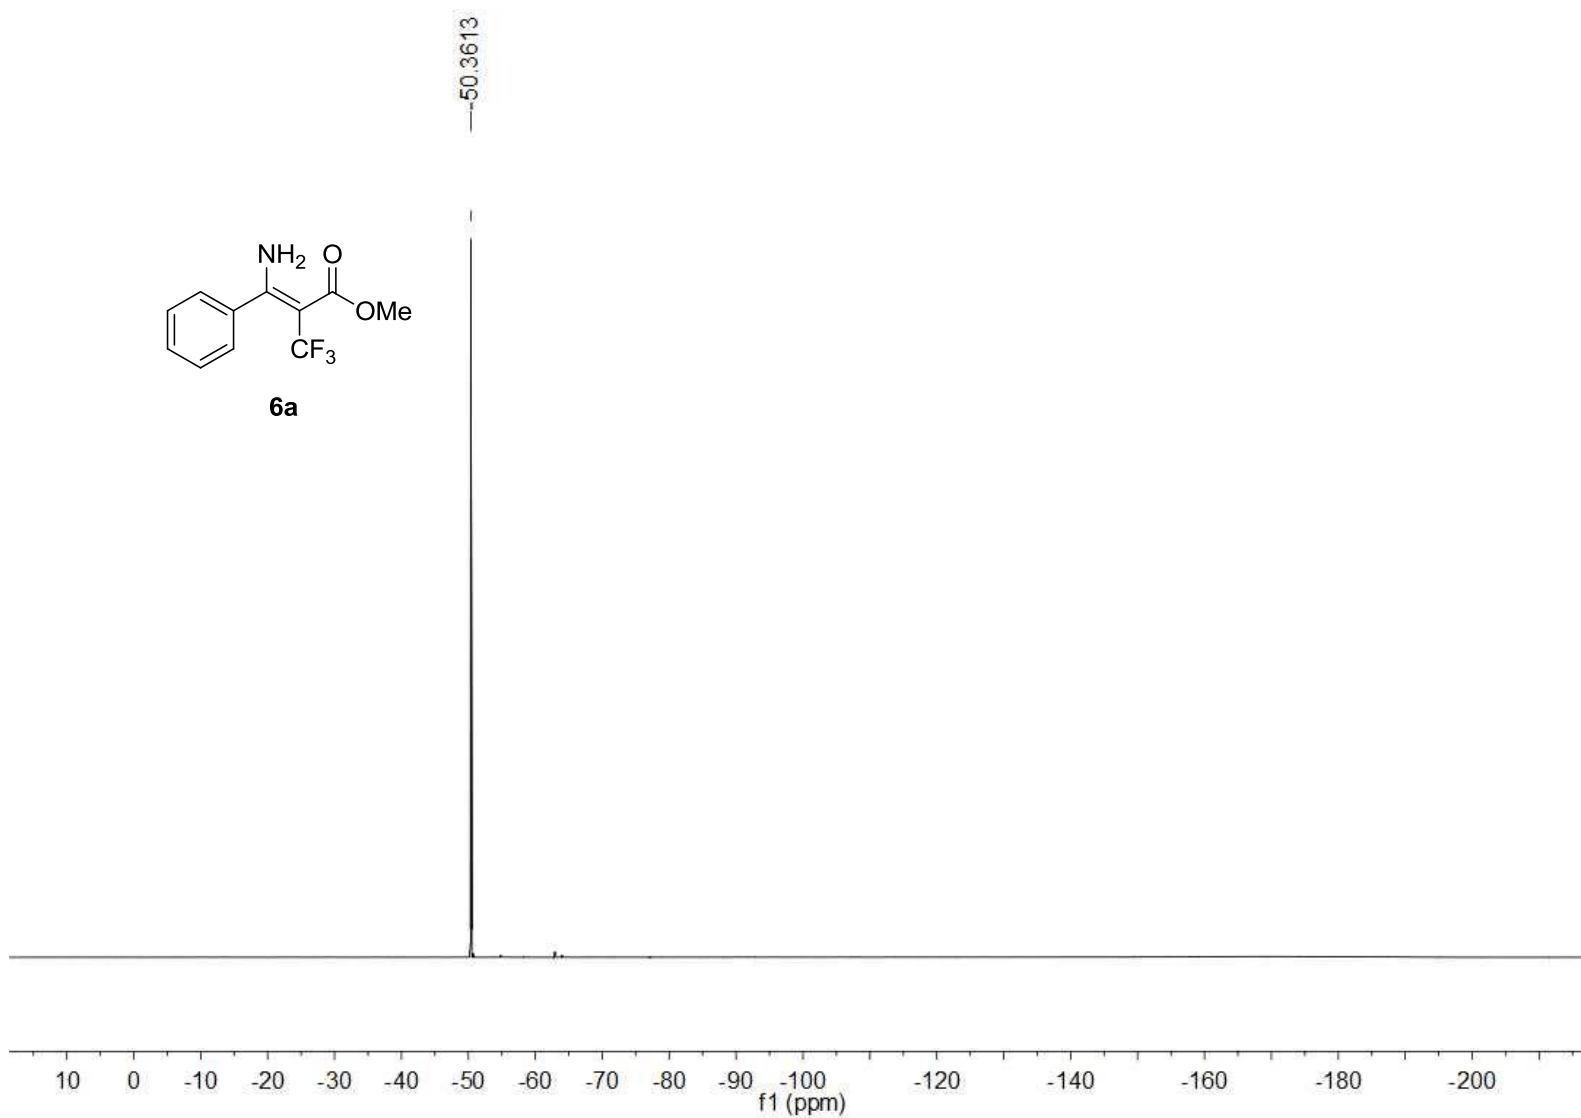

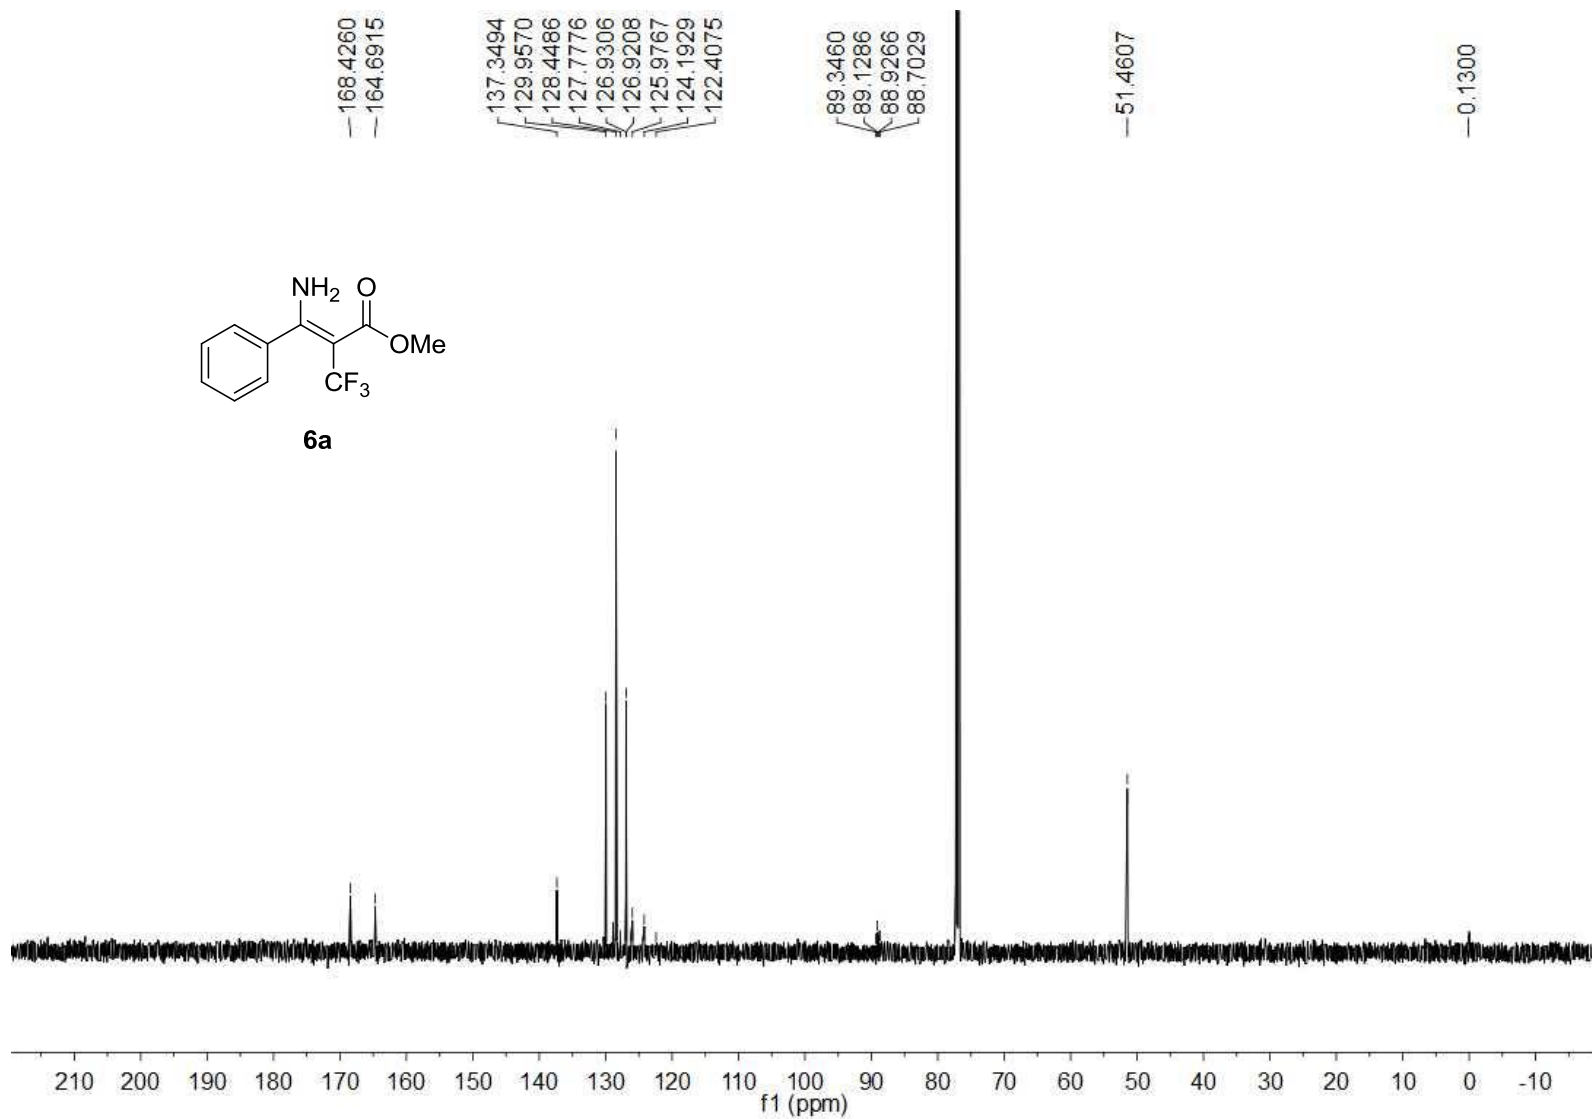

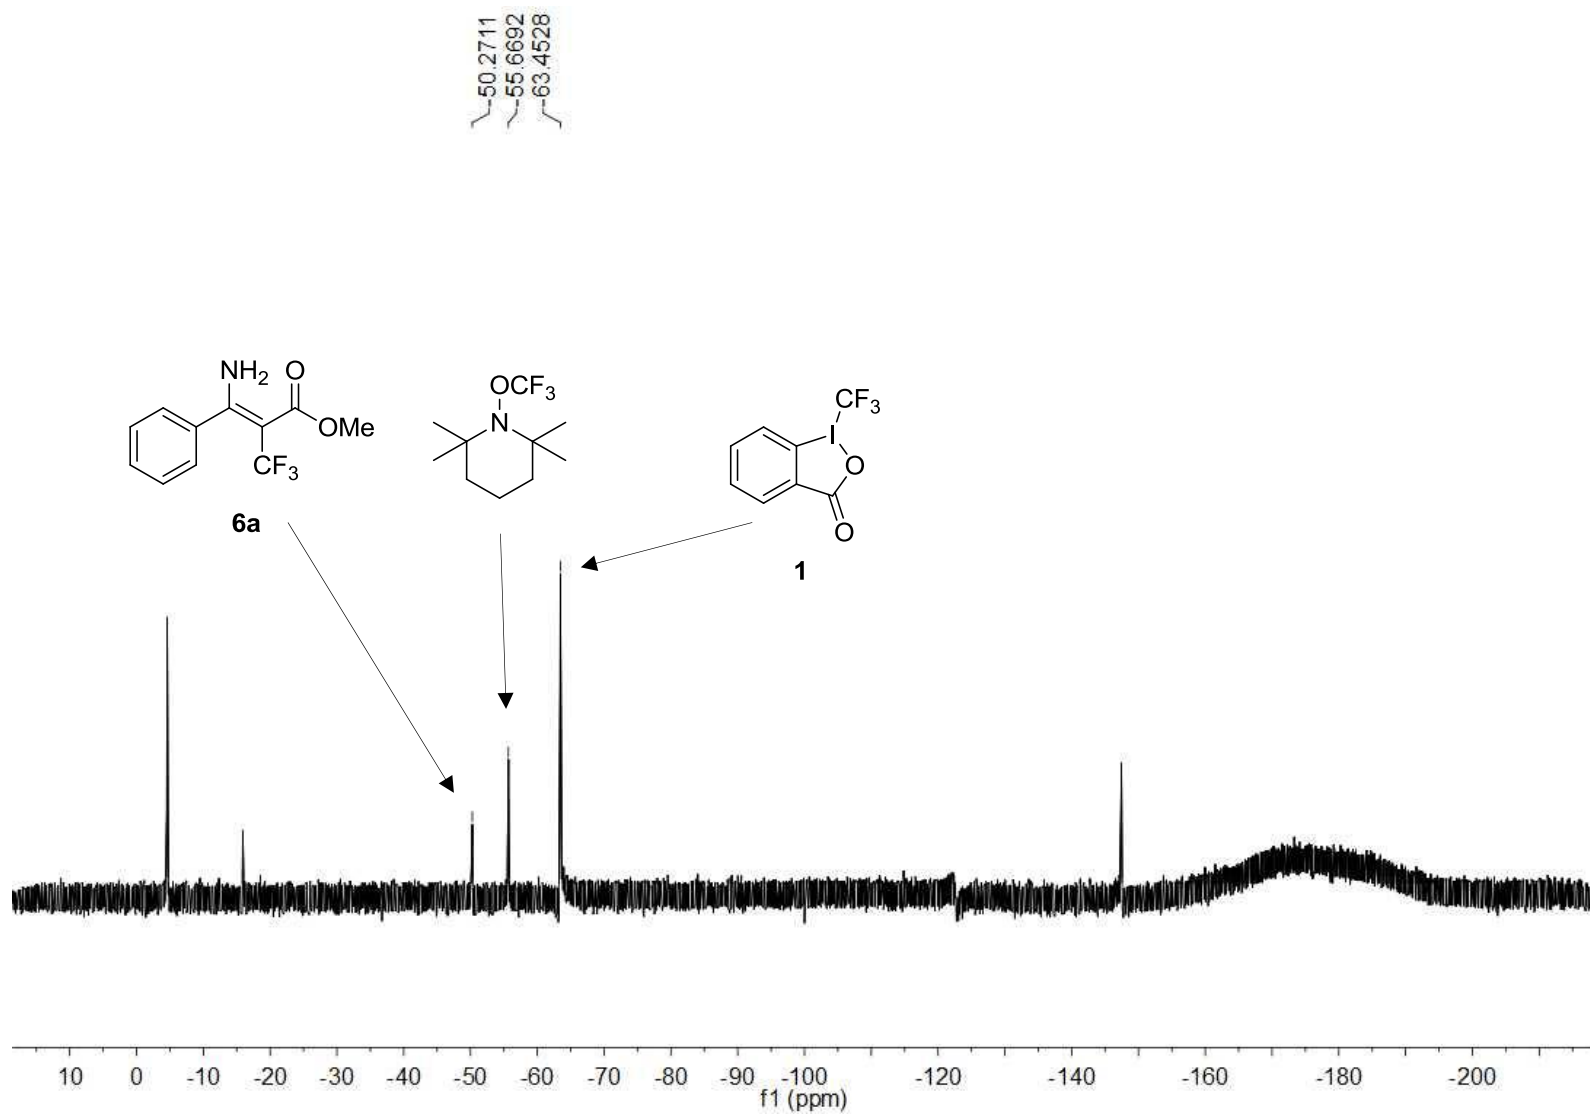

Supplement: Beilstein_J_Org_Chem-14-1452-s001.pdf [file Beilstein_J_Org_Chem-14-1452-s001.pdf]
